# Supplementary material for: Population Structure in a Comprehensive Genomic Data Set on Human Microsatellite Variation
Source: Oxford University Press journal article supplement (doi:10.1534/g3.113.005728), 2013-03-28
Supplement: 005728_005728si.pdf [file 005728_005728si.pdf]

## Population structure in a comprehensive genomic data set on human microsatellite variation

Trevor J. Pemberton<sup>§,1</sup>, Michael DeGiorgio<sup>†</sup>, and Noah A. Rosenberg<sup>§</sup>

<sup>§</sup>Department of Biology, Stanford University, Stanford, CA 94305

<sup>†</sup>Department of Integrative Biology, University of California, Berkeley, CA 94720

<sup>1</sup>Present address: Department of Biochemistry and Medical Genetics, University of Manitoba, Winnipeg, MB R3E 0J9

Author to whom correspondence should be addressed:

Dr. Trevor J. Pemberton

Department of Biochemistry and Medical Genetics,

745 Bannatyne Avenue, Winnipeg, MB R3E 0J9

Tel: (204) 789-3602

E-mail: [pembertont@med.umanitoba.ca](mailto:pembertont@med.umanitoba.ca)

DOI: 10.1534/g3.113.005728

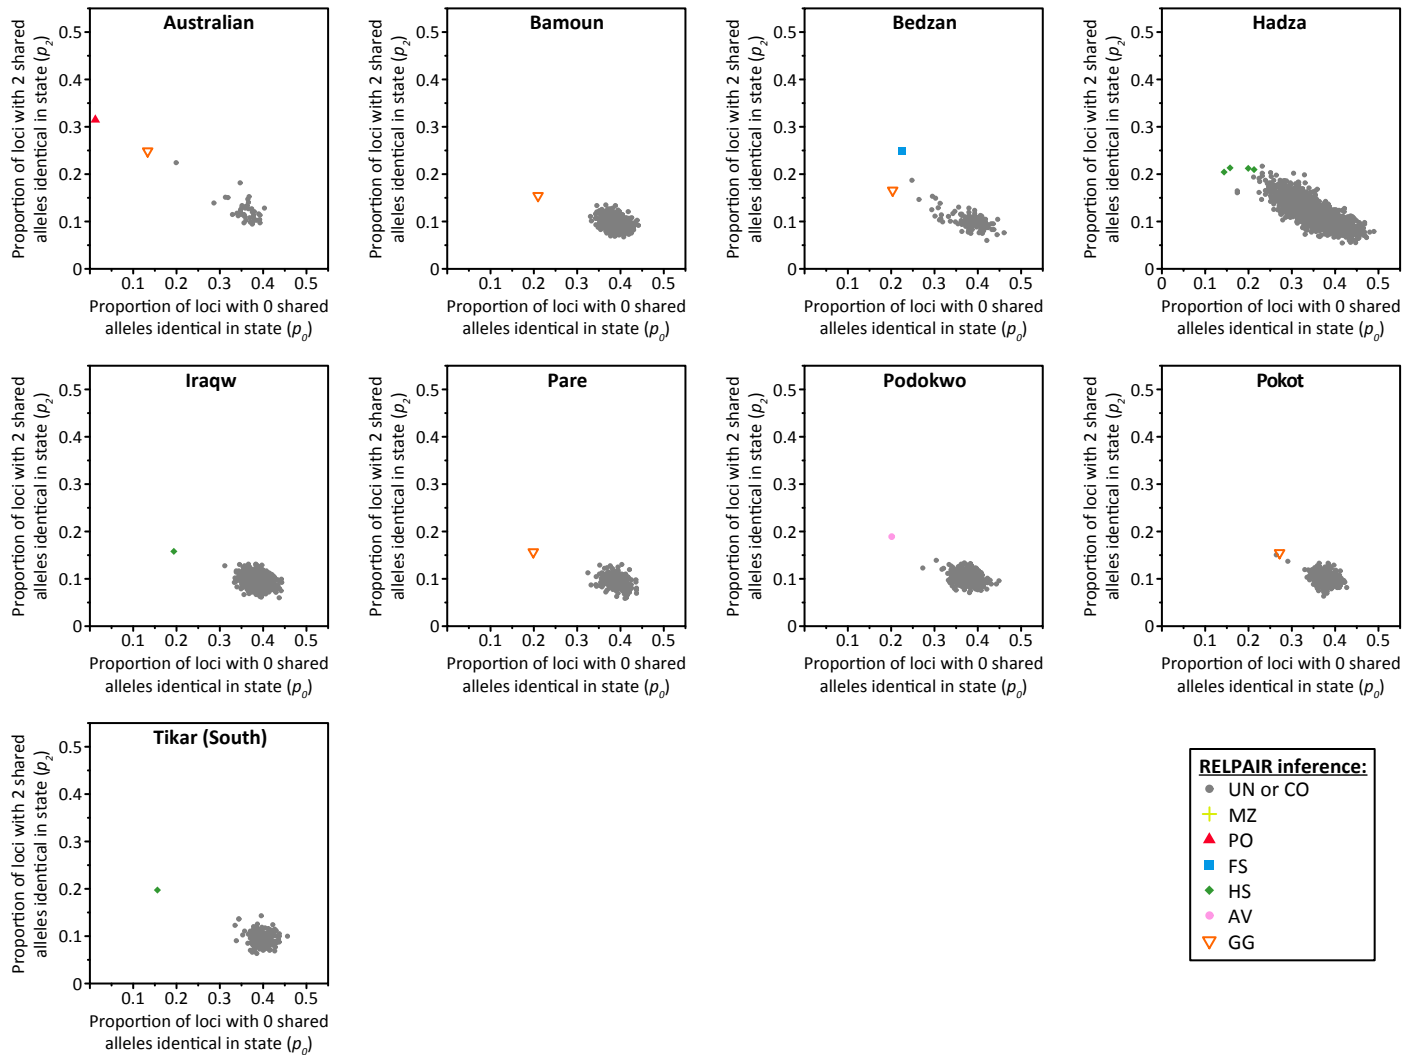

**Figure S1** Intra-population allele-sharing for pairs of individuals in those populations in the African data set for which we inferred at least one relative pair. First- and second-degree intra-population relative pairs are reported in Tables S5 and S6, respectively.

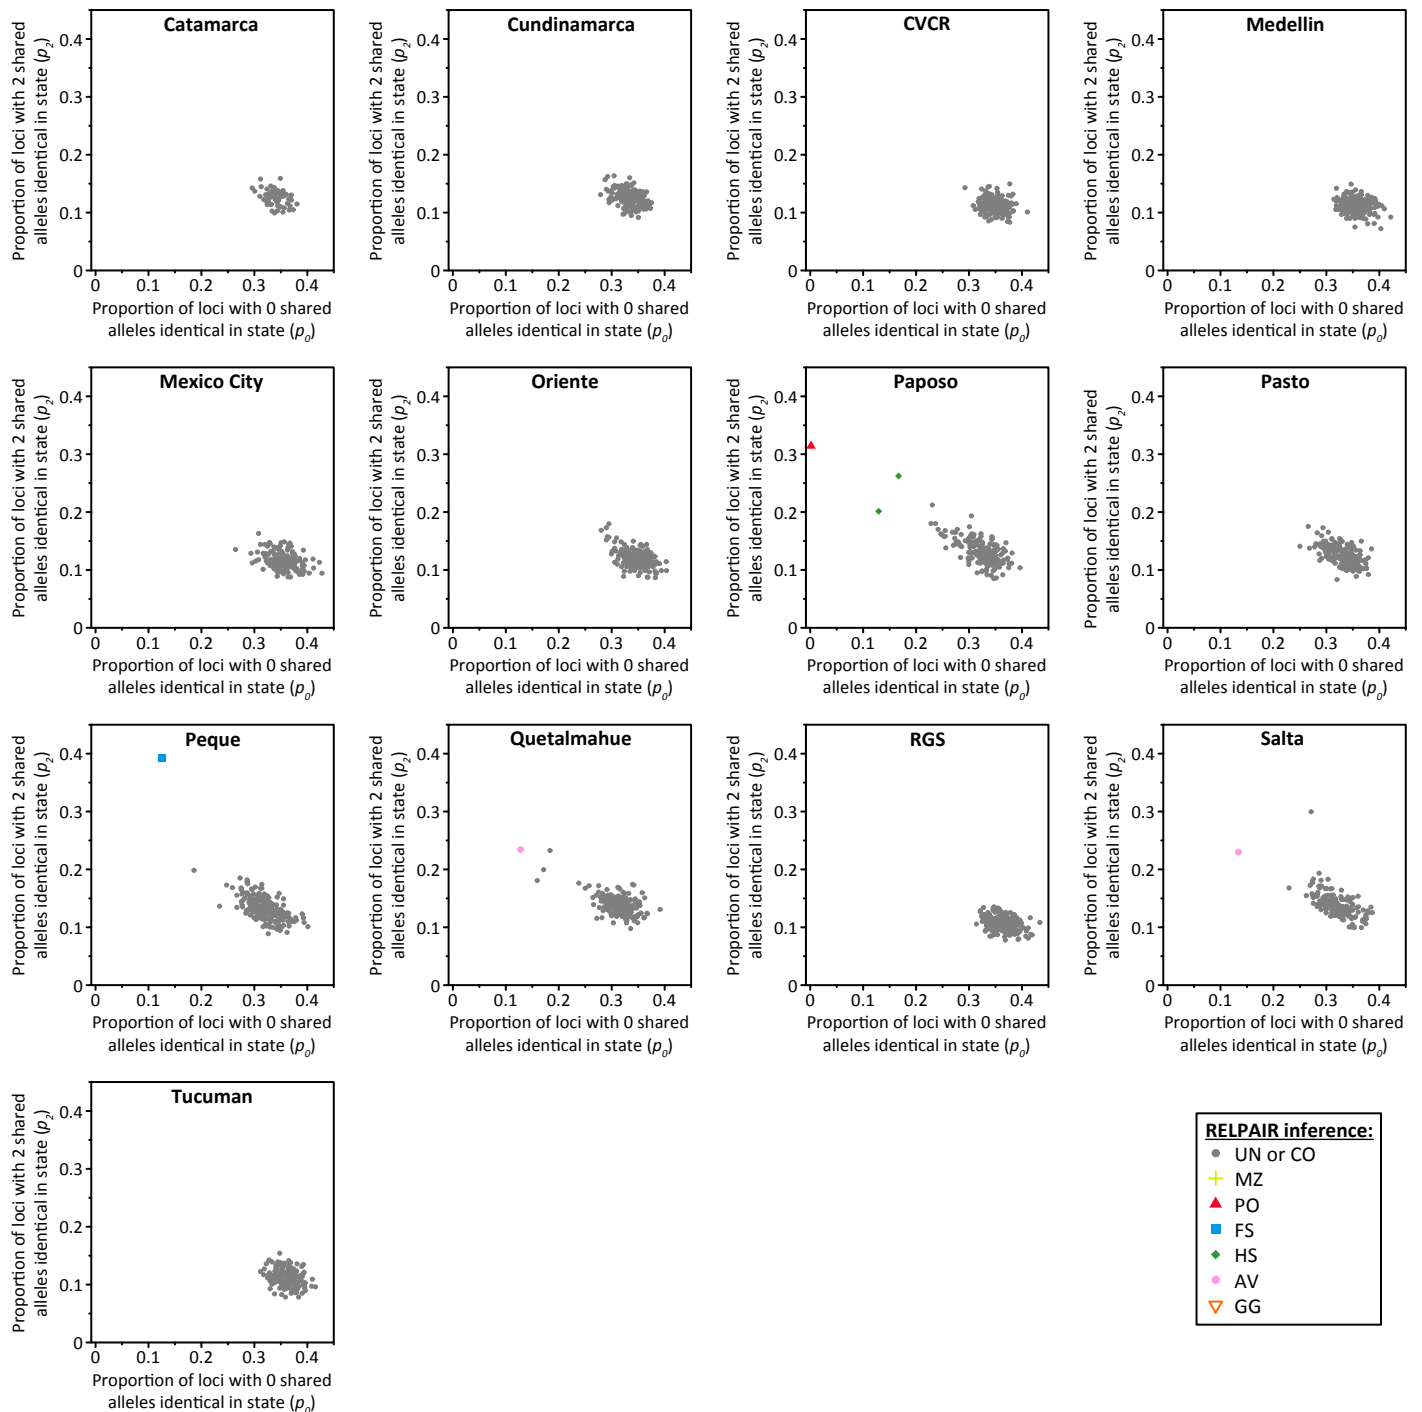

**Figure S2** Intra-population allele-sharing for pairs of individuals in the Latino data set. First- and second-degree relative pairs are reported in Tables S7 and S8, respectively.

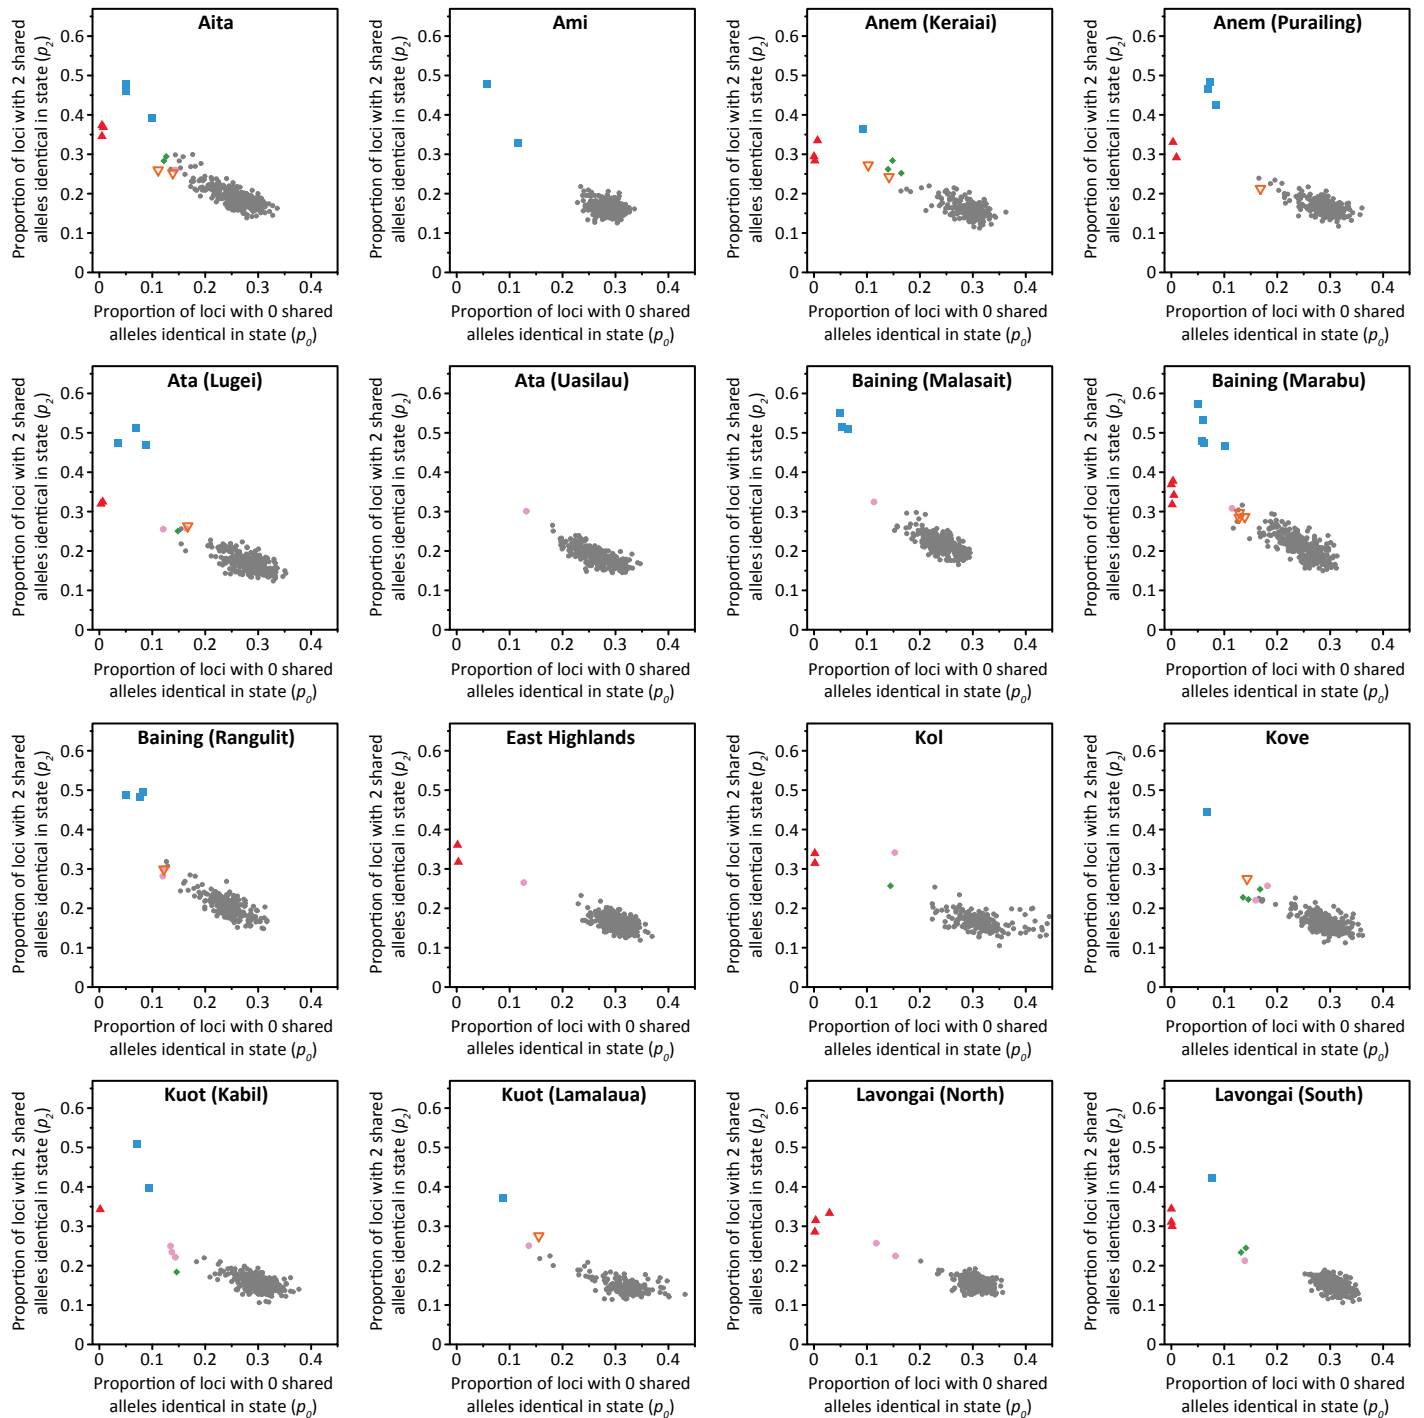

**Figure S3** Intra-population allele-sharing for pairs of individuals in the Pacific Islander data set (part 1). Symbols are as defined in Figure S1. First- and second-degree relative pairs are reported in Tables S10 and S11, respectively.

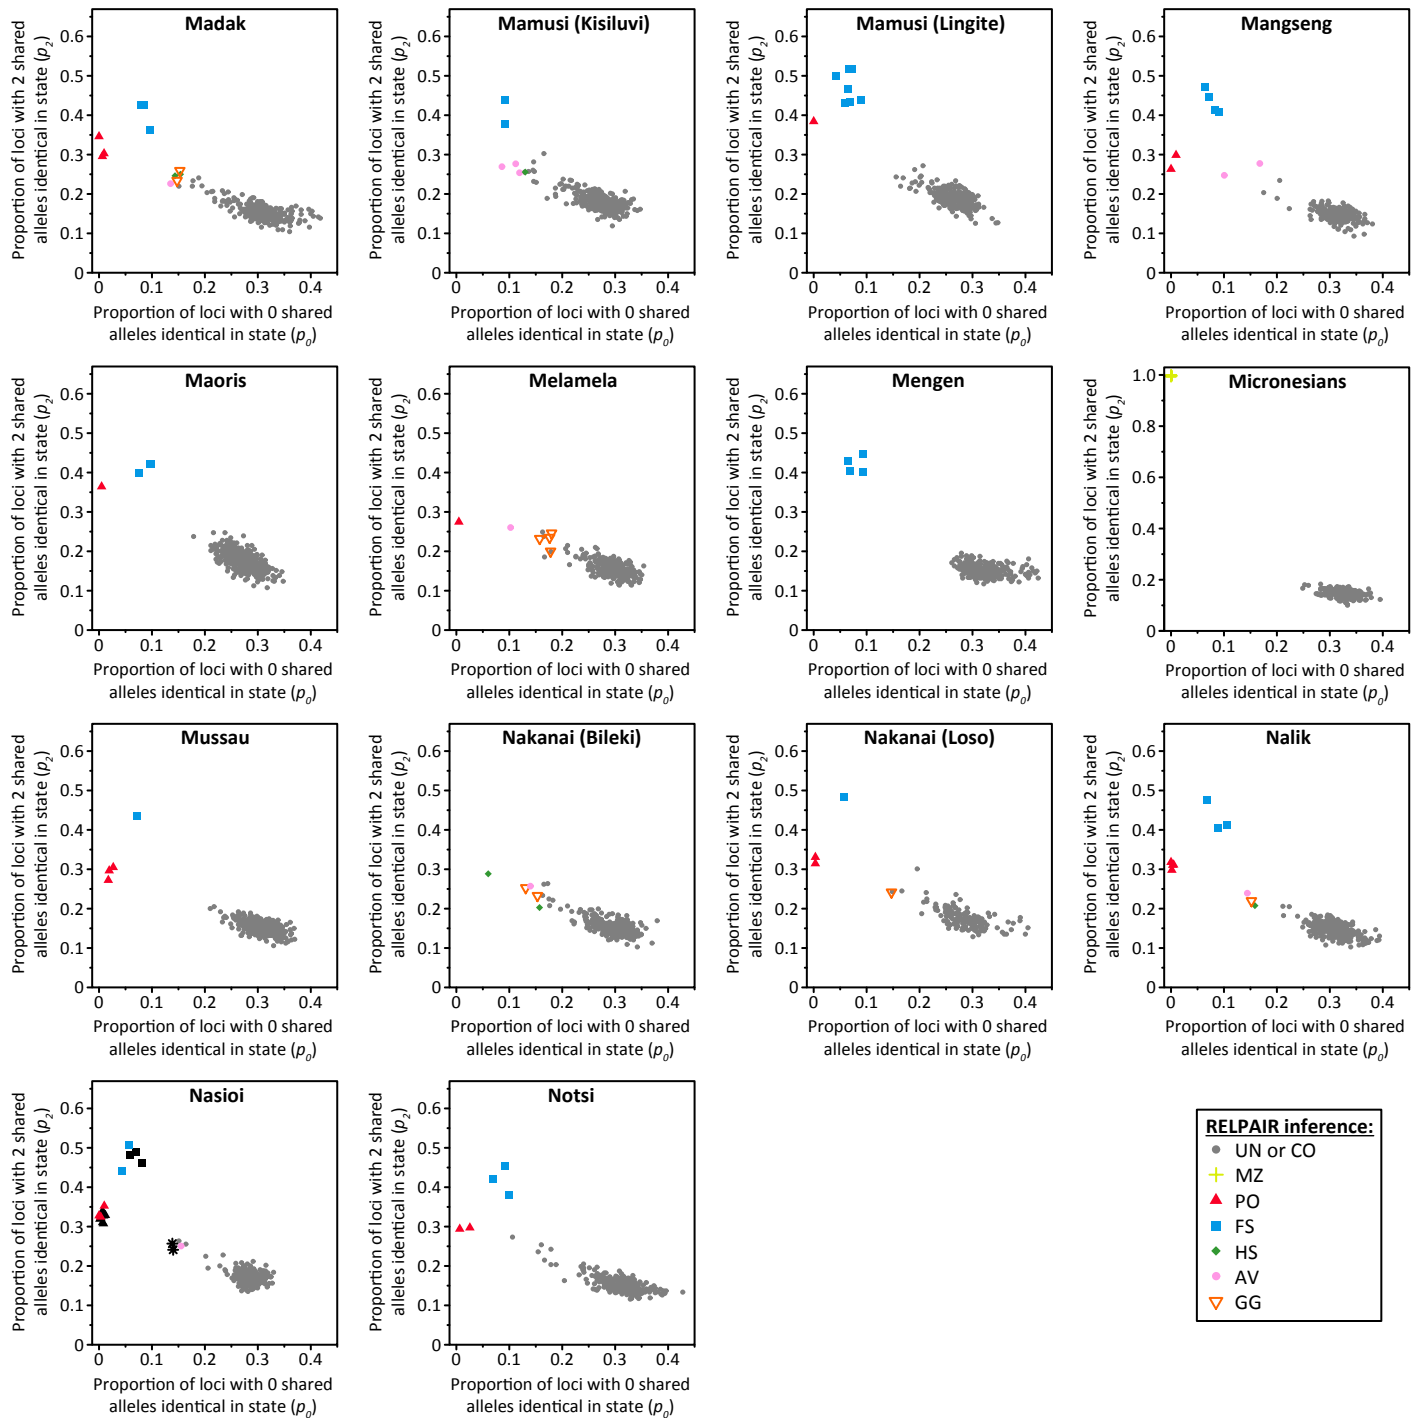

**Figure S4** Intra-population allele-sharing for pairs of individuals in the Pacific Islander data set (part 2). Symbols colored black in the Nasioi population are relative pairs identified in Rosenberg [1]. Monozygotic, first-degree, and second-degree relative pairs are reported in Tables S9, S10, and S11, respectively.

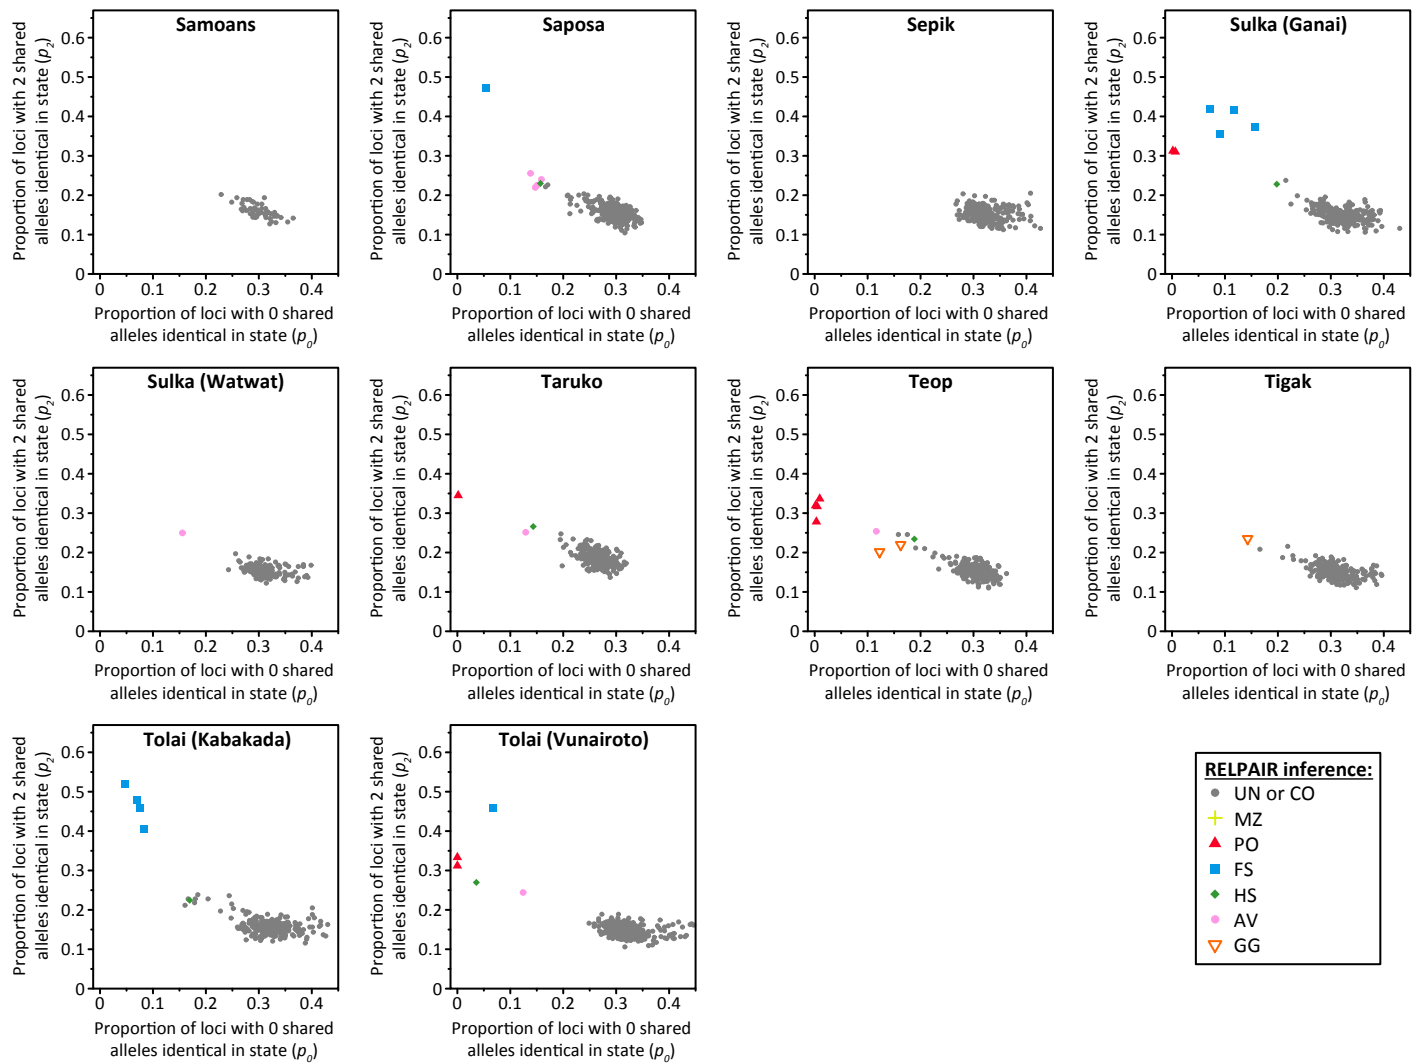

**Figure S5** Intra-population allele-sharing for pairs of individuals in the Pacific Islander data set (part 3). First- and second-degree relative pairs are reported in Tables S10 and S11, respectively.

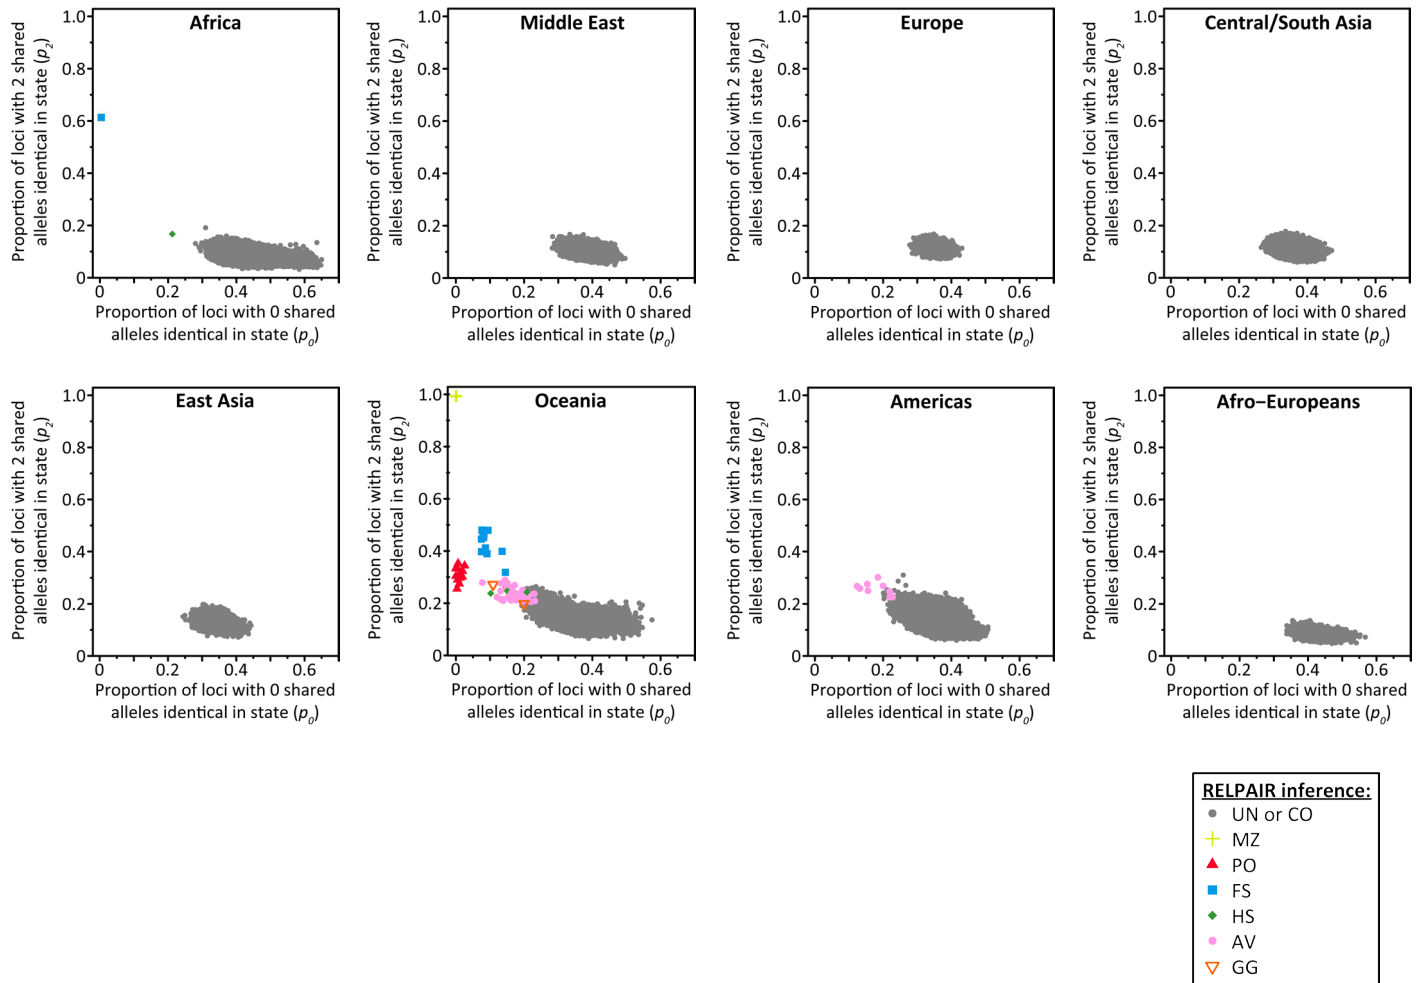

**Figure S6** Inter-population allele-sharing for pairs of individuals in each of eight subsets that group populations by their geographic affiliation (Africa, the Middle East, Europe, Central/South Asia, East Asia, Oceania, and the Americas) or admixture status (Afro-European). Latino individuals were included in the Americas analysis, as they were genotyped concurrently with the Native American data set. First- and second-degree relative pairs in the Africa analysis are reported in Tables S13 and S14, respectively. Monozygotic, first-degree, and second-degree relative pairs in the Oceania analysis are reported in Tables S15, S16, and S17, respectively. Second-degree relative pairs in the Americas analysis are reported in Table S19.

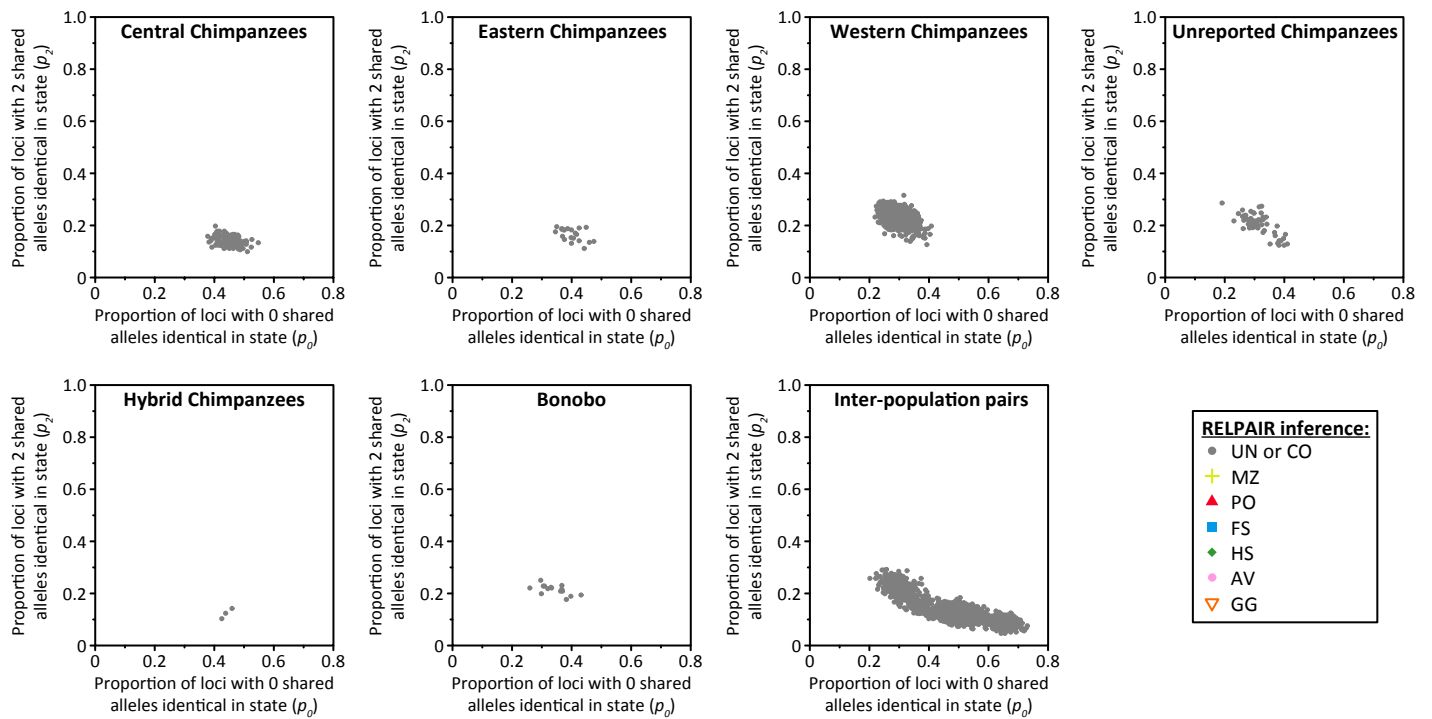

**Figure S7** Intra- and inter-population allele-sharing for pairs of individuals in the chimpanzee data set.



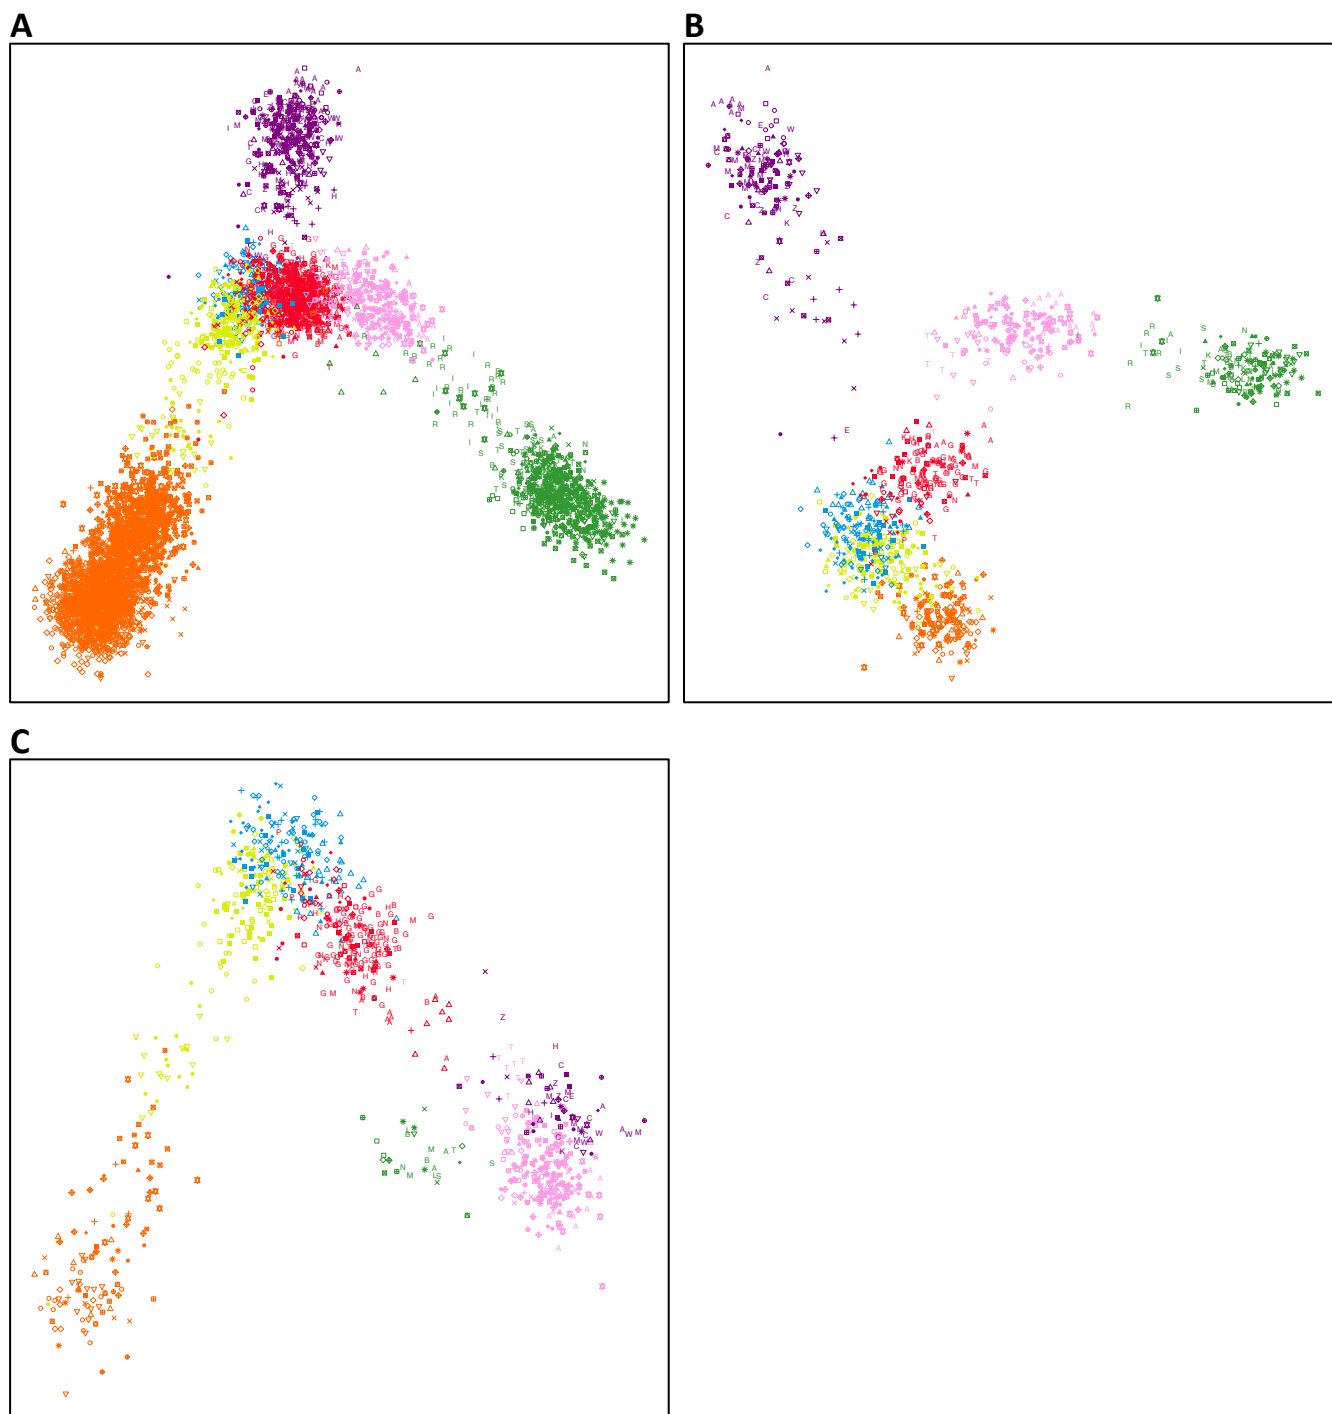

**Figure S8** The effect of sample size on population patterns in worldwide multidimensional scaling (MDS) analyses. Procrustes-transformed MDS representations of pairwise allele-sharing distances between (A) 5063 non-admixed individuals in the MS5435 data set, (B) 1106 non-admixed individuals from the MS5435 data set where each geographic region is represented by a random sample of 158 individuals—the smallest sample size across geographic regions—with membership to that region, and (C) 952 non-admixed individuals from the MS5435 data set where each geographic region is represented by the same number of individuals as in subset H952 of the HGDP-CEPH data set [1], chosen at random from all individuals with membership to that region. Individuals are colored by geographic affiliation and indicated by the symbols in Figure 2.

**File S1**

**Genotype data sets**

File S1 is a Zip archive containing the genotype data of the combined human data set of 5795 individuals and the combined human-chimpanzee data set of 5879 individuals in the format used by the Structure program, along with a list of individual memberships in the subsets described in the paper

File S1 is available for download at <http://www.g3journal.org/lookup/suppl/doi:10.1534/g3.113.005728/-/DC1>

**Table S1** Allele size adjustments used to make the Pacific Islander data set comparable to the combined HGDP-CEPH, Native American, Latino, Jewish, Asian Indian, and CGP data set

| ID in combined data set | ID in Pacific Islander data set | Amount added to genotypes in the Pacific Islander data set (c*) |
|-------------------------|---------------------------------|-----------------------------------------------------------------|
| AAT107_16               | AAT107Z                         | -53                                                             |
| AAT200_1                | AAT200ZP                        | -137                                                            |
| AATA019_8               | AATA019ZP                       | -131                                                            |
| ATA50C05_6              | ATA50C05ZP                      | 116                                                             |
| ATA70B03P_14            | ATA70B03ZP                      | -124                                                            |
| ATA77F05_14             | ATA77F05Z                       | 74                                                              |
| D10S1221                | ATA21A03Z                       | 73                                                              |
| D10S1412                | ATA31G11P                       | -7                                                              |
| D10S1430                | GATA84C01ZP                     | -39                                                             |
| D11S1304                | UT2095M                         | -1                                                              |
| D11S1392                | GATA6B09P                       | -7                                                              |
| D11S1984                | GGAA17G05P                      | -7                                                              |
| D11S1998                | GATA23E06L                      | -3                                                              |
| D11S1999                | GATA23F06L                      | -3                                                              |
| D11S2000                | GATA28D01M                      | -1                                                              |
| D12S1042                | ATA27A06P                       | -7                                                              |
| D12S1045                | ATA29A06P                       | -7                                                              |
| D12S1052                | GATA26D02M                      | -1                                                              |
| D12S1064                | GATA63D12P                      | -7                                                              |
| D12S1300                | GATA85A04M                      | -1                                                              |
| D12S1301                | GATA91H06M                      | -1                                                              |
| D12S2070                | ATA25F09M                       | -1                                                              |
| D13S1807                | GATA11C08P                      | -7                                                              |
| D13S787                 | GATA23C03P                      | -7                                                              |
| D13S796 <sup>a</sup>    | GATA51B02ZP                     | -46                                                             |
| D13S895                 | GGAA22G01ZP                     | 17                                                              |
| D14S608                 | GATA43H01M                      | -1                                                              |
| D14S617                 | GGAA21G11L                      | -2                                                              |
| D15S1515                | GATA197B10P                     | -7                                                              |
| D15S816                 | GATA73F01M                      | -1                                                              |
| D16S2624                | GATA81D12M                      | -1                                                              |
| D16S3253                | GATA22F09P                      | -7                                                              |
| D17S1298                | GAAT2C03P                       | -7                                                              |
| D17S2180                | ATC6A06M                        | -1                                                              |
| D17S2195                | ATA58A02P                       | -7                                                              |
| D18S1376 <sup>b</sup>   | GATA185C06Z                     | -17                                                             |
| D19S589                 | GATA29B01L                      | 1                                                               |
| D19S591                 | GATA44F10P                      | -7                                                              |
| D1S1596                 | GATA26G09P                      | -7                                                              |
| D1S1612                 | GGAA3A07M                       | -1                                                              |
| D1S1627                 | ATA25E07M                       | -1                                                              |
| D1S1728                 | GATA109Z                        | -130                                                            |
| D1S3669                 | GATA29A05P                      | -7                                                              |
| D20S477                 | GATA29F06Z                      | -1                                                              |
| D21S1411                | UT1355Z                         | -3                                                              |

|                      |              |      |
|----------------------|--------------|------|
| D2S686               | GGAA10F06M   | -1   |
| D2S1352              | ATA27D04P    | -7   |
| D2S1363              | GATA23D03ZP  | -107 |
| D2S1384              | GATA52A04M   | -1   |
| D2S1391              | GATA65C03M   | -1   |
| D2S1394              | GATA69E12M   | -1   |
| D2S1400              | GGAA20G10M   | -1   |
| D2S2944              | GATA30E06P   | -7   |
| D2S2968              | GATA178G09M  | -1   |
| D3S1744 <sup>c</sup> | GATA3C02ZP   | -26  |
| D3S1768              | GATA8B05M    | -1   |
| D3S2427              | GATA22F11NZ  | 58   |
| D3S2432              | GATA27C08P   | -7   |
| D3S4529              | GATA128C02M  | -1   |
| D4S1627              | GATA7D01ZP   | 37   |
| D4S1652              | GATA5B02M    | -1   |
| D4S2366              | GATA22G05M   | -1   |
| D4S2397              | ATA27C07P    | -7   |
| D4S2417              | GATA42H02P   | -8   |
| D4S2623              | GATA62A12Z   | -35  |
| D4S2632              | GATA72G09Z   | 25   |
| D5S1456              | GATA11A11P   | -7   |
| D5S1462              | GATA3H06M    | -1   |
| D5S1470              | GATA7C06M    | -1   |
| D5S1480              | ATA23A10M    | -1   |
| D5S1725 <sup>d</sup> | GATA89G08Z   | 31   |
| D5S2488              | ATA20G07M    | -1   |
| D6S1017              | GGAT3H10M    | -1   |
| D6S1027              | ATA22G07P    | -7   |
| D6S2436              | GATA165G02M  | -1   |
| D7S1802              | GATA41G07M   | -1   |
| D7S1818              | GATA24D12P   | -7   |
| D7S2204              | GATA73D10L   | 4    |
| D7S2477              | 035XB9ZP     | -70  |
| D7S3056              | GATA24F03ZP  | 7    |
| D7S3070              | GATA189C06M  | -1   |
| D8S1048              | UT7129L      | 1    |
| D8S1110              | GATA8G10M    | -1   |
| D8S1132              | GATA26E03M   | -1   |
| D8S1477 <sup>e</sup> | GGAA20C10Z   | -104 |
| D8S373               | UT721M       | -1   |
| D8S592               | GATA6B02P    | -7   |
| D9S1120              | GATA81C04M   | -1   |
| D9S2169              | GATA62F03M   | -1   |
| D9S910               | ATA18A07M    | -1   |
| GATA138B05_5         | GATA138B05ZP | 49   |
| GATA169E06_14        | GATA169E06ZP | 38   |
| GATA66D01_2          | GATA66D01ZP  | -110 |
| GGAA30H04_14         | GGAA30H04ZP  | -103 |
| NA.D18S.1            | GATA178F11Z  | 67   |

|          |             |    |
|----------|-------------|----|
| NA.D1S.3 | GATA133A08Q | -4 |
| TPO.D2S  | SRAP        | -7 |

---

<sup>a</sup>Friedlaender *et al.* [2] used an adjustment of -45 nt.

<sup>b</sup>This locus was not present in the list of adjusted loci reported by Friedlaender *et al.* [2].

<sup>c</sup>Friedlaender *et al.* [2] used an adjustment of -25 nt.

<sup>d</sup>Friedlaender *et al.* [2] used an adjustment of 27 nt.

<sup>e</sup>Friedlaender *et al.* [2] used an adjustment of -103 nt.

**Table S2** Allele size adjustments used to make the African data set comparable to the combined HGDP-CEPH, Native American, Latino, Jewish, Asian Indian, CGP, and Pacific Islander data set

| ID in combined data set | ID in African data set | Amount added to genotypes in the African data set (c*) |
|-------------------------|------------------------|--------------------------------------------------------|
| D10S1412                | ATA31G11P              | -7                                                     |
| D11S1304                | UT2095M                | -1                                                     |
| D11S1392                | GATA6B09P              | -7                                                     |
| D11S1984                | GGAA17G05P             | -7                                                     |
| D11S1998                | GATA23E06L             | -3                                                     |
| D11S1999                | GATA23F06L             | -3                                                     |
| D11S2000                | GATA28D01M             | -1                                                     |
| D12S1042                | ATA27A06P              | -7                                                     |
| D12S1045                | ATA29A06P              | -7                                                     |
| D12S1052                | GATA26D02M             | -1                                                     |
| D12S1064                | GATA63D12P             | -7                                                     |
| D12S1300                | GATA85A04M             | -1                                                     |
| D12S1301                | GATA91H06M             | -1                                                     |
| D12S2070                | ATA25F09M              | -1                                                     |
| D13S1807                | GATA11C08P             | -7                                                     |
| D13S787                 | GATA23C03P             | -7                                                     |
| D13S796                 | GATA51B02M             | -1                                                     |
| D14S608                 | GATA43H01M             | -1                                                     |
| D14S617                 | GGAA21G11L             | -2                                                     |
| D15S1515                | GATA197B10P            | -7                                                     |
| D15S816                 | GATA73F01M             | -1                                                     |
| D16S2624                | GATA81D12M             | -1                                                     |
| D16S3253                | GATA22F09P             | -7                                                     |
| D17S1298                | GAAT2C03P              | -7                                                     |
| D17S2180                | ATC6A06M               | -1                                                     |
| D17S2195                | ATA58A02P              | -7                                                     |
| D18S1376 <sup>a</sup>   | GATA185C06Z            | -17                                                    |
| D19S589                 | GATA29B01L             | 1                                                      |
| D19S591                 | GATA44F10P             | -7                                                     |
| D1S1596                 | GATA26G09P             | -7                                                     |
| D1S1612                 | GGAA3A07M              | -1                                                     |
| D1S1627                 | ATA25E07M              | -1                                                     |
| D1S3669                 | GATA29A05P             | -7                                                     |
| D20S477                 | GATA29F06Z             | -1                                                     |
| D22S686                 | GGAA10F06M             | -1                                                     |
| D2S1352                 | ATA27D04P              | -7                                                     |
| D2S1384                 | GATA52A04M             | -1                                                     |
| D2S1391                 | GATA65C03M             | -1                                                     |
| D2S1394                 | GATA69E12M             | -1                                                     |
| D2S1400                 | GGAA20G10M             | -1                                                     |
| D2S2944                 | GATA30E06P             | -7                                                     |
| D2S2968                 | GATA178G09M            | -1                                                     |
| D3S1744                 | GATA3C02M              | -1                                                     |
| D3S1768                 | GATA8B05M              | -1                                                     |
| D3S2427                 | GATA22F11NZ            | 58                                                     |

|                      |             |    |
|----------------------|-------------|----|
| D3S2432              | GATA27C08P  | -7 |
| D3S4529              | GATA128C02M | -1 |
| D4S1627              | GATA7D01ZP  | 37 |
| D4S1652              | GATA5B02M   | -1 |
| D4S2366              | GATA22G05M  | -1 |
| D4S2397              | ATA27C07P   | -7 |
| D4S2417              | GATA42H02P  | -8 |
| D5S1456              | GATA11A11P  | -7 |
| D5S1462              | GATA3H06M   | -1 |
| D5S1470              | GATA7C06M   | -1 |
| D5S1480              | ATA23A10M   | -1 |
| D5S1725 <sup>b</sup> | GATA89G08Z  | 31 |
| D5S2488              | ATA20G07M   | -1 |
| D6S1017              | GGAT3H10M   | -1 |
| D6S1027              | ATA22G07P   | -7 |
| D6S2436              | GATA165G02M | -1 |
| D7S1802              | GATA41G07M  | -1 |
| D7S1818              | GATA24D12P  | -7 |
| D7S2204              | GATA73D10L  | 4  |
| D7S3070              | GATA189C06M | -1 |
| D8S1048              | UT7129L     | 1  |
| D8S1110              | GATA8G10M   | -1 |
| D8S1132              | GATA26E03M  | -1 |
| D8S1477              | GGAA20C10M  | -1 |
| D8S373               | UT721M      | -1 |
| D8S592               | GATA6B02P   | -7 |
| D9S1120              | GATA81C04M  | -1 |
| D9S2169              | GATA62F03M  | -1 |
| D9S910               | ATA18A07M   | -1 |
| NA.D18S.1            | GATA178F11Z | 67 |
| NA.D1S.3             | GATA133A08Q | -4 |
| TPO.D2S              | SRAP        | -7 |

<sup>a</sup>This locus was not present in the list of adjusted loci reported by Tishkoff *et al.* [3].

<sup>b</sup>Tishkoff *et al.* [3] used an adjustment of 27 nt.

**Table S3** 11 loci excluded from the combined data set of 656 loci due to >10% missing data

| <b>Locus ID</b> | <b>Fraction of individuals with missing genotypes</b> |
|-----------------|-------------------------------------------------------|
| D2S1780         | 0.287                                                 |
| D9S938          | 0.192                                                 |
| GTTTT002        | 0.188                                                 |
| AGAT135         | 0.177                                                 |
| AAT258          | 0.175                                                 |
| NA.D1S.1        | 0.171                                                 |
| D1S2134         | 0.167                                                 |
| AAT267          | 0.161                                                 |
| AGAT017         | 0.157                                                 |
| D1S3721         | 0.147                                                 |
| D3S2432         | 0.147                                                 |



**Table S4** 68 individuals excluded from the combined data set of 5916 individuals due to >27.5% missing data

| ID   | Population          |                    | Identification number<br>of individual | Fraction of loci with<br>missing genotypes |
|------|---------------------|--------------------|----------------------------------------|--------------------------------------------|
|      | Name                | Data set of origin |                                        |                                            |
| 1009 | Mengen              | Pacific Islander   | 14131                                  | 0.868                                      |
| 1009 | Mengen              | Pacific Islander   | 14141                                  | 0.786                                      |
| 1116 | Ngumba              | African            | 70753                                  | 0.586                                      |
| 1280 | Temani              | African            | 103376                                 | 0.524                                      |
| 1278 | Dogon               | African            | 103335                                 | 0.513                                      |
| 1280 | Temani              | African            | 103372                                 | 0.510                                      |
| 811  | Chipewyan           | Native American    | 2384                                   | 0.501                                      |
| 1013 | Nakanai (Bileki)    | Pacific Islander   | 15241                                  | 0.491                                      |
| 845  | Ticuna (Arara)      | Native American    | 2547                                   | 0.490                                      |
| 1022 | Tolai (Kabakada)    | Pacific Islander   | 22071                                  | 0.478                                      |
| 824  | Zapotec             | Native American    | 2091                                   | 0.471                                      |
| 1017 | Ata (Uasilau)       | Pacific Islander   | 7003                                   | 0.471                                      |
| 1272 | Cape Mixed Ancestry | African            | 103215                                 | 0.468                                      |
| 1005 | Anem (Keraiai)      | Pacific Islander   | 4031                                   | 0.457                                      |
| 1268 | Nuer                | African            | 73132                                  | 0.457                                      |
| 884  | Catamarca           | Latino             | 2154                                   | 0.456                                      |
| 1273 | Venda               | African            | 103242                                 | 0.456                                      |
| 1254 | Wimbum              | African            | 72932                                  | 0.451                                      |
| 871  | Oriente             | Latino             | 2219                                   | 0.440                                      |
| 822  | Mixtec              | Native American    | 2042                                   | 0.434                                      |
| 1034 | Teop                | Pacific Islander   | 35111                                  | 0.434                                      |
| 843  | Inga                | Native American    | 2509                                   | 0.431                                      |
| 831  | Guaymi              | Native American    | 2009                                   | 0.420                                      |
| 690  | Tundra Nentsi       | Native American    | 2457                                   | 0.419                                      |
| 1271 | Sara (Various)      | African            | 73026                                  | 0.419                                      |
| 1278 | Dogon               | African            | 103333                                 | 0.419                                      |
| 1241 | Maasai (Ilchamus)   | African            | 72708                                  | 0.411                                      |
| 1272 | Cape Mixed Ancestry | African            | 103216                                 | 0.411                                      |
| 837  | Kaingang            | Native American    | 2757                                   | 0.408                                      |
| 824  | Zapotec             | Native American    | 2082                                   | 0.406                                      |
| 831  | Guaymi              | Native American    | 2003                                   | 0.398                                      |
| 884  | Catamarca           | Latino             | 2150                                   | 0.398                                      |
| 836  | Ache                | Native American    | 2742                                   | 0.389                                      |
| 1235 | Gabra               | African            | 72527                                  | 0.388                                      |
| 1278 | Dogon               | African            | 103339                                 | 0.386                                      |
| 1278 | Dogon               | African            | 103352                                 | 0.383                                      |
| 1276 | Koma                | African            | 103304                                 | 0.369                                      |
| 1278 | Dogon               | African            | 103332                                 | 0.367                                      |
| 1012 | Kol                 | Pacific Islander   | 8281                                   | 0.364                                      |
| 1274 | !Xun/Kxoe           | African            | 103258                                 | 0.364                                      |
| 849  | Arhuaco             | Native American    | 2733                                   | 0.363                                      |
| 1280 | Temani              | African            | 103385                                 | 0.353                                      |
| 1272 | Cape Mixed Ancestry | African            | 103186                                 | 0.349                                      |
| 836  | Ache                | Native American    | 2737                                   | 0.347                                      |
| 1273 | Venda               | African            | 103248                                 | 0.346                                      |
| 1101 | Hadza               | African            | 71463                                  | 0.343                                      |
| 54   | Hazara              | HGDP-CEPH          | 127                                    | 0.341                                      |

|      |                     |                  |          |       |
|------|---------------------|------------------|----------|-------|
| 1022 | Tolai (Kabakada)    | Pacific Islander | 22041    | 0.341 |
| 812  | Cree                | Native American  | 2403     | 0.340 |
| 1272 | Cape Mixed Ancestry | African          | 103211   | 0.340 |
| 1274 | !Xun/Kxoe           | African          | 103260   | 0.338 |
| 514  | Punjabi             | Asian Indian     | 63000346 | 0.333 |
| 57   | Makrani             | HGDP-CEPH        | 139      | 0.332 |
| 837  | Kaingang            | Native American  | 2756     | 0.332 |
| 1272 | Cape Mixed Ancestry | African          | 103206   | 0.330 |
| 1275 | Xhosa               | African          | 103287   | 0.326 |
| 1101 | Hadza               | African          | 71454    | 0.322 |
| 845  | Ticuna (Arara)      | Native American  | 2541     | 0.316 |
| 834  | Huilliche           | Native American  | 2122     | 0.313 |
| 1276 | Koma                | African          | 103306   | 0.305 |
| 901  | Ashkenazi Jewish    | Jewish           | 2315     | 0.301 |
| 1011 | Sulka (Watwat)      | Pacific Islander | 21163    | 0.299 |
| 841  | Kogi                | Native American  | 2472     | 0.298 |
| 1107 | Burunge             | African          | 70347    | 0.290 |
| 1259 | Baluba              | African          | 73014    | 0.288 |
| 1272 | Cape Mixed Ancestry | African          | 103210   | 0.287 |
| 1278 | Dogon               | African          | 103343   | 0.279 |
| 1229 | Kikuyu              | African          | 72381    | 0.278 |

**Table S5** Two previously unreported intra-population first-degree relative pairs in the African data set

| Population |            | Identification number |                      | RELPAIR inference:<br>parent/offspring (PO)<br>or full-sibling (FS) | Support for inference:<br>RELPAIR (R) or<br>allele-sharing (A) |
|------------|------------|-----------------------|----------------------|---------------------------------------------------------------------|----------------------------------------------------------------|
| ID         | Name       | First<br>individual   | Second<br>individual |                                                                     |                                                                |
| 1222       | Australian | 79193                 | 79195                | PO                                                                  | R,A                                                            |
| 1114       | Bedzan     | 71580                 | 71584                | FS                                                                  | R <sup>†</sup>                                                 |

<sup>†</sup> Allele-sharing suggests this pair is a second-degree relative pair (Figure S1). However, in the RELPAIR analysis, the likelihood ratio statistic for all other relative types was <0.0001 for this pair. To be conservative, this pair was treated as a first-degree relative pair when creating the standardized subsets MS5547 and MS5435.

**Table S6** 12 previously unreported intra-population second-degree relative pairs in the African data set

| Population |               | Identification number |                      | RELPAIR inference:<br>Avuncular (AV),<br>grandparental (GG),<br>or half-sibling (HS) | Support for inference:<br>RELPAIR (R) or<br>allele-sharing (A) |
|------------|---------------|-----------------------|----------------------|--------------------------------------------------------------------------------------|----------------------------------------------------------------|
| ID         | Name          | First<br>individual   | Second<br>individual |                                                                                      |                                                                |
| 1132       | Podokwo       | 73033                 | 72886                | AV                                                                                   | R,A                                                            |
| 1110       | Pare          | 70446                 | 70452                | GG                                                                                   | R,A                                                            |
| 1114       | Bedzan        | 71578                 | 70672                | GG                                                                                   | R,A                                                            |
| 1127       | Bamoun        | 71053                 | 71054                | GG                                                                                   | R,A                                                            |
| 1222       | Australian    | 79194                 | 79195                | GG                                                                                   | R,A                                                            |
| 1239       | Pokot         | 72632                 | 72636                | GG                                                                                   | R,A                                                            |
| 1101       | Hadza         | 70030                 | 70027                | HS                                                                                   | R,A                                                            |
| 1101       | Hadza         | 70047                 | 70038                | HS                                                                                   | R,A                                                            |
| 1101       | Hadza         | 70048                 | 70071                | HS                                                                                   | R,A                                                            |
| 1101       | Hadza         | 71474                 | 70079                | HS                                                                                   | R,A                                                            |
| 1103       | Iraqw         | 70207                 | 70204                | HS                                                                                   | R,A                                                            |
| 1200       | Tikar (South) | 71729                 | 71731                | HS                                                                                   | R,A                                                            |

**Table S7** Two previously unreported intra-population first-degree relative pairs in the Latino data set

| Population |        | Identification number |                      | RELPAIR inference:<br>parent/offspring (PO)<br>or full-sibling (FS) | Support for inference:<br>RELPAIR (R) or<br>allele-sharing (A) |
|------------|--------|-----------------------|----------------------|---------------------------------------------------------------------|----------------------------------------------------------------|
| ID         | Name   | First<br>individual   | Second<br>individual |                                                                     |                                                                |
| 883        | Paposo | 2264                  | 2266                 | PO                                                                  | R,A                                                            |
| 892        | Peque  | 2623                  | 2639                 | FS                                                                  | R,A                                                            |

**Table S8** Four previously unreported intra-population second-degree relative pairs in the Latino data set

| Population |             | Identification number |                      | RELPAIR inference:<br>Avuncular (AV),<br>grandparental (GG),<br>or half-sibling (HS) | Support for inference:<br>RELPAIR (R) or<br>allele-sharing (A) |
|------------|-------------|-----------------------|----------------------|--------------------------------------------------------------------------------------|----------------------------------------------------------------|
| ID         | Name        | First<br>individual   | Second<br>individual |                                                                                      |                                                                |
| 882        | Quetalmahue | 2282                  | 2288                 | AV                                                                                   | R,A                                                            |
| 885        | Salta       | 2169                  | 2180                 | AV                                                                                   | R,A                                                            |
| 883        | Paposo      | 2267                  | 2268                 | HS                                                                                   | R,A                                                            |
| 883        | Paposo      | 2267                  | 2274                 | HS                                                                                   | R,A                                                            |

**Table S9** Six previously unreported intra-population monozygotic pairs in the Pacific Islander data set

| Population |              | Identification number |                   | Support for inference:<br>RELPAIR (R) or<br>allele-sharing (A) |
|------------|--------------|-----------------------|-------------------|----------------------------------------------------------------|
| ID         | Name         | First individual      | Second individual |                                                                |
| 1040       | Micronesians | 53071                 | 53141             | R,A                                                            |
| 1040       | Micronesians | 53081                 | 53151             | R,A                                                            |
| 1040       | Micronesians | 53091                 | 53161             | R,A                                                            |
| 1040       | Micronesians | 53101                 | 53181             | R,A                                                            |
| 1040       | Micronesians | 53111                 | 53191             | R,A                                                            |
| 1040       | Micronesians | 53131                 | 53061             | R,A                                                            |

**Table S10** 127 previously unreported intra-population first-degree relative pairs in the Pacific Islander data set

| Population |                                | Identification number |                   | RELPAIR inference:<br>parent/offspring (PO)<br>or full-sibling (FS) | Support for inference:<br>RELPAIR (R) or<br>allele-sharing (A) |
|------------|--------------------------------|-----------------------|-------------------|---------------------------------------------------------------------|----------------------------------------------------------------|
| ID         | Name                           | First individual      | Second individual |                                                                     |                                                                |
| 1001       | East Highlands (Gimi & Goroka) | 54071                 | 54061             | PO                                                                  | R,A                                                            |
| 1001       | East Highlands (Gimi & Goroka) | 54091                 | 54071             | PO                                                                  | R,A                                                            |
| 1005       | Anem (Keraiai)                 | 4051                  | 4091              | PO                                                                  | R,A                                                            |
| 1005       | Anem (Keraiai)                 | 4061                  | 4051              | PO                                                                  | R,A                                                            |
| 1005       | Anem (Keraiai)                 | 4141                  | 4021              | PO                                                                  | R,A                                                            |
| 1006       | Anem (Purailing)               | 5041                  | 5061              | PO                                                                  | R,A                                                            |
| 1006       | Anem (Purailing)               | 5053                  | 5061              | PO                                                                  | R,A                                                            |
| 1007       | Mangseng                       | 12021                 | 12111             | PO                                                                  | R,A                                                            |
| 1007       | Mangseng                       | 12041                 | 12091             | PO                                                                  | R,A                                                            |
| 1008       | Melamela                       | 13071                 | 13111             | PO                                                                  | R,A                                                            |
| 1010       | Sulka (Ganai)                  | 20171                 | 20193             | PO                                                                  | R,A                                                            |
| 1010       | Sulka (Ganai)                  | 20171                 | 20201             | PO                                                                  | R,A                                                            |
| 1012       | Kol                            | 8021                  | 8071              | PO                                                                  | R,A                                                            |
| 1012       | Kol                            | 8113                  | 8051              | PO                                                                  | R,A                                                            |
| 1014       | Nakanai (Loso)                 | 16001                 | 16041             | PO                                                                  | R,A                                                            |
| 1014       | Nakanai (Loso)                 | 16131                 | 16061             | PO                                                                  | R,A                                                            |
| 1016       | Mamusi (Lingite)               | 11121                 | 11101             | PO                                                                  | R,A                                                            |
| 1018       | Ata (Lugei)                    | 6013                  | 6123              | PO                                                                  | R,A                                                            |
| 1018       | Ata (Lugei)                    | 6161                  | 6231              | PO                                                                  | R,A                                                            |
| 1020       | Baining (Marabu)               | 18191                 | 18111             | PO                                                                  | R,A                                                            |
| 1020       | Baining (Marabu)               | 18221                 | 18153             | PO                                                                  | R,A                                                            |
| 1020       | Baining (Marabu)               | 18241                 | 18021             | PO                                                                  | R,A                                                            |
| 1020       | Baining (Marabu)               | 18241                 | 18041             | PO                                                                  | R,A                                                            |
| 1023       | Tolai (Vunairoto)              | 23212                 | 23214             | PO                                                                  | R,A                                                            |
| 1023       | Tolai (Vunairoto)              | 23213                 | 23212             | PO                                                                  | R,A                                                            |
| 1024       | Mussau                         | 27041                 | 27201             | PO                                                                  | R,A                                                            |
| 1024       | Mussau                         | 27201                 | 27101             | PO                                                                  | R,A                                                            |
| 1024       | Mussau                         | 27221                 | 27181             | PO                                                                  | R,A                                                            |
| 1025       | Lavongai (North)               | 25033                 | 25001             | PO                                                                  | R,A                                                            |
| 1025       | Lavongai (North)               | 25041                 | 25181             | PO                                                                  | R,A                                                            |
| 1025       | Lavongai (North)               | 25051                 | 25121             | PO                                                                  | R,A                                                            |
| 1026       | Lavongai (South)               | 26141                 | 26154             | PO                                                                  | R,A                                                            |
| 1026       | Lavongai (South)               | 26141                 | 26171             | PO                                                                  | R,A                                                            |
| 1026       | Lavongai (South)               | 26231                 | 26201             | PO                                                                  | R,A                                                            |
| 1028       | Nalik                          | 31071                 | 31101             | PO                                                                  | R,A                                                            |
| 1028       | Nalik                          | 31071                 | 31111             | PO                                                                  | R,A                                                            |
| 1028       | Nalik                          | 31161                 | 31173             | PO                                                                  | R,A                                                            |
| 1028       | Nalik                          | 31161                 | 31193             | PO                                                                  | R,A                                                            |
| 1029       | Notsi                          | 32131                 | 32171             | PO                                                                  | R,A                                                            |
| 1029       | Notsi                          | 32143                 | 32181             | PO                                                                  | R,A                                                            |
| 1030       | Kuot (Kabil)                   | 28101                 | 28211             | PO                                                                  | R,A                                                            |
| 1032       | Madak                          | 30021                 | 30081             | PO                                                                  | R,A                                                            |
| 1032       | Madak                          | 30053                 | 30221             | PO                                                                  | R,A                                                            |
| 1032       | Madak                          | 30211                 | 30161             | PO                                                                  | R,A                                                            |
| 1034       | Teop                           | 35061                 | 35221             | PO                                                                  | R,A                                                            |



|      |                    |       |       |    |     |
|------|--------------------|-------|-------|----|-----|
| 1034 | Teop               | 35071 | 35001 | PO | R,A |
| 1034 | Teop               | 35181 | 35211 | PO | R,A |
| 1034 | Teop               | 35201 | 35221 | PO | R,A |
| 1035 | Aita               | 36061 | 36121 | PO | R,A |
| 1035 | Aita               | 36073 | 36003 | PO | R,A |
| 1035 | Aita               | 36073 | 36011 | PO | R,A |
| 1037 | Nasioi             | 663   | 52004 | PO | R,A |
| 1037 | Nasioi             | 52004 | 662   | PO | R,A |
| 1037 | Nasioi             | 52041 | 658   | PO | R,A |
| 1042 | Maoris             | 62161 | 62181 | PO | R,A |
| 1044 | Taruko             | 42161 | 42141 | PO | R,A |
| 1004 | Kove               | 9201  | 9241  | FS | R,A |
| 1005 | Anem (Keraiai)     | 4101  | 4013  | FS | R,A |
| 1006 | Anem (Purailing)   | 5053  | 5041  | FS | R,A |
| 1006 | Anem (Purailing)   | 5071  | 5151  | FS | R,A |
| 1006 | Anem (Purailing)   | 5181  | 5101  | FS | R,A |
| 1007 | Mangseng           | 12021 | 12034 | FS | R,A |
| 1007 | Mangseng           | 12033 | 12021 | FS | R,A |
| 1007 | Mangseng           | 12033 | 12034 | FS | R,A |
| 1007 | Mangseng           | 12131 | 12101 | FS | R,A |
| 1009 | Mengen             | 14001 | 14021 | FS | R,A |
| 1009 | Mengen             | 14081 | 14071 | FS | R,A |
| 1009 | Mengen             | 14111 | 14071 | FS | R,A |
| 1009 | Mengen             | 14111 | 14081 | FS | R,A |
| 1010 | Sulka (Ganai)      | 20013 | 20161 | FS | R,A |
| 1010 | Sulka (Ganai)      | 20031 | 20001 | FS | R,A |
| 1010 | Sulka (Ganai)      | 20201 | 20193 | FS | R,A |
| 1010 | Sulka (Ganai)      | 20241 | 20221 | FS | R,A |
| 1014 | Nakanai (Loso)     | 16051 | 16001 | FS | R,A |
| 1015 | Mamusi (Kisiluvi)  | 10091 | 10161 | FS | R,A |
| 1015 | Mamusi (Kisiluvi)  | 10241 | 10111 | FS | R,A |
| 1016 | Mamusi (Lingite)   | 11011 | 11141 | FS | R,A |
| 1016 | Mamusi (Lingite)   | 11031 | 11131 | FS | R,A |
| 1016 | Mamusi (Lingite)   | 11051 | 11011 | FS | R,A |
| 1016 | Mamusi (Lingite)   | 11051 | 11141 | FS | R,A |
| 1016 | Mamusi (Lingite)   | 11071 | 11031 | FS | R,A |
| 1016 | Mamusi (Lingite)   | 11071 | 11131 | FS | R,A |
| 1016 | Mamusi (Lingite)   | 11091 | 11191 | FS | R,A |
| 1018 | Ata (Lugei)        | 6003  | 6013  | FS | R,A |
| 1018 | Ata (Lugei)        | 6101  | 6071  | FS | R,A |
| 1018 | Ata (Lugei)        | 6181  | 6051  | FS | R,A |
| 1019 | Baining (Malasait) | 17011 | 17211 | FS | R,A |
| 1019 | Baining (Malasait) | 17051 | 17141 | FS | R,A |
| 1019 | Baining (Malasait) | 17091 | 17081 | FS | R,A |
| 1020 | Baining (Marabu)   | 18041 | 18021 | FS | R,A |
| 1020 | Baining (Marabu)   | 18171 | 18131 | FS | R,A |
| 1020 | Baining (Marabu)   | 18171 | 18201 | FS | R,A |
| 1020 | Baining (Marabu)   | 18201 | 18131 | FS | R,A |
| 1020 | Baining (Marabu)   | 18211 | 18001 | FS | R,A |
| 1021 | Baining (Rangulit) | 19011 | 19101 | FS | R,A |

|      |                    |       |       |    |                |
|------|--------------------|-------|-------|----|----------------|
| 1021 | Baining (Rangulit) | 19071 | 19201 | FS | R,A            |
| 1021 | Baining (Rangulit) | 19081 | 19151 | FS | R,A            |
| 1022 | Tolai (Kabakada)   | 22113 | 22091 | FS | R,A            |
| 1022 | Tolai (Kabakada)   | 22113 | 22121 | FS | R,A            |
| 1022 | Tolai (Kabakada)   | 22121 | 22091 | FS | R,A            |
| 1022 | Tolai (Kabakada)   | 22191 | 22211 | FS | R,A            |
| 1023 | Tolai (Vunairoto)  | 23213 | 23214 | FS | R,A            |
| 1024 | Mussau             | 27081 | 27031 | FS | R,A            |
| 1026 | Lavongai (South)   | 26171 | 26154 | FS | R,A            |
| 1028 | Nalik              | 31101 | 31111 | FS | R,A            |
| 1028 | Nalik              | 31134 | 31031 | FS | R,A            |
| 1028 | Nalik              | 31144 | 31121 | FS | R,A            |
| 1029 | Notsi              | 32061 | 32081 | FS | R,A            |
| 1029 | Notsi              | 32061 | 32091 | FS | R,A            |
| 1029 | Notsi              | 32091 | 32081 | FS | R,A            |
| 1030 | Kuot (Kabil)       | 28031 | 28021 | FS | R,A            |
| 1030 | Kuot (Kabil)       | 28091 | 28073 | FS | R,A            |
| 1031 | Kuot (Lamalaua)    | 29171 | 29001 | FS | R,A            |
| 1032 | Madak              | 30061 | 30171 | FS | R,A            |
| 1032 | Madak              | 30061 | 30221 | FS | R,A            |
| 1032 | Madak              | 30221 | 30171 | FS | R,A            |
| 1033 | Saposa             | 34021 | 34121 | FS | R,A            |
| 1035 | Aita               | 36021 | 36151 | FS | R,A            |
| 1035 | Aita               | 36031 | 36081 | FS | R,A            |
| 1035 | Aita               | 36221 | 36231 | FS | R,A            |
| 1037 | Nasioi             | 52004 | 490   | FS | R,A            |
| 1037 | Nasioi             | 52041 | 664   | FS | R,A            |
| 1042 | Maoris             | 62011 | 62171 | FS | R,A            |
| 1042 | Maoris             | 62221 | 62011 | FS | R,A            |
| 1042 | Maoris             | 62221 | 62171 | FS | R,A            |
| 1043 | Ami                | 47181 | 47221 | FS | R <sup>†</sup> |
| 1043 | Ami                | 47211 | 47191 | FS | R,A            |

<sup>†</sup>Allele-sharing suggests this pair is a second-degree relative pair (Figure S3). In the RELPAIR analysis, the likelihood ratio statistic for HS was the next highest after FS for this pair. To be conservative, this pair was treated as a first-degree relative pair when creating the standardized subsets MS5547 and MS5435.

**Table S11** 87 previously unreported intra-population second-degree relative pairs in the Pacific Islander data set

| Population |                                | Identification number |                   | RELPAIR inference:<br>Avuncular (AV),<br>grandparental (GG),<br>or half-sibling (HS) | Support for inference:<br>RELPAIR (R) or<br>allele-sharing (A) |
|------------|--------------------------------|-----------------------|-------------------|--------------------------------------------------------------------------------------|----------------------------------------------------------------|
| ID         | Name                           | First individual      | Second individual |                                                                                      |                                                                |
| 1001       | East Highlands (Gimi & Goroka) | 54001                 | 54011             | AV                                                                                   | R,A                                                            |
| 1004       | Kove                           | 9111                  | 9221              | AV                                                                                   | R,A                                                            |
| 1004       | Kove                           | 9151                  | 9031              | AV                                                                                   | R,A                                                            |
| 1007       | Mangseng                       | 12053                 | 12041             | AV                                                                                   | R,A                                                            |
| 1007       | Mangseng                       | 12121                 | 12071             | AV                                                                                   | R,A                                                            |
| 1008       | Melamela                       | 13001                 | 13181             | AV                                                                                   | R,A                                                            |
| 1011       | Sulka (Watwat)                 | 21081                 | 21031             | AV                                                                                   | R,A                                                            |
| 1012       | Kol                            | 8171                  | 8161              | AV                                                                                   | R,A                                                            |
| 1013       | Nakanai (Bileki)               | 15111                 | 15151             | AV                                                                                   | R,A                                                            |
| 1015       | Mamusi (Kisiluvi)              | 10061                 | 10241             | AV                                                                                   | R,A                                                            |
| 1015       | Mamusi (Kisiluvi)              | 10211                 | 10121             | AV                                                                                   | R,A                                                            |
| 1015       | Mamusi (Kisiluvi)              | 10241                 | 10121             | AV                                                                                   | R,A                                                            |
| 1017       | Ata (Uasilau)                  | 7131                  | 7181              | AV                                                                                   | R,A                                                            |
| 1018       | Ata (Lugei)                    | 6003                  | 6123              | AV                                                                                   | R,A                                                            |
| 1018       | Ata (Lugei)                    | 6021                  | 6201              | AV                                                                                   | R,A                                                            |
| 1019       | Baining (Malasait)             | 17161                 | 17201             | AV                                                                                   | R,A                                                            |
| 1020       | Baining (Marabu)               | 18031                 | 18131             | AV                                                                                   | R,A                                                            |
| 1021       | Baining (Rangulit)             | 19001                 | 19021             | AV                                                                                   | R,A                                                            |
| 1021       | Baining (Rangulit)             | 19111                 | 19081             | AV                                                                                   | R,A                                                            |
| 1023       | Tolai (Vunairoto)              | 23071                 | 23131             | AV                                                                                   | R,A                                                            |
| 1025       | Lavongai (North)               | 25041                 | 25001             | AV                                                                                   | R,A                                                            |
| 1025       | Lavongai (North)               | 25121                 | 25091             | AV                                                                                   | R,A                                                            |
| 1026       | Lavongai (South)               | 26011                 | 26091             | AV                                                                                   | R,A                                                            |
| 1028       | Nalik                          | 31211                 | 31121             | AV                                                                                   | R,A                                                            |
| 1030       | Kuot (Kabil)                   | 28073                 | 28171             | AV                                                                                   | R,A                                                            |
| 1030       | Kuot (Kabil)                   | 28081                 | 28181             | AV                                                                                   | R,A                                                            |
| 1030       | Kuot (Kabil)                   | 28091                 | 28171             | AV                                                                                   | R,A                                                            |
| 1031       | Kuot (Lamalaua)                | 29041                 | 29131             | AV                                                                                   | R,A                                                            |
| 1032       | Madak                          | 30191                 | 30104             | AV                                                                                   | R,A                                                            |
| 1033       | Saposa                         | 34011                 | 34041             | AV                                                                                   | R,A                                                            |
| 1033       | Saposa                         | 34033                 | 34151             | AV                                                                                   | R,A                                                            |
| 1033       | Saposa                         | 34111                 | 34231             | AV                                                                                   | R,A                                                            |
| 1033       | Saposa                         | 34171                 | 34191             | AV                                                                                   | R,A                                                            |
| 1034       | Teop                           | 35201                 | 35211             | AV                                                                                   | R,A                                                            |
| 1035       | Aita                           | 36051                 | 36211             | AV                                                                                   | R,A                                                            |
| 1037       | Nasioi                         | 825                   | 823               | AV                                                                                   | R,A                                                            |
| 1044       | Taruko                         | 42151                 | 42201             | AV                                                                                   | R,A                                                            |
| 1004       | Kove                           | 9091                  | 9121              | GG                                                                                   | R,A                                                            |
| 1005       | Anem (Keraiai)                 | 4081                  | 4051              | GG                                                                                   | R,A                                                            |
| 1005       | Anem (Keraiai)                 | 4141                  | 4131              | GG                                                                                   | R,A                                                            |
| 1006       | Anem (Purailing)               | 5181                  | 5083              | GG                                                                                   | R,A                                                            |
| 1008       | Melamela                       | 13051                 | 13141             | GG                                                                                   | R,A                                                            |
| 1008       | Melamela                       | 13091                 | 13193             | GG                                                                                   | R,A                                                            |
| 1008       | Melamela                       | 13131                 | 13211             | GG                                                                                   | R,A                                                            |
| 1008       | Melamela                       | 13231                 | 13141             | GG                                                                                   | R,A                                                            |

|      |                    |       |       |    |     |
|------|--------------------|-------|-------|----|-----|
| 1013 | Nakanai (Bileki)   | 15121 | 15235 | GG | R,A |
| 1013 | Nakanai (Bileki)   | 15161 | 15121 | GG | R,A |
| 1014 | Nakanai (Loso)     | 16051 | 16023 | GG | R,A |
| 1018 | Ata (Lugei)        | 6181  | 6041  | GG | R,A |
| 1020 | Baining (Marabu)   | 18051 | 18191 | GG | R,A |
| 1020 | Baining (Marabu)   | 18171 | 18031 | GG | R,A |
| 1020 | Baining (Marabu)   | 18221 | 18241 | GG | R,A |
| 1021 | Baining (Rangulit) | 19111 | 19101 | GG | R,A |
| 1027 | Tigak              | 33081 | 33051 | GG | R,A |
| 1028 | Nalik              | 31051 | 31144 | GG | R,A |
| 1031 | Kuot (Lamalaua)    | 29091 | 29131 | GG | R,A |
| 1032 | Madak              | 30081 | 30141 | GG | R,A |
| 1032 | Madak              | 30184 | 30111 | GG | R,A |
| 1034 | Teop               | 35043 | 35051 | GG | R,A |
| 1034 | Teop               | 35201 | 35061 | GG | R,A |
| 1035 | Aita               | 36151 | 36003 | GG | R,A |
| 1035 | Aita               | 36191 | 36091 | GG | R,A |
| 1004 | Kove               | 9014  | 9133  | HS | R,A |
| 1004 | Kove               | 9091  | 9001  | HS | R,A |
| 1004 | Kove               | 9201  | 9051  | HS | R,A |
| 1005 | Anem (Keraiai)     | 4061  | 4091  | HS | R,A |
| 1005 | Anem (Keraiai)     | 4131  | 4021  | HS | R,A |
| 1005 | Anem (Keraiai)     | 4181  | 4071  | HS | R,A |
| 1010 | Sulka (Ganai)      | 20161 | 20072 | HS | R,A |
| 1012 | Kol                | 8001  | 8081  | HS | R,A |
| 1013 | Nakanai (Bileki)   | 15063 | 15221 | HS | R,A |
| 1013 | Nakanai (Bileki)   | 15211 | 15204 | HS | R,A |
| 1015 | Mamusi (Kisiluvi)  | 10121 | 10111 | HS | R,A |
| 1018 | Ata (Lugei)        | 6081  | 6031  | HS | R,A |
| 1022 | Tolai (Kabakada)   | 22231 | 22051 | HS | R,A |
| 1023 | Tolai (Vunairoto)  | 23142 | 23143 | HS | R,A |
| 1026 | Lavongai (South)   | 26121 | 26091 | HS | R,A |
| 1026 | Lavongai (South)   | 26191 | 26211 | HS | R,A |
| 1028 | Nalik              | 31211 | 31144 | HS | R,A |
| 1030 | Kuot (Kabil)       | 28141 | 28081 | HS | R,A |
| 1032 | Madak              | 30081 | 30171 | HS | R,A |
| 1032 | Madak              | 30231 | 30072 | HS | R,A |
| 1033 | Saposa             | 34071 | 34151 | HS | R,A |
| 1034 | Teop               | 35024 | 35001 | HS | R,A |
| 1035 | Aita               | 36003 | 36161 | HS | R,A |
| 1035 | Aita               | 36021 | 36003 | HS | R,A |
| 1044 | Taruko             | 42141 | 42111 | HS | R,A |

**Table S12** 13 previously unreported intra-population parent/parent/offspring trios in the Pacific Islander data set

| Population |                                | Identification number |          |           | Support for inference:<br>RELPAIR (R) or<br>allele-sharing (A) |
|------------|--------------------------------|-----------------------|----------|-----------|----------------------------------------------------------------|
| ID         | Name                           | Parent 1              | Parent 2 | Offspring |                                                                |
| 1001       | East Highlands (Gimi & Goroka) | 54061                 | 54091    | 54071     | R,A                                                            |
| 1005       | Anem (Keraiai)                 | 4061                  | 4091     | 4051      | R,A                                                            |
| 1006       | Anem (Purailing)               | 5041                  | 5053     | 5061      | R,A                                                            |
| 1010       | Sulka (Ganai)                  | 20193                 | 20201    | 20171     | R,A                                                            |
| 1020       | Baining (Marabu)               | 18021                 | 18041    | 18241     | R,A                                                            |
| 1023       | Tolai (Vunairoto)              | 23213                 | 23214    | 23212     | R,A                                                            |
| 1024       | Mussau                         | 27041                 | 27101    | 27201     | R,A                                                            |
| 1026       | Lavongai (South)               | 26154                 | 26171    | 26141     | R,A                                                            |
| 1028       | Nalik                          | 31101                 | 31111    | 31071     | R,A                                                            |
| 1028       | Nalik                          | 31173                 | 31193    | 31161     | R,A                                                            |
| 1034       | Teop                           | 35061                 | 35201    | 35221     | R,A                                                            |
| 1035       | Aita                           | 36003                 | 36011    | 36073     | R,A                                                            |
| 1037       | Nasioi                         | 662                   | 663      | 52004     | R,A                                                            |

**Table S13** One previously unreported inter-population first-degree relative pair in the African data set

| First Individual |       |                          | Second Individual |      |                          | RELPAIR inference:<br>parent/offspring (PO)<br>or full-sibling (FS) | Support for inference:<br>RELPAIR (R) or<br>allele-sharing (A) |
|------------------|-------|--------------------------|-------------------|------|--------------------------|---------------------------------------------------------------------|----------------------------------------------------------------|
| Population       |       | Identification<br>number | Population        |      | Identification<br>number |                                                                     |                                                                |
| ID               | Name  |                          | ID                | Name |                          |                                                                     |                                                                |
| 1191             | Dinka | 71432                    | 1276              | Koma | 103309                   | FS                                                                  | R,A                                                            |

**Table S14** One previously unreported inter-population second-degree relative pair in the African data set

| First Individual |        |                          | Second Individual |      |                          | RELPAIR inference:<br>Avuncular (AV),<br>grandparental (GG),<br>or half-sibling (HS) | Support for inference:<br>RELPAIR (R) or<br>allele-sharing (A) |
|------------------|--------|--------------------------|-------------------|------|--------------------------|--------------------------------------------------------------------------------------|----------------------------------------------------------------|
| Population       |        | Identification<br>number | Population        |      | Identification<br>number |                                                                                      |                                                                |
| ID               | Name   |                          | ID                | Name |                          |                                                                                      |                                                                |
| 1113             | Bakola | 70618                    | 1115              | Mvae | 70717                    | HS                                                                                   | R,A                                                            |

**Table S15** Two previously unreported inter-population monozygotic pairs in the Pacific Islander data set

| First individual |              |                          | Second individual |                  |                          | Support for inference:<br>RELPAIR (R) or<br>allele-sharing (A) |
|------------------|--------------|--------------------------|-------------------|------------------|--------------------------|----------------------------------------------------------------|
| Population       |              | Identification<br>number | Population        |                  | Identification<br>number |                                                                |
| ID               | Name         |                          | ID                | Name             |                          |                                                                |
| 1018             | Ata (Lugei)  | 6021                     | 1026              | Lavongai (North) | 26051                    | R,A                                                            |
| 1040             | Micronesians | 53171                    | 1041              | Samoans          | 55001                    | R,A                                                            |



**Table S16** 24 previously unreported inter-population first-degree relative pairs in the Pacific Islander data set

| First individual |                          |       | Second individual |                          |       | RELP AIR inference:<br>parent/offspring (PO)<br>or full-sibling (FS) | Support for inference:<br>RELP AIR (R) or<br>allele-sharing (A) |
|------------------|--------------------------|-------|-------------------|--------------------------|-------|----------------------------------------------------------------------|-----------------------------------------------------------------|
| Population       | Identification<br>number | ID    | Population        | Identification<br>number | ID    |                                                                      |                                                                 |
| 1003             | Sepik                    | 3091  | 1026              | Lavongai (North)         | 26163 | PO                                                                   | R,A                                                             |
| 1003             | Sepik                    | 3191  | 1029              | Madak                    | 32161 | PO                                                                   | R,A                                                             |
| 1003             | Sepik                    | 3171  | 1032              | Notsi                    | 30201 | PO                                                                   | R,A                                                             |
| 1005             | Anem (Keraiai)           | 4021  | 1006              | Anem (Purailing)         | 5021  | PO                                                                   | R,A                                                             |
| 1005             | Anem (Keraiai)           | 4081  | 1006              | Anem (Purailing)         | 5011  | PO                                                                   | R,A                                                             |
| 1005             | Anem (Keraiai)           | 4181  | 1006              | Anem (Purailing)         | 5111  | PO                                                                   | R,A                                                             |
| 1005             | Anem (Keraiai)           | 4201  | 1006              | Anem (Purailing)         | 5101  | PO                                                                   | R,A                                                             |
| 1005             | Anem (Keraiai)           | 4201  | 1006              | Anem (Purailing)         | 5181  | PO                                                                   | R,A                                                             |
| 1010             | Sulka (Ganai)            | 20101 | 1011              | Sulka (Watwat)           | 21081 | PO                                                                   | R,A                                                             |
| 1015             | Mamusi (Kisiluvi)        | 10103 | 1016              | Mamusi (Lingite)         | 11081 | PO                                                                   | R,A                                                             |
| 1022             | Tolai (Kabakada)         | 22131 | 1023              | Tolai (Vunairoto)        | 23212 | PO                                                                   | R,A                                                             |
| 1028             | Nalik                    | 31221 | 1029              | Notsi                    | 32021 | PO                                                                   | R,A                                                             |
| 1005             | Anem (Keraiai)           | 4114  | 1006              | Anem (Purailing)         | 5091  | FS                                                                   | R,A                                                             |
| 1010             | Sulka (Ganai)            | 20091 | 1011              | Sulka (Watwat)           | 21101 | FS                                                                   | R,A                                                             |
| 1014             | Nakanai (Loso)           | 16061 | 1018              | Ata (Lugei)              | 6211  | FS                                                                   | R,A                                                             |
| 1015             | Mamusi (Kisiluvi)        | 10051 | 1016              | Mamusi (Lingite)         | 11031 | FS                                                                   | R,A                                                             |
| 1015             | Mamusi (Kisiluvi)        | 10051 | 1016              | Mamusi (Lingite)         | 11071 | FS                                                                   | R,A                                                             |
| 1015             | Mamusi (Kisiluvi)        | 10051 | 1016              | Mamusi (Lingite)         | 11131 | FS                                                                   | R,A                                                             |
| 1015             | Mamusi (Kisiluvi)        | 10181 | 1016              | Mamusi (Lingite)         | 11221 | FS                                                                   | R <sup>†</sup>                                                  |
| 1022             | Tolai (Kabakada)         | 22091 | 1023              | Tolai (Vunairoto)        | 23152 | FS                                                                   | R,A                                                             |
| 1022             | Tolai (Kabakada)         | 22113 | 1023              | Tolai (Vunairoto)        | 23152 | FS                                                                   | R,A                                                             |
| 1022             | Tolai (Kabakada)         | 22121 | 1023              | Tolai (Vunairoto)        | 23152 | FS                                                                   | R,A                                                             |
| 1022             | Tolai (Kabakada)         | 22131 | 1023              | Tolai (Vunairoto)        | 23213 | FS                                                                   | R,A                                                             |
| 1022             | Tolai (Kabakada)         | 22131 | 1023              | Tolai (Vunairoto)        | 23214 | FS                                                                   | R,A                                                             |

<sup>†</sup> Allele-sharing suggests this pair is a second-degree relative pair (Figure S6). In the RELPAIR analysis, the likelihood ratio statistic for AV was the next highest after FS for this pair. To be conservative, this pair was treated as a first-degree relative pair when creating the MS5795 and MS5879 data sets.

**Table S17** 54 previously unreported inter-population second-degree relative pairs in the Pacific Islander data set

| First individual |                    |        | Second individual |                    |       | RELP AIR inference:<br>Avuncular (AV),<br>grandparental (GG),<br>or half-sibling (HS) | Support for inference:<br>RELP AIR (R) or<br>allele-sharing (A) |
|------------------|--------------------|--------|-------------------|--------------------|-------|---------------------------------------------------------------------------------------|-----------------------------------------------------------------|
| Population       | Identification     |        | Population        | Identification     |       |                                                                                       |                                                                 |
| ID               | Name               | number | Name              | number             |       |                                                                                       |                                                                 |
| 1005             | Anem (Keraiai)     | 4001   | 1006              | Anem (Purailing)   | 5031  | AV                                                                                    | R,A                                                             |
| 1005             | Anem (Keraiai)     | 4051   | 1006              | Anem (Purailing)   | 5091  | AV                                                                                    | R,A                                                             |
| 1005             | Anem (Keraiai)     | 4071   | 1006              | Anem (Purailing)   | 5191  | AV                                                                                    | R,A                                                             |
| 1005             | Anem (Keraiai)     | 4131   | 1006              | Anem (Purailing)   | 5021  | AV                                                                                    | R,A                                                             |
| 1005             | Anem (Keraiai)     | 4181   | 1006              | Anem (Purailing)   | 5191  | AV                                                                                    | R,A                                                             |
| 1005             | Anem (Keraiai)     | 4191   | 1006              | Anem (Purailing)   | 5083  | AV                                                                                    | R,A                                                             |
| 1005             | Anem (Keraiai)     | 4191   | 1006              | Anem (Purailing)   | 5101  | AV                                                                                    | R,A                                                             |
| 1007             | Mangseng           | 12011  | 1013              | Nakanai (Bileki)   | 15001 | AV                                                                                    | R,A                                                             |
| 1009             | Mengen             | 14201  | 1012              | Kol                | 8261  | AV                                                                                    | R,A                                                             |
| 1010             | Sulka (Ganai)      | 20041  | 1011              | Sulka (Watwat)     | 21021 | AV                                                                                    | R,A                                                             |
| 1010             | Sulka (Ganai)      | 20171  | 1011              | Sulka (Watwat)     | 21021 | AV                                                                                    | R,A                                                             |
| 1010             | Sulka (Ganai)      | 20131  | 1027              | Tigak              | 33241 | AV                                                                                    | R,A                                                             |
| 1014             | Nakanai (Loso)     | 16161  | 1015              | Mamusi (Kisiluvi)  | 10091 | AV                                                                                    | R,A                                                             |
| 1014             | Nakanai (Loso)     | 16161  | 1015              | Mamusi (Kisiluvi)  | 10161 | AV                                                                                    | R,A                                                             |
| 1014             | Nakanai (Loso)     | 16131  | 1018              | Ata (Lugei)        | 6211  | AV                                                                                    | R,A                                                             |
| 1015             | Mamusi (Kisiluvi)  | 10041  | 1016              | Mamusi (Lingite)   | 11081 | AV                                                                                    | R,A                                                             |
| 1015             | Mamusi (Kisiluvi)  | 10071  | 1016              | Mamusi (Lingite)   | 11031 | AV                                                                                    | R,A                                                             |
| 1015             | Mamusi (Kisiluvi)  | 10071  | 1016              | Mamusi (Lingite)   | 11071 | AV                                                                                    | R,A                                                             |
| 1015             | Mamusi (Kisiluvi)  | 10071  | 1016              | Mamusi (Lingite)   | 11131 | AV                                                                                    | R,A                                                             |
| 1015             | Mamusi (Kisiluvi)  | 10181  | 1016              | Mamusi (Lingite)   | 11231 | AV                                                                                    | R,A                                                             |
| 1015             | Mamusi (Kisiluvi)  | 10191  | 1016              | Mamusi (Lingite)   | 11021 | AV                                                                                    | R,A                                                             |
| 1015             | Mamusi (Kisiluvi)  | 10201  | 1016              | Mamusi (Lingite)   | 11175 | AV                                                                                    | R,A                                                             |
| 1015             | Mamusi (Kisiluvi)  | 10231  | 1016              | Mamusi (Lingite)   | 11043 | AV                                                                                    | R,A                                                             |
| 1018             | Ata (Lugei)        | 6201   | 1026              | Lavongai (South)   | 26051 | AV                                                                                    | R,A                                                             |
| 1019             | Baining (Malasait) | 17001  | 1021              | Baining (Rangulit) | 19141 | AV                                                                                    | R,A                                                             |
| 1019             | Baining (Malasait) | 17031  | 1021              | Baining (Rangulit) | 19181 | AV                                                                                    | R,A                                                             |
| 1019             | Baining (Malasait) | 17051  | 1021              | Baining (Rangulit) | 19071 | AV                                                                                    | R,A                                                             |
| 1019             | Baining (Malasait) | 17051  | 1021              | Baining (Rangulit) | 19201 | AV                                                                                    | R,A                                                             |
| 1019             | Baining (Malasait) | 17081  | 1021              | Baining (Rangulit) | 19171 | AV                                                                                    | R,A                                                             |
| 1019             | Baining (Malasait) | 17141  | 1021              | Baining (Rangulit) | 19071 | AV                                                                                    | R,A                                                             |

|      |                    |       |      |                    |       |    |     |
|------|--------------------|-------|------|--------------------|-------|----|-----|
| 1019 | Baining (Malasait) | 17141 | 1021 | Baining (Rangulit) | 19201 | AV | R,A |
| 1019 | Baining (Malasait) | 17151 | 1021 | Baining (Rangulit) | 19201 | AV | R,A |
| 1019 | Baining (Malasait) | 17211 | 1021 | Baining (Rangulit) | 19131 | AV | R,A |
| 1019 | Baining (Malasait) | 17221 | 1021 | Baining (Rangulit) | 19051 | AV | R,A |
| 1019 | Baining (Malasait) | 17221 | 1021 | Baining (Rangulit) | 19181 | AV | R,A |
| 1019 | Baining (Malasait) | 17241 | 1021 | Baining (Rangulit) | 19181 | AV | R,A |
| 1022 | Tolai (Kabakada)   | 22001 | 1023 | Tolai (Vunairoto)  | 23171 | AV | R,A |
| 1022 | Tolai (Kabakada)   | 22161 | 1023 | Tolai (Vunairoto)  | 23201 | AV | R,A |
| 1022 | Tolai (Kabakada)   | 22211 | 1023 | Tolai (Vunairoto)  | 23152 | AV | R,A |
| 1024 | Mussau             | 27051 | 1030 | Kuot (Kabil)       | 28201 | AV | R,A |
| 1027 | Tigak              | 33021 | 1029 | Notsi              | 32223 | AV | R,A |
| 1027 | Tigak              | 33051 | 1029 | Notsi              | 32231 | AV | R,A |
| 1028 | Nalik              | 31181 | 1029 | Notsi              | 32021 | AV | R,A |
| 1028 | Nalik              | 31121 | 1030 | Kuot (Kabil)       | 28151 | AV | R,A |
| 1028 | Nalik              | 31144 | 1030 | Kuot (Kabil)       | 28151 | AV | R,A |
| 1029 | Notsi              | 32211 | 1032 | Madak              | 30091 | AV | R,A |
| 1005 | Anem (Keraiai)     | 4161  | 1006 | Anem (Purailing)   | 5061  | GG | R,A |
| 1005 | Anem (Keraiai)     | 4181  | 1006 | Anem (Purailing)   | 5131  | GG | R,A |
| 1015 | Mamusi (Kisiluvi)  | 10173 | 1016 | Mamusi (Lingite)   | 11151 | GG | R,A |
| 1026 | Lavongai (South)   | 26081 | 1030 | Kuot (Kabil)       | 28031 | GG | R,A |
| 1005 | Anem (Keraiai)     | 4001  | 1006 | Anem (Purailing)   | 5141  | HS | R,A |
| 1005 | Anem (Keraiai)     | 4191  | 1006 | Anem (Purailing)   | 5181  | HS | R,A |
| 1022 | Tolai (Kabakada)   | 22191 | 1023 | Tolai (Vunairoto)  | 23152 | HS | R,A |
| 1026 | Lavongai (South)   | 26081 | 1030 | Kuot (Kabil)       | 28021 | HS | R,A |

**Table S18** Three previously unreported inter-population parent/parent/offspring trios in the Pacific Islander data set

| Parent 1   |                  |                | Parent 2   |                   |                | Offspring  |                   |                | Support for inference:<br>RELPAIR (R) or<br>allele-sharing (A) |
|------------|------------------|----------------|------------|-------------------|----------------|------------|-------------------|----------------|----------------------------------------------------------------|
| Population |                  | Identification | Population |                   | Identification | Population |                   | Identification |                                                                |
| ID         | Name             | number         | ID         | Name              | number         | ID         | Name              | number         |                                                                |
| 1005       | Anem (Keraiai)   | 4141           | 1006       | Anem (Purailing)  | 5021           | 1005       | Anem (Keraiai)    | 4021           | R,A                                                            |
| 1006       | Anem (Purailing) | 5101           | 1006       | Anem (Purailing)  | 5181           | 1005       | Anem (Keraiai)    | 4201           | R,A                                                            |
| 1022       | Tolai (Kabakada) | 22131          | 1023       | Tolai (Vunairoto) | 23213          | 1023       | Tolai (Vunairoto) | 23212          | R,A                                                            |

**Table S19** 10 previously unreported inter-population second-degree relative pairs in the Native American data set

| First individual |                |                          | Second individual |                   |                          | RELPAIR inference:<br>Avuncular (AV),<br>grandparental (GG),<br>or half-sibling (HS) | Support for inference:<br>RELPAIR (R) or<br>allele-sharing (A) |
|------------------|----------------|--------------------------|-------------------|-------------------|--------------------------|--------------------------------------------------------------------------------------|----------------------------------------------------------------|
| Population       |                | Identification<br>number | Population        |                   | Identification<br>number |                                                                                      |                                                                |
| ID               | Name           |                          | ID                | Name              |                          |                                                                                      |                                                                |
| 841              | Kogi           | 2463                     | 849               | Arhuaco           | 2157                     | AV                                                                                   | R,A                                                            |
| 841              | Kogi           | 2463                     | 849               | Arhuaco           | 2158                     | AV                                                                                   | R,A                                                            |
| 841              | Kogi           | 2463                     | 849               | Arhuaco           | 2159                     | AV                                                                                   | R,A                                                            |
| 841              | Kogi           | 2463                     | 849               | Arhuaco           | 2160                     | AV                                                                                   | R,A                                                            |
| 841              | Kogi           | 2463                     | 849               | Arhuaco           | 2419                     | AV                                                                                   | R,A                                                            |
| 841              | Kogi           | 2463                     | 849               | Arhuaco           | 2420                     | AV                                                                                   | R,A                                                            |
| 841              | Kogi           | 2463                     | 849               | Arhuaco           | 2578                     | AV                                                                                   | R,A                                                            |
| 841              | Kogi           | 2463                     | 849               | Arhuaco           | 2732                     | AV                                                                                   | R,A                                                            |
| 845              | Ticuna (Arara) | 2543                     | 846               | Ticuna (Tarapaca) | 2794                     | AV                                                                                   | R,A                                                            |
| 845              | Ticuna (Arara) | 2545                     | 846               | Ticuna (Tarapaca) | 2794                     | AV                                                                                   | R,A                                                            |

**Table S20** 267 human populations present in the combined data set together with their geographic coordinates, sample sizes, and mean heterozygosities

| Population      |                   | Location                 | Geographic region  | Latitude<br>[Degrees North] | Longitude<br>[Degrees East] | Sample size |        |        | Unbiased heterozygosity |                | Source |
|-----------------|-------------------|--------------------------|--------------------|-----------------------------|-----------------------------|-------------|--------|--------|-------------------------|----------------|--------|
| ID              | Name              |                          |                    |                             |                             | MS5795      | MS5547 | MS5435 | Mean                    | SD across loci |        |
| 20              | Orcadian          | Orkney Islands           | Europe             | 59                          | -3                          | 16          | 15     | 15     | 0.724                   | 0.096          | [4-6]  |
| 21              | Adygei            | Russia (Caucasus)        | Europe             | 44                          | 39                          | 17          | 17     | 17     | 0.728                   | 0.088          | [4-6]  |
| 22              | Russian           | Russia                   | Europe             | 61                          | 40                          | 25          | 25     | 25     | 0.731                   | 0.084          | [4-6]  |
| 24              | Basque            | France                   | Europe             | 43                          | 0                           | 24          | 24     | 24     | 0.718                   | 0.096          | [4-6]  |
| 25              | French            | France                   | Europe             | 46                          | 2                           | 29          | 28     | 28     | 0.730                   | 0.083          | [4-6]  |
| 27              | Italian           | Italy (Bergamo)          | Europe             | 46                          | 10                          | 13          | 13     | 13     | 0.727                   | 0.095          | [4-6]  |
| 28              | Sardinian         | Italy                    | Europe             | 40                          | 9                           | 28          | 28     | 28     | 0.723                   | 0.086          | [4-6]  |
| 29              | Tuscan            | Italy                    | Europe             | 43                          | 11                          | 8           | 8      | 8      | 0.735                   | 0.109          | [4-6]  |
| 34              | Mozabite          | Algeria (Mzab)           | Middle East        | 32                          | 3                           | 30          | 29     | 29     | 0.738                   | 0.082          | [4-6]  |
| 36              | Bedouin           | Israel (Negev)           | Middle East        | 31                          | 35                          | 48          | 47     | 46     | 0.734                   | 0.078          | [4-6]  |
| 37              | Druze             | Israel (Carmel)          | Middle East        | 32                          | 35                          | 47          | 44     | 42     | 0.722                   | 0.085          | [4-6]  |
| 38              | Palestinian       | Israel (Central)         | Middle East        | 32                          | 35                          | 51          | 50     | 46     | 0.732                   | 0.080          | [4-6]  |
| 50              | Balochi           | Pakistan                 | Central/South Asia | 30.49871492                 | 66.5                        | 25          | 24     | 24     | 0.733                   | 0.084          | [4-6]  |
| 51              | Brahui            | Pakistan                 | Central/South Asia | 30.49871492                 | 66.5                        | 25          | 25     | 25     | 0.730                   | 0.087          | [4-6]  |
| 52              | Burusho           | Pakistan                 | Central/South Asia | 36.49838568                 | 74                          | 25          | 25     | 25     | 0.729                   | 0.085          | [4-6]  |
| 54              | Hazara            | Pakistan                 | Central/South Asia | 33.49855601                 | 70                          | 23          | 22     | 21     | 0.728                   | 0.093          | [4-6]  |
| 56              | Kalash            | Pakistan                 | Central/South Asia | 35.99366014                 | 71.5                        | 25          | 24     | 23     | 0.698                   | 0.112          | [4-6]  |
| 57              | Makrani           | Pakistan                 | Central/South Asia | 26                          | 64                          | 24          | 24     | 24     | 0.737                   | 0.086          | [4-6]  |
| 58              | Pathan            | Pakistan                 | Central/South Asia | 33.48700562                 | 70.5                        | 24          | 24     | 24     | 0.734                   | 0.088          | [4-6]  |
| 59              | Sindhi            | Pakistan                 | Central/South Asia | 25.49063551                 | 69                          | 25          | 24     | 24     | 0.733                   | 0.084          | [4-6]  |
| 81 <sup>a</sup> | Piapoco           | Colombia                 | America            | 3                           | -68                         | 13          | 7      | 7      | 0.625                   | 0.162          | [4-6]  |
| 82              | Karitiana         | Brazil                   | America            | -10                         | -63                         | 24          | 14     | 14     | 0.561                   | 0.178          | [4-6]  |
| 83              | Surui             | Brazil                   | America            | -11                         | -62                         | 21          | 9      | 8      | 0.507                   | 0.203          | [4-6]  |
| 86              | Maya              | Mexico                   | America            | 19                          | -91                         | 25          | 22     | 21     | 0.676                   | 0.122          | [4-6]  |
| 87              | Pima              | Mexico                   | America            | 29                          | -108                        | 25          | 14     | 14     | 0.617                   | 0.161          | [4-6]  |
| 430             | Bantu (S. Africa) | Southern Africa          | Africa             | -25.56926433                | 24.25                       | 8           | 8      | 8      | 0.765                   | 0.103          | [4-6]  |
| 441             | Bantu (Kenya)     | Kenya                    | Africa             | -3                          | 37                          | 12          | 11     | 11     | 0.758                   | 0.097          | [4-6]  |
| 464             | Mandenka          | Senegal                  | Africa             | 12                          | -12                         | 24          | 24     | 22     | 0.753                   | 0.085          | [4-6]  |
| 465             | Yoruba            | Nigeria                  | Africa             | 7.995094727                 | 5                           | 25          | 22     | 22     | 0.760                   | 0.083          | [4-6]  |
| 488             | Biaka Pygmy       | Central African Republic | Africa             | 4                           | 17                          | 32          | 27     | 23     | 0.758                   | 0.084          | [4-6]  |
| 489             | Mbuti Pygmy       | Congo                    | Africa             | 1                           | 29                          | 15          | 13     | 13     | 0.752                   | 0.099          | [4-6]  |
| 494             | San               | Namibia                  | Africa             | -21                         | 20                          | 7           | 6      | 6      | 0.745                   | 0.128          | [4-6]  |

|     |                |            |                    |             |        |    |    |    |       |       |       |
|-----|----------------|------------|--------------------|-------------|--------|----|----|----|-------|-------|-------|
| 601 | Han            | China      | East Asia          | 32.26566812 | 114    | 34 | 34 | 34 | 0.708 | 0.105 | [4-6] |
| 602 | Han (N. China) | China      | East Asia          | 32.26566812 | 114    | 10 | 10 | 10 | 0.714 | 0.117 | [4-6] |
| 606 | Dai            | China      | East Asia          | 21          | 100    | 10 | 10 | 10 | 0.700 | 0.133 | [4-6] |
| 607 | Daur           | China      | East Asia          | 48.49753416 | 124    | 10 | 10 | 10 | 0.711 | 0.119 | [4-6] |
| 608 | Hezhen         | China      | East Asia          | 47.4976192  | 133.5  | 9  | 9  | 9  | 0.707 | 0.119 | [4-6] |
| 611 | Lahu           | China      | East Asia          | 22          | 100    | 10 | 8  | 8  | 0.688 | 0.139 | [4-6] |
| 612 | Miao           | China      | East Asia          | 28          | 109    | 10 | 10 | 10 | 0.700 | 0.127 | [4-6] |
| 613 | Oroqen         | China      | East Asia          | 50.43389257 | 126.5  | 10 | 9  | 9  | 0.696 | 0.130 | [4-6] |
| 615 | She            | China      | East Asia          | 27          | 119    | 10 | 10 | 10 | 0.694 | 0.122 | [4-6] |
| 616 | Tujia          | China      | East Asia          | 29          | 109    | 10 | 10 | 10 | 0.702 | 0.127 | [4-6] |
| 617 | Tu             | China      | East Asia          | 36          | 101    | 10 | 10 | 10 | 0.707 | 0.118 | [4-6] |
| 618 | Xibo           | China      | East Asia          | 43.49792973 | 81.5   | 9  | 9  | 9  | 0.709 | 0.126 | [4-6] |
| 619 | Yi             | China      | East Asia          | 28          | 103    | 10 | 10 | 10 | 0.709 | 0.124 | [4-6] |
| 622 | Mongola        | China      | East Asia          | 45          | 111    | 10 | 10 | 10 | 0.711 | 0.122 | [4-6] |
| 625 | Naxi           | China      | East Asia          | 26          | 100    | 10 | 9  | 9  | 0.699 | 0.122 | [4-6] |
| 629 | Uygur          | China      | Central/South Asia | 44          | 81     | 10 | 10 | 10 | 0.733 | 0.108 | [4-6] |
| 677 | Cambodian      | Cambodia   | East Asia          | 12          | 105    | 11 | 10 | 10 | 0.711 | 0.127 | [4-6] |
| 684 | Japanese       | Japan      | East Asia          | 38          | 138    | 29 | 29 | 29 | 0.702 | 0.113 | [4-6] |
| 699 | Yakut          | Siberia    | East Asia          | 62.98287845 | 129.5  | 25 | 25 | 25 | 0.700 | 0.104 | [4-6] |
| 690 | Tundra Nentsi  | Siberia    | East Asia          | 66.08       | 76.5   | 13 | 13 | 13 | 0.716 | 0.105 | [7]   |
| 811 | Chipewyan      | Canada     | America            | 59.55       | -107.3 | 28 | 24 | 17 | 0.671 | 0.115 | [7]   |
| 812 | Cree           | Canada     | America            | 50.33       | -102.5 | 17 | 16 | 16 | 0.695 | 0.116 | [7]   |
| 813 | Ojibwa         | Canada     | America            | 46.5        | -81    | 20 | 16 | 12 | 0.696 | 0.115 | [7]   |
| 821 | Kaqchikel      | Guatemala  | America            | 15          | -91    | 12 | 11 | 11 | 0.665 | 0.138 | [7]   |
| 822 | Mixtec         | Mexico     | America            | 17          | -97    | 19 | 17 | 17 | 0.644 | 0.143 | [7]   |
| 823 | Mixe           | Mexico     | America            | 17          | -96    | 20 | 20 | 20 | 0.641 | 0.134 | [7]   |
| 824 | Zapotec        | Mexico     | America            | 16          | -97    | 17 | 17 | 17 | 0.665 | 0.140 | [7]   |
| 831 | Guaymi         | Panama     | America            | 8.5         | -82    | 16 | 16 | 14 | 0.582 | 0.176 | [7]   |
| 832 | Cabecar        | Costa Rica | America            | 9.5         | -84    | 20 | 19 | 17 | 0.623 | 0.147 | [7]   |
| 833 | Aymara         | Chile      | America            | -22         | -70    | 18 | 18 | 18 | 0.660 | 0.132 | [7]   |
| 834 | Huilliche      | Chile      | America            | -41         | -73    | 19 | 19 | 19 | 0.667 | 0.120 | [7]   |
| 835 | Guarani        | Brazil     | America            | -23         | -54    | 10 | 8  | 8  | 0.649 | 0.146 | [7]   |
| 836 | Ache           | Paraguay   | America            | -24         | -56    | 17 | 16 | 14 | 0.483 | 0.207 | [7]   |
| 837 | Kaingang       | Brazil     | America            | -24         | -52.5  | 5  | 5  | 5  | 0.624 | 0.189 | [7]   |
| 838 | Quechua        | Peru       | America            | -14         | -74    | 20 | 20 | 20 | 0.669 | 0.124 | [7]   |
| 841 | Kogi           | Colombia   | America            | 11          | -74    | 16 | 8  | 7  | 0.580 | 0.180 | [7]   |

|                  |                   |                   |                    |             |             |     |     |     |       |       |          |
|------------------|-------------------|-------------------|--------------------|-------------|-------------|-----|-----|-----|-------|-------|----------|
| 842              | Zenu              | Colombia          | America            | 9           | -75         | 18  | 16  | 13  | 0.643 | 0.143 | [7]      |
| 843              | Inga              | Colombia          | America            | 1           | -77         | 16  | 15  | 14  | 0.640 | 0.140 | [7]      |
| 844              | Wayuu             | Colombia          | America            | 11          | -73         | 17  | 15  | 15  | 0.671 | 0.126 | [7]      |
| 845              | Ticuna (Arara)    | Colombia          | America            | -4          | -70         | 15  | 14  | 14  | 0.590 | 0.163 | [7]      |
| 846              | Ticuna (Tarapaca) | Colombia          | America            | -4          | -70         | 18  | 12  | 10  | 0.587 | 0.175 | [7]      |
| 847              | Embera            | Colombia          | America            | 7           | -76         | 11  | 7   | 7   | 0.625 | 0.158 | [7]      |
| 848              | Waunana           | Colombia          | America            | 5           | -77         | 20  | 12  | 11  | 0.625 | 0.160 | [7]      |
| 849              | Arhuaco           | Colombia          | America            | 11          | -73.8       | 16  | 9   | 9   | 0.633 | 0.148 | [7]      |
| 871              | Oriente           | Guatemala         | Latino             | 14.633333   | -90.516667  | 19  | 19  | 19  | 0.727 | 0.085 | [8]      |
| 872              | Mexico City       | Mexico            | Latino             | 19.4        | -99.2       | 19  | 19  | 19  | 0.732 | 0.088 | [8]      |
| 881              | CVCR              | Costa Rica        | Latino             | 9.933333    | -84.083333  | 20  | 20  | 20  | 0.736 | 0.084 | [8]      |
| 882              | Quetalmahue       | Chile             | Latino             | -41.466667  | -73.533333  | 20  | 20  | 19  | 0.703 | 0.103 | [8]      |
| 883              | Paposo            | Chile             | Latino             | -25.05      | -70.266667  | 20  | 19  | 18  | 0.710 | 0.099 | [8]      |
| 884              | Catamarca         | Argentina         | Latino             | -28.466667  | -65.783333  | 12  | 12  | 12  | 0.723 | 0.101 | [8]      |
| 885              | Salta             | Argentina         | Latino             | -24.783333  | -65.416667  | 19  | 19  | 18  | 0.703 | 0.107 | [8]      |
| 886              | Tucuman           | Argentina         | Latino             | -26.816667  | -65.216667  | 19  | 19  | 19  | 0.737 | 0.086 | [8]      |
| 887              | RGS               | Brazil            | Latino             | -31         | -54         | 20  | 20  | 20  | 0.744 | 0.076 | [8]      |
| 891              | Pasto             | Colombia          | Latino             | 1.216667    | -77.283333  | 19  | 19  | 19  | 0.718 | 0.092 | [8]      |
| 892              | Peque             | Colombia          | Latino             | 7.316667    | -75.833333  | 20  | 19  | 19  | 0.708 | 0.099 | [8]      |
| 893              | Medellin          | Colombia          | Latino             | 6.25        | -75.583333  | 20  | 20  | 20  | 0.738 | 0.082 | [8]      |
| 894              | Cundinamarca      | Colombia          | Latino             | 4.6         | -74.083333  | 19  | 19  | 19  | 0.721 | 0.096 | [8]      |
| 901 <sup>b</sup> | Ashkenazi Jewish  | Israel (Ashkelon) | Europe             | 31.666667   | 34.566667   | 19  | 19  | 19  | 0.732 | 0.088 | [9]      |
| 902 <sup>b</sup> | Moroccan Jewish   | Israel (Ashkelon) | Middle East        | 31.666667   | 34.566667   | 20  | 20  | 20  | 0.728 | 0.089 | [9]      |
| 903 <sup>b</sup> | Tunisian Jewish   | Israel (Ashkelon) | Middle East        | 31.666667   | 34.566667   | 20  | 20  | 18  | 0.722 | 0.095 | [9]      |
| 904 <sup>b</sup> | Turkish Jewish    | Israel (Ashkelon) | Middle East        | 31.666667   | 34.566667   | 20  | 20  | 20  | 0.735 | 0.084 | [9]      |
| 501              | Assamese          | India             | Central/South Asia | 26          | 93          | 25  | 25  | 25  | 0.732 | 0.086 | [10]     |
| 502              | Bengali           | India             | Central/South Asia | 23.25766454 | 87.66666667 | 27  | 27  | 27  | 0.732 | 0.087 | [10]     |
| 504 <sup>c</sup> | Gujarati          | India             | Central/South Asia | 23          | 72          | 252 | 234 | 229 | 0.725 | 0.083 | [10, 11] |
| 505              | Hindi             | India             | Central/South Asia | 26.98091726 | 78.39357143 | 28  | 28  | 28  | 0.729 | 0.087 | [10]     |
| 506              | Kannada           | India             | Central/South Asia | 15          | 75          | 24  | 24  | 24  | 0.731 | 0.088 | [10]     |
| 507              | Kashmiri          | India             | Central/South Asia | 32.44       | 74.54       | 25  | 25  | 25  | 0.735 | 0.087 | [10]     |
| 508              | Konkani           | India             | Central/South Asia | 14.57081522 | 75.13095238 | 42  | 42  | 42  | 0.726 | 0.083 | [10]     |
| 509              | Malayalam         | India             | Central/South Asia | 10          | 76.25       | 25  | 25  | 25  | 0.729 | 0.091 | [10]     |
| 510              | Marathi           | India             | Central/South Asia | 19.81684261 | 75.94230769 | 26  | 26  | 26  | 0.734 | 0.084 | [10]     |
| 511              | Marwari           | India             | Central/South Asia | 26.67171131 | 74.264      | 25  | 25  | 25  | 0.725 | 0.092 | [10]     |
| 512              | Oriya             | India             | Central/South Asia | 20          | 85          | 26  | 26  | 26  | 0.728 | 0.088 | [10]     |



|                   |                                   |             |                    |             |             |    |    |    |       |       |      |
|-------------------|-----------------------------------|-------------|--------------------|-------------|-------------|----|----|----|-------|-------|------|
| 513               | Parsi                             | India       | Central/South Asia | 19          | 72.8        | 25 | 25 | 25 | 0.724 | 0.090 | [10] |
| 514               | Punjabi                           | India       | Central/South Asia | 30.47159766 | 75.29071429 | 27 | 27 | 27 | 0.732 | 0.085 | [10] |
| 515               | Tamil                             | India       | Central/South Asia | 11.10167224 | 77.94827586 | 29 | 29 | 29 | 0.732 | 0.087 | [10] |
| 516               | Telugu                            | India       | Central/South Asia | 15.9257581  | 79.62962963 | 27 | 27 | 27 | 0.727 | 0.091 | [10] |
| 1001 <sup>d</sup> | East Highlands<br>(Gimi & Goroka) | New Guinea  | Oceania            | -6.083      | 145.4       | 29 | 28 | 27 | 0.677 | 0.134 | [2]  |
| 1003              | Sepik                             | New Guinea  | Oceania            | -3.583      | 143.333     | 20 | 20 | 20 | 0.682 | 0.134 | [2]  |
| 1004              | Kove                              | New Britain | Oceania            | -5.4667     | 148.95      | 25 | 24 | 20 | 0.677 | 0.125 | [2]  |
| 1005              | Anem (Keraiai)                    | New Britain | Oceania            | -5.45       | 148.9833    | 16 | 14 | 11 | 0.684 | 0.128 | [2]  |
| 1006              | Anem (Purailing)                  | New Britain | Oceania            | -5.45       | 148.984     | 17 | 14 | 14 | 0.674 | 0.136 | [2]  |
| 1007              | Mangseng                          | New Britain | Oceania            | -5.933      | 150.7       | 20 | 16 | 15 | 0.697 | 0.121 | [2]  |
| 1008              | Melamela                          | New Britain | Oceania            | -5          | 151.25      | 25 | 24 | 20 | 0.685 | 0.119 | [2]  |
| 1009              | Mengen                            | New Britain | Oceania            | -5.1        | 151.4       | 23 | 20 | 20 | 0.688 | 0.129 | [2]  |
| 1010              | Sulka (Ganai)                     | New Britain | Oceania            | -4.5        | 152.333     | 22 | 17 | 17 | 0.689 | 0.128 | [2]  |
| 1011              | Sulka (Watwat)                    | New Britain | Oceania            | -4.483      | 152.3       | 15 | 15 | 14 | 0.686 | 0.136 | [2]  |
| 1012              | Kol                               | New Britain | Oceania            | -5.383      | 151.633     | 20 | 18 | 16 | 0.672 | 0.135 | [2]  |
| 1013              | Nakanai (Bileki)                  | New Britain | Oceania            | -5.75       | 150.8       | 24 | 24 | 20 | 0.686 | 0.123 | [2]  |
| 1014              | Nakanai (Loso)                    | New Britain | Oceania            | -5.483      | 150.8       | 17 | 16 | 15 | 0.657 | 0.135 | [2]  |
| 1015              | Mamusi (Kisiluvi)                 | New Britain | Oceania            | -5.7333     | 151.0833    | 22 | 20 | 19 | 0.655 | 0.138 | [2]  |
| 1016              | Mamusi (Lingite)                  | New Britain | Oceania            | -5.867      | 151.1       | 20 | 16 | 16 | 0.646 | 0.148 | [2]  |
| 1017              | Ata (Uasilau)                     | New Britain | Oceania            | -5.683      | 151         | 24 | 24 | 23 | 0.649 | 0.136 | [2]  |
| 1018              | Ata (Lugei)                       | New Britain | Oceania            | -5.6        | 151         | 23 | 18 | 17 | 0.661 | 0.130 | [2]  |
| 1019              | Baining (Malasait)                | New Britain | Oceania            | -4.467      | 151.9       | 25 | 22 | 21 | 0.620 | 0.155 | [2]  |
| 1020              | Baining (Marabu)                  | New Britain | Oceania            | -4.633      | 152.3       | 25 | 18 | 18 | 0.624 | 0.156 | [2]  |
| 1021              | Baining (Rangulit)                | New Britain | Oceania            | -4.4        | 151.9       | 22 | 19 | 18 | 0.628 | 0.151 | [2]  |
| 1022              | Tolai (Kabakada)                  | New Britain | Oceania            | -4.483      | 152.1       | 18 | 17 | 16 | 0.684 | 0.132 | [2]  |
| 1023              | Tolai (Vunairoto)                 | New Britain | Oceania            | -4.2        | 152.1       | 21 | 21 | 19 | 0.690 | 0.124 | [2]  |
| 1024              | Mussau                            | Mussau      | Oceania            | -1.583      | 149.733     | 25 | 22 | 22 | 0.691 | 0.121 | [2]  |
| 1025              | Lavongai (North)                  | New Hanover | Oceania            | -2.433      | 150.35      | 24 | 21 | 21 | 0.686 | 0.122 | [2]  |
| 1026              | Lavongai (South)                  | New Hanover | Oceania            | -2.5667     | 150.4333    | 22 | 19 | 17 | 0.688 | 0.126 | [2]  |
| 1027              | Tigak                             | New Ireland | Oceania            | -2.6        | 150.87      | 23 | 23 | 22 | 0.691 | 0.120 | [2]  |
| 1028              | Nalik                             | New Ireland | Oceania            | -2.983      | 151.52      | 24 | 19 | 18 | 0.693 | 0.122 | [2]  |
| 1029              | Notsi                             | New Ireland | Oceania            | -3.05       | 151.65      | 23 | 19 | 19 | 0.690 | 0.126 | [2]  |
| 1030              | Kuot (Kabil)                      | New Ireland | Oceania            | -3.067      | 151.7       | 25 | 22 | 20 | 0.684 | 0.124 | [2]  |
| 1031              | Kuot (Lamalaua)                   | New Ireland | Oceania            | -3          | 151.5       | 18 | 17 | 16 | 0.690 | 0.128 | [2]  |
| 1032              | Madak                             | New Ireland | Oceania            | -3.1        | 151.7       | 24 | 20 | 17 | 0.687 | 0.126 | [2]  |

|                   |                   |              |           |         |         |    |    |    |       |       |     |
|-------------------|-------------------|--------------|-----------|---------|---------|----|----|----|-------|-------|-----|
| 1033              | Saposa            | Bougainville | Oceania   | -5.5833 | 154.67  | 25 | 24 | 20 | 0.685 | 0.126 | [2] |
| 1034              | Teop              | Bougainville | Oceania   | -5.85   | 155.18  | 23 | 19 | 18 | 0.690 | 0.128 | [2] |
| 1035              | Aita              | Bougainville | Oceania   | -5.9    | 155.083 | 25 | 19 | 17 | 0.643 | 0.143 | [2] |
| 1037 <sup>e</sup> | Nasioi            | Bougainville | Oceania   | -6.483  | 155.833 | 23 | 14 | 12 | 0.667 | 0.147 | [2] |
| 1040              | Micronesians      | Micronesia   | Oceania   | 12.5    | 150     | 16 | 16 | 16 | 0.693 | 0.123 | [2] |
| 1041              | Samoans           | Polynesia    | Oceania   | -13.35  | -172.2  | 10 | 10 | 10 | 0.680 | 0.142 | [2] |
| 1042              | Maoris            | Polynesia    | Oceania   | -41     | 174     | 30 | 27 | 27 | 0.662 | 0.122 | [2] |
| 1043              | Ami               | Taiwan       | East Asia | 23.3    | 121     | 25 | 23 | 23 | 0.672 | 0.126 | [2] |
| 1044              | Taruko            | Taiwan       | East Asia | 23.3    | 121     | 25 | 24 | 23 | 0.653 | 0.142 | [2] |
| 1101              | Hadza             | Tanzania     | Africa    | -3.8    | 35.3    | 61 | 61 | 57 | 0.730 | 0.092 | [3] |
| 1102              | Sandawe           | Tanzania     | Africa    | -5.5    | 35.5    | 51 | 51 | 51 | 0.763 | 0.074 | [3] |
| 1103              | Iraqw             | Tanzania     | Africa    | -4      | 35.5    | 46 | 46 | 45 | 0.758 | 0.073 | [3] |
| 1104              | Turu              | Tanzania     | Africa    | -5      | 35      | 32 | 32 | 32 | 0.768 | 0.072 | [3] |
| 1105              | Mbugwe            | Tanzania     | Africa    | -3.8    | 35.8    | 21 | 21 | 21 | 0.765 | 0.082 | [3] |
| 1106              | Rangi             | Tanzania     | Africa    | -5      | 36      | 36 | 36 | 36 | 0.765 | 0.077 | [3] |
| 1107              | Burunge           | Tanzania     | Africa    | -5.3    | 36      | 21 | 21 | 21 | 0.767 | 0.082 | [3] |
| 1108              | Maasai (Tanzania) | Tanzania     | Africa    | -4      | 37      | 36 | 36 | 36 | 0.767 | 0.072 | [3] |
| 1109              | Akie              | Tanzania     | Africa    | -5      | 37.5    | 23 | 23 | 23 | 0.756 | 0.087 | [3] |
| 1110              | Pare              | Tanzania     | Africa    | -4.5    | 38      | 23 | 23 | 22 | 0.762 | 0.082 | [3] |
| 1111              | Mbugu             | Tanzania     | Africa    | -4.8    | 38.5    | 22 | 22 | 22 | 0.750 | 0.084 | [3] |
| 1112              | Baka              | Cameroon     | Africa    | 2.5     | 13.5    | 48 | 48 | 48 | 0.761 | 0.083 | [3] |
| 1113              | Bakola            | Cameroon     | Africa    | 2.8     | 10      | 42 | 42 | 42 | 0.760 | 0.082 | [3] |
| 1114              | Bedzan            | Cameroon     | Africa    | 5.5     | 11.6    | 17 | 16 | 15 | 0.756 | 0.094 | [3] |
| 1115              | Mvae              | Cameroon     | Africa    | 3       | 12      | 24 | 24 | 24 | 0.764 | 0.081 | [3] |
| 1116              | Ngumba            | Cameroon     | Africa    | 3       | 10.3    | 26 | 26 | 26 | 0.762 | 0.083 | [3] |
| 1117              | Fulani (Adamawa)  | Cameroon     | Africa    | 9       | 13.5    | 41 | 41 | 41 | 0.755 | 0.078 | [3] |
| 1118              | Kanuri            | Cameroon     | Africa    | 11.3    | 14.3    | 31 | 31 | 31 | 0.760 | 0.079 | [3] |
| 1119              | Mada              | Cameroon     | Africa    | 10.8    | 14.1    | 28 | 28 | 28 | 0.754 | 0.082 | [3] |
| 1120              | Zime              | Cameroon     | Africa    | 9       | 14.5    | 30 | 30 | 30 | 0.763 | 0.082 | [3] |
| 1121              | Ouldeme           | Cameroon     | Africa    | 11      | 14.3    | 26 | 26 | 26 | 0.753 | 0.085 | [3] |
| 1122              | Giziga            | Cameroon     | Africa    | 10.3    | 14.3    | 24 | 24 | 24 | 0.756 | 0.086 | [3] |
| 1123              | Mandara           | Cameroon     | Africa    | 11.3    | 14      | 26 | 26 | 26 | 0.756 | 0.080 | [3] |
| 1124              | Baggara           | Cameroon     | Africa    | 12.5    | 14.5    | 23 | 23 | 23 | 0.758 | 0.079 | [3] |
| 1125              | Kotoko            | Cameroon     | Africa    | 11.8    | 14.8    | 17 | 17 | 17 | 0.756 | 0.086 | [3] |
| 1126              | Zulgo             | Cameroon     | Africa    | 10.8    | 14      | 22 | 22 | 22 | 0.751 | 0.087 | [3] |
| 1127              | Bamoun            | Cameroon     | Africa    | 5.5     | 10.8    | 31 | 31 | 30 | 0.760 | 0.081 | [3] |

|                   |                   |          |               |           |            |    |    |    |       |       |     |
|-------------------|-------------------|----------|---------------|-----------|------------|----|----|----|-------|-------|-----|
| 1128              | Banen             | Cameroon | Africa        | 4.8       | 10.8       | 25 | 25 | 25 | 0.760 | 0.084 | [3] |
| 1129              | Bafia             | Cameroon | Africa        | 4.8       | 11         | 30 | 30 | 30 | 0.762 | 0.082 | [3] |
| 1130              | Lemande           | Cameroon | Africa        | 4.5       | 11         | 26 | 26 | 26 | 0.758 | 0.083 | [3] |
| 1131              | Batanga           | Cameroon | Africa        | 3         | 10         | 20 | 20 | 20 | 0.757 | 0.089 | [3] |
| 1132              | Podokwo           | Cameroon | Africa        | 11        | 12.1       | 30 | 30 | 29 | 0.751 | 0.084 | [3] |
| 1159              | Yoruba            | Nigeria  | Africa        | 8         | 4          | 25 | 25 | 25 | 0.756 | 0.086 | [3] |
| 1185              | Bassange          | Nigeria  | Africa        | 9         | 5.5        | 20 | 20 | 20 | 0.754 | 0.090 | [3] |
| 1186              | Igbo              | Nigeria  | Africa        | 6         | 7          | 28 | 28 | 28 | 0.760 | 0.084 | [3] |
| 1187              | Igala             | Nigeria  | Africa        | 7         | 7          | 17 | 17 | 17 | 0.758 | 0.084 | [3] |
| 1188              | Gwari             | Nigeria  | Africa        | 10        | 7          | 22 | 22 | 22 | 0.758 | 0.086 | [3] |
| 1189              | Hausa (Nigeria)   | Nigeria  | Africa        | 12        | 8          | 16 | 16 | 16 | 0.755 | 0.093 | [3] |
| 1190              | Beja (Banuamir)   | Sudan    | Middle East   | 21        | 36         | 23 | 23 | 23 | 0.752 | 0.080 | [3] |
| 1191              | Dinka             | Sudan    | Africa        | 8         | 30         | 16 | 16 | 16 | 0.750 | 0.090 | [3] |
| 1192              | Datoga            | Tanzania | Africa        | -4.5      | 35.5       | 54 | 54 | 54 | 0.760 | 0.072 | [3] |
| 1193              | Sukuma            | Tanzania | Africa        | -3        | 33.5       | 10 | 10 | 10 | 0.766 | 0.090 | [3] |
| 1194              | Gogo              | Tanzania | Africa        | -6        | 36         | 13 | 13 | 13 | 0.767 | 0.084 | [3] |
| 1195              | Fiome (Gorowa)    | Tanzania | Africa        | -4.3      | 35.8       | 22 | 22 | 22 | 0.762 | 0.081 | [3] |
| 1196              | Iyassa            | Cameroon | Africa        | 2.5       | 9.8        | 37 | 37 | 37 | 0.761 | 0.081 | [3] |
| 1197              | Fang              | Cameroon | Africa        | 2.5       | 13         | 19 | 19 | 19 | 0.759 | 0.087 | [3] |
| 1198              | Mabea             | Cameroon | Africa        | 2.9       | 10.3       | 13 | 13 | 13 | 0.761 | 0.090 | [3] |
| 1199              | Yambassa          | Cameroon | Africa        | 4.8       | 11.3       | 17 | 17 | 17 | 0.758 | 0.090 | [3] |
| 1200              | Tikar (South)     | Cameroon | Africa        | 5.5       | 11.5       | 21 | 21 | 20 | 0.763 | 0.085 | [3] |
| 1201              | Tikar (North)     | Cameroon | Africa        | 6.3       | 11.5       | 13 | 13 | 13 | 0.759 | 0.092 | [3] |
| 1202              | Ntumu             | Cameroon | Africa        | 2.3       | 10.5       | 11 | 11 | 11 | 0.762 | 0.091 | [3] |
| 1203              | Massa             | Cameroon | Africa        | 10.3      | 15.3       | 15 | 15 | 15 | 0.754 | 0.093 | [3] |
| 1204              | Tupuri            | Cameroon | Africa        | 10.3      | 14.8       | 22 | 22 | 22 | 0.757 | 0.086 | [3] |
| 1205              | Bulu              | Cameroon | Africa        | 3         | 11         | 22 | 22 | 22 | 0.765 | 0.081 | [3] |
| 1206              | Ashanti           | Ghana    | Africa        | 6         | -1         | 15 | 15 | 15 | 0.759 | 0.092 | [3] |
| 1207              | Brong             | Ghana    | Africa        | 7.5       | -2         | 26 | 26 | 26 | 0.757 | 0.084 | [3] |
| 1209 <sup>b</sup> | Chicago           | USA      | Afro-European | 41.881944 | -87.627778 | 15 | 15 | 15 | 0.766 | 0.082 | [3] |
| 1210 <sup>b</sup> | Pittsburgh        | USA      | Afro-European | 40.441667 | -80        | 21 | 21 | 21 | 0.766 | 0.079 | [3] |
| 1211 <sup>b</sup> | Baltimore         | USA      | Afro-European | 39.283333 | -76.616667 | 44 | 44 | 44 | 0.767 | 0.073 | [3] |
| 1212              | North Carolina    | USA      | Afro-European | -         | -          | 18 | 18 | 18 | 0.768 | 0.080 | [3] |
| 1214              | Maasai (Mumonyot) | Kenya    | Africa        | 0.6       | 37         | 12 | 12 | 12 | 0.759 | 0.083 | [3] |
| 1215              | Maasai (Ilgwesi)  | Kenya    | Africa        | 0.3       | 36.8       | 21 | 21 | 21 | 0.758 | 0.082 | [3] |
| 1216              | Samburu           | Kenya    | Africa        | 1.5       | 37         | 18 | 18 | 18 | 0.763 | 0.082 | [3] |

|      |                   |                          |             |      |      |    |    |    |       |       |     |
|------|-------------------|--------------------------|-------------|------|------|----|----|----|-------|-------|-----|
| 1217 | Yaaku             | Kenya                    | Africa      | 0.5  | 37   | 19 | 19 | 19 | 0.750 | 0.082 | [3] |
| 1219 | Sambaa            | Tanzania                 | Africa      | -4.5 | 38.3 | 18 | 18 | 18 | 0.760 | 0.085 | [3] |
| 1220 | Dorobo            | Tanzania                 | Africa      | -5   | 37   | 10 | 10 | 10 | 0.759 | 0.097 | [3] |
| 1222 | Australian        | Australia                | Oceania     | -    | -    | 10 | 9  | 9  | 0.719 | 0.121 | [3] |
| 1223 | Beja (Hadandawa)  | Sudan                    | Middle East | 21   | 36   | 19 | 19 | 19 | 0.745 | 0.084 | [3] |
| 1224 | Tugen             | Kenya                    | Africa      | 0.8  | 35.8 | 22 | 22 | 22 | 0.757 | 0.077 | [3] |
| 1225 | Burji             | Ethiopia                 | Africa      | 5.5  | 37.8 | 24 | 24 | 24 | 0.763 | 0.076 | [3] |
| 1226 | Marakwet          | Kenya                    | Africa      | 1.3  | 35.5 | 14 | 14 | 14 | 0.754 | 0.094 | [3] |
| 1227 | Luhya             | Kenya                    | Africa      | 0.5  | 34.5 | 17 | 17 | 17 | 0.763 | 0.086 | [3] |
| 1228 | Luo               | Kenya                    | Africa      | -0.5 | 34.5 | 28 | 28 | 28 | 0.763 | 0.082 | [3] |
| 1229 | Kikuyu            | Kenya                    | Africa      | -1   | 37   | 21 | 21 | 21 | 0.764 | 0.080 | [3] |
| 1230 | Sengwer           | Kenya                    | Africa      | 1    | 35   | 21 | 21 | 21 | 0.754 | 0.079 | [3] |
| 1231 | Okiek             | Kenya                    | Africa      | 0.3  | 36   | 22 | 22 | 22 | 0.746 | 0.085 | [3] |
| 1232 | Wata              | Kenya                    | Africa      | 3.5  | 37   | 6  | 6  | 6  | 0.762 | 0.105 | [3] |
| 1233 | Nandi             | Kenya                    | Africa      | 0    | 35.5 | 11 | 11 | 11 | 0.761 | 0.094 | [3] |
| 1234 | El Molo           | Kenya                    | Africa      | 2.8  | 36.8 | 16 | 16 | 16 | 0.749 | 0.088 | [3] |
| 1235 | Gabra             | Kenya                    | Africa      | 3    | 37.5 | 16 | 16 | 16 | 0.755 | 0.083 | [3] |
| 1236 | Sabaot            | Kenya                    | Africa      | 1    | 34.8 | 20 | 20 | 20 | 0.762 | 0.079 | [3] |
| 1237 | Rendille          | Kenya                    | Africa      | 2.3  | 37.5 | 28 | 28 | 28 | 0.755 | 0.075 | [3] |
| 1238 | Turkana           | Kenya                    | Africa      | 3    | 36   | 26 | 26 | 26 | 0.760 | 0.081 | [3] |
| 1239 | Pokot             | Kenya                    | Africa      | 1.5  | 35.5 | 23 | 23 | 22 | 0.755 | 0.082 | [3] |
| 1240 | Borana            | Kenya                    | Africa      | 3    | 38   | 32 | 32 | 32 | 0.760 | 0.078 | [3] |
| 1241 | Maasai (Ilchamus) | Kenya                    | Africa      | 1.5  | 37.1 | 26 | 26 | 26 | 0.759 | 0.079 | [3] |
| 1242 | Konso             | Ethiopia                 | Africa      | 5.5  | 37.5 | 14 | 14 | 14 | 0.762 | 0.090 | [3] |
| 1243 | Laka              | Chad                     | Africa      | 8    | 16   | 33 | 33 | 33 | 0.760 | 0.084 | [3] |
| 1244 | Ngambaye          | Chad                     | Africa      | 9    | 16   | 30 | 30 | 30 | 0.758 | 0.082 | [3] |
| 1245 | Kaba              | Chad                     | Africa      | 8    | 16.8 | 27 | 27 | 27 | 0.760 | 0.080 | [3] |
| 1246 | Bulala            | Chad                     | Africa      | 13   | 18   | 15 | 15 | 15 | 0.754 | 0.089 | [3] |
| 1247 | Kanembou          | Chad                     | Africa      | 14   | 15   | 5  | 5  | 5  | 0.756 | 0.119 | [3] |
| 1248 | Mbum              | Central African Republic | Africa      | 5.5  | 13.5 | 13 | 13 | 13 | 0.755 | 0.099 | [3] |
| 1249 | Tutsi/Hutu        | Rwanda                   | Africa      | -2   | 30   | 8  | 8  | 8  | 0.764 | 0.097 | [3] |
| 1250 | Yakoma            | Central African Republic | Africa      | 4.3  | 22.3 | 6  | 6  | 6  | 0.759 | 0.121 | [3] |
| 1252 | Gbaya             | Central African Republic | Africa      | 5    | 15   | 15 | 15 | 15 | 0.760 | 0.085 | [3] |
| 1253 | Fulani (Mbororo)  | Cameroon                 | Africa      | 11.8 | 14.8 | 13 | 13 | 13 | 0.737 | 0.093 | [3] |
| 1254 | Wimbum            | Cameroon                 | Africa      | 6.5  | 10.8 | 14 | 14 | 14 | 0.756 | 0.095 | [3] |
| 1255 | Batie             | Cameroon                 | Africa      | 4.3  | 11   | 16 | 16 | 16 | 0.760 | 0.093 | [3] |

|      |                     |                           |               |       |      |    |    |    |       |       |     |
|------|---------------------|---------------------------|---------------|-------|------|----|----|----|-------|-------|-----|
| 1256 | Hausa (Cameroon)    | Cameroon                  | Africa        | 10.5  | 14.5 | 27 | 27 | 27 | 0.760 | 0.083 | [3] |
| 1257 | Kongo               | Democratic Republic Congo | Africa        | -5.5  | 15   | 17 | 17 | 17 | 0.759 | 0.088 | [3] |
| 1258 | Barega              | Democratic Republic Congo | Africa        | -3.5  | 28   | 4  | 4  | 4  | 0.763 | 0.135 | [3] |
| 1259 | Baluba              | Democratic Republic Congo | Africa        | -9    | 25   | 5  | 5  | 5  | 0.757 | 0.130 | [3] |
| 1262 | Dioula              | Ivory Coast               | Africa        | 9.5   | -4.5 | 5  | 5  | 5  | 0.756 | 0.119 | [3] |
| 1266 | Ewondo              | Cameroon                  | Africa        | 3.8   | 11.5 | 3  | 3  | 3  | 0.760 | 0.163 | [3] |
| 1267 | Eton                | Cameroon                  | Africa        | 4.3   | 11.5 | 4  | 4  | 4  | 0.764 | 0.130 | [3] |
| 1268 | Nuer                | Sudan                     | Africa        | 8.5   | 31   | 17 | 17 | 17 | 0.750 | 0.087 | [3] |
| 1269 | Shilook             | Sudan                     | Africa        | 10    | 32   | 15 | 15 | 15 | 0.751 | 0.094 | [3] |
| 1270 | Nyimang             | Sudan                     | Africa        | 12.3  | 29.5 | 12 | 12 | 12 | 0.750 | 0.095 | [3] |
| 1271 | Sara (various)      | Chad                      | Africa        | 8     | 17.5 | 26 | 26 | 26 | 0.759 | 0.084 | [3] |
| 1272 | Cape Mixed Ancestry | South Africa (Cape Town)  | Afro-European | -34   | 18.5 | 33 | 33 | 33 | 0.767 | 0.074 | [3] |
| 1273 | Venda               | South Africa              | Africa        | -22.5 | 30   | 11 | 11 | 11 | 0.752 | 0.096 | [3] |
| 1274 | !Xun/Kxoe           | South Africa              | Africa        | -30   | 18   | 6  | 6  | 6  | 0.757 | 0.129 | [3] |
| 1275 | Xhosa               | South Africa              | Africa        | -32   | 28   | 27 | 27 | 27 | 0.762 | 0.086 | [3] |
| 1276 | Koma                | Nigeria                   | Africa        | 8.5   | 12.7 | 9  | 9  | 9  | 0.743 | 0.113 | [3] |
| 1277 | Beta Israel         | Ethiopia                  | Africa        | 12    | 38   | 17 | 17 | 17 | 0.753 | 0.081 | [3] |
| 1278 | Dogon               | Mali                      | Africa        | 14    | -3   | 3  | 3  | 3  | 0.371 | 0.305 | [3] |
| 1280 | Temani              | Yemen                     | Middle East   | 15    | 45   | 18 | 18 | 18 | 0.724 | 0.093 | [3] |
| 1281 | Fulani (Nigeria)    | Nigeria                   | Africa        | 11    | 11   | 4  | 4  | 4  | 0.757 | 0.138 | [3] |

<sup>a</sup>Referred to as 'Colombian' in Rosenberg *et al.* [6], Rosenberg *et al.* [5], and Ramachandran *et al.* [4].

<sup>b</sup>The geographic coordinates of the city where sampling took place are provided.

<sup>c</sup>This population includes the Gujarati individuals studied by Pemberton *et al.* [11].

<sup>d</sup>This population includes the individuals from the HGDP-CEPH Papuan population.

<sup>e</sup>This population includes the individuals from the HGDP-CEPH Melanesian population.

**Table S21** The 248 individuals in MS5795 but not in MS5547

| Population |             |                       | Population |               |                       |
|------------|-------------|-----------------------|------------|---------------|-----------------------|
| ID         | Name        | Identification number | ID         | Name          | Identification number |
| 20         | Orcadian    | 801                   | 87         | Pima          | 1049                  |
| 25         | French      | 532                   | 87         | Pima          | 1052                  |
| 34         | Mozabite    | 1281                  | 87         | Pima          | 1054                  |
| 36         | Bedouin     | 633                   | 87         | Pima          | 1061                  |
| 37         | Druze       | 592                   | 441        | Bantu (Kenya) | 1413                  |
| 37         | Druze       | 603                   | 465        | Yoruba        | 921                   |
| 37         | Druze       | 605                   | 465        | Yoruba        | 922                   |
| 38         | Palestinian | 695                   | 465        | Yoruba        | 923                   |
| 50         | Balochi     | 84                    | 488        | Biaka Pygmy   | 451                   |
| 54         | Hazara      | 113                   | 488        | Biaka Pygmy   | 477                   |
| 56         | Kalash      | 292                   | 488        | Biaka Pygmy   | 1088                  |
| 59         | Sindhi      | 203                   | 488        | Biaka Pygmy   | 1089                  |
| 81         | Piapoco     | 705                   | 488        | Biaka Pygmy   | 1093                  |
| 81         | Piapoco     | 707                   | 489        | Mbuti Pygmy   | 468                   |
| 81         | Piapoco     | 709                   | 489        | Mbuti Pygmy   | 983                   |
| 81         | Piapoco     | 792                   | 494        | San           | 988                   |
| 81         | Piapoco     | 793                   | 504        | Gujarati      | 4250001               |
| 81         | Piapoco     | 827                   | 504        | Gujarati      | 46500080              |
| 82         | Karitiana   | 996                   | 504        | Gujarati      | 48900024              |
| 82         | Karitiana   | 997                   | 504        | Gujarati      | 48900027              |
| 82         | Karitiana   | 1000                  | 504        | Gujarati      | 425000471             |
| 82         | Karitiana   | 1004                  | 504        | Gujarati      | 425000474             |
| 82         | Karitiana   | 1005                  | 504        | Gujarati      | 425000475             |
| 82         | Karitiana   | 1007                  | 504        | Gujarati      | 425000476             |
| 82         | Karitiana   | 1008                  | 504        | Gujarati      | 425000477             |
| 82         | Karitiana   | 1011                  | 504        | Gujarati      | 425000478             |
| 82         | Karitiana   | 1016                  | 504        | Gujarati      | 425000480             |
| 82         | Karitiana   | 1017                  | 504        | Gujarati      | 425000481             |
| 83         | Surui       | 830                   | 504        | Gujarati      | 425000482             |
| 83         | Surui       | 834                   | 504        | Gujarati      | 425000485             |
| 83         | Surui       | 835                   | 504        | Gujarati      | 425000489             |
| 83         | Surui       | 839                   | 504        | Gujarati      | 425000501             |
| 83         | Surui       | 840                   | 504        | Gujarati      | 425000502             |
| 83         | Surui       | 841                   | 504        | Gujarati      | 506000139             |
| 83         | Surui       | 842                   | 611        | Lahu          | 1324                  |
| 83         | Surui       | 844                   | 611        | Lahu          | 1325                  |
| 83         | Surui       | 847                   | 613        | Oroqen        | 1210                  |
| 83         | Surui       | 848                   | 625        | Naxi          | 1343                  |
| 83         | Surui       | 850                   | 677        | Cambodian     | 718                   |
| 83         | Surui       | 851                   | 811        | Chipewyan     | 2395                  |
| 86         | Maya        | 866                   | 811        | Chipewyan     | 2399                  |
| 86         | Maya        | 867                   | 811        | Chipewyan     | 2400                  |
| 86         | Maya        | 878                   | 811        | Chipewyan     | 2560                  |
| 87         | Pima        | 1038                  | 812        | Cree          | 2418                  |
| 87         | Pima        | 1039                  | 813        | Ojibwa        | 2421                  |
| 87         | Pima        | 1040                  | 813        | Ojibwa        | 2430                  |
| 87         | Pima        | 1042                  | 813        | Ojibwa        | 2432                  |
| 87         | Pima        | 1045                  | 813        | Ojibwa        | 2440                  |
| 87         | Pima        | 1046                  | 821        | Kaqchikel     | 2690                  |

|      |                   |       |      |                    |       |
|------|-------------------|-------|------|--------------------|-------|
| 87   | Pima              | 1048  | 822  | Mixtec             | 2054  |
| 822  | Mixtec            | 2055  | 1007 | Mangseng           | 12034 |
| 832  | Cabecar           | 2034  | 1007 | Mangseng           | 12041 |
| 835  | Guarani           | 2726  | 1007 | Mangseng           | 12131 |
| 835  | Guarani           | 2729  | 1008 | Melamela           | 13111 |
| 836  | Ache              | 2746  | 1009 | Mengen             | 14021 |
| 841  | Kogi              | 2461  | 1009 | Mengen             | 14081 |
| 841  | Kogi              | 2462  | 1009 | Mengen             | 14111 |
| 841  | Kogi              | 2463  | 1010 | Sulka (Ganai)      | 20001 |
| 841  | Kogi              | 2464  | 1010 | Sulka (Ganai)      | 20161 |
| 841  | Kogi              | 2467  | 1010 | Sulka (Ganai)      | 20171 |
| 841  | Kogi              | 2473  | 1010 | Sulka (Ganai)      | 20201 |
| 841  | Kogi              | 2475  | 1010 | Sulka (Ganai)      | 20241 |
| 841  | Kogi              | 2476  | 1012 | Kol                | 8021  |
| 842  | Zenu              | 2485  | 1012 | Kol                | 8051  |
| 842  | Zenu              | 2487  | 1014 | Nakanai (Loso)     | 16001 |
| 843  | Inga              | 2518  | 1015 | Mamusi (Kisiluvi)  | 10161 |
| 844  | Wayuu             | 2525  | 1015 | Mamusi (Kisiluvi)  | 10241 |
| 844  | Wayuu             | 2539  | 1016 | Mamusi (Lingite)   | 11011 |
| 845  | Ticuna (Arara)    | 2543  | 1016 | Mamusi (Lingite)   | 11051 |
| 846  | Ticuna (Tarapaca) | 2764  | 1016 | Mamusi (Lingite)   | 11121 |
| 846  | Ticuna (Tarapaca) | 2767  | 1016 | Mamusi (Lingite)   | 11191 |
| 846  | Ticuna (Tarapaca) | 2768  | 1018 | Ata (Lugei)        | 6003  |
| 846  | Ticuna (Tarapaca) | 2793  | 1018 | Ata (Lugei)        | 6101  |
| 846  | Ticuna (Tarapaca) | 2795  | 1018 | Ata (Lugei)        | 6123  |
| 846  | Ticuna (Tarapaca) | 2797  | 1018 | Ata (Lugei)        | 6161  |
| 847  | Embera            | 2562  | 1018 | Ata (Lugei)        | 6181  |
| 847  | Embera            | 2564  | 1019 | Baining (Malasait) | 17051 |
| 847  | Embera            | 2566  | 1019 | Baining (Malasait) | 17081 |
| 847  | Embera            | 2569  | 1019 | Baining (Malasait) | 17211 |
| 848  | Wanana            | 2584  | 1020 | Baining (Marabu)   | 18001 |
| 848  | Wanana            | 2585  | 1020 | Baining (Marabu)   | 18021 |
| 848  | Wanana            | 2586  | 1020 | Baining (Marabu)   | 18131 |
| 848  | Wanana            | 2587  | 1020 | Baining (Marabu)   | 18171 |
| 848  | Wanana            | 2588  | 1020 | Baining (Marabu)   | 18191 |
| 848  | Wanana            | 2590  | 1020 | Baining (Marabu)   | 18221 |
| 848  | Wanana            | 2597  | 1020 | Baining (Marabu)   | 18241 |
| 848  | Wanana            | 2600  | 1021 | Baining (Rangulit) | 19071 |
| 849  | Arhuaco           | 2158  | 1021 | Baining (Rangulit) | 19081 |
| 849  | Arhuaco           | 2159  | 1021 | Baining (Rangulit) | 19101 |
| 849  | Arhuaco           | 2458  | 1022 | Tolai (Kabakada)   | 22191 |
| 849  | Arhuaco           | 2460  | 1024 | Mussau             | 27081 |
| 849  | Arhuaco           | 2576  | 1024 | Mussau             | 27181 |
| 849  | Arhuaco           | 2577  | 1024 | Mussau             | 27201 |
| 849  | Arhuaco           | 2579  | 1025 | Lavongai (North)   | 25001 |
| 883  | Paposo            | 2266  | 1025 | Lavongai (North)   | 25121 |
| 892  | Peque             | 2623  | 1025 | Lavongai (North)   | 25181 |
| 1001 | East Highlands    | 54071 | 1026 | Lavongai (North)   | 26141 |
| 1004 | Kove              | 9201  | 1026 | Lavongai (North)   | 26171 |
| 1005 | Anem (Keraiai)    | 4051  | 1026 | Lavongai (North)   | 26231 |
| 1005 | Anem (Keraiai)    | 4101  | 1028 | Nalik              | 31031 |
| 1006 | Anem (Purailing)  | 5041  | 1028 | Nalik              | 31071 |
| 1006 | Anem (Purailing)  | 5053  | 1028 | Nalik              | 31101 |
| 1006 | Anem (Purailing)  | 5151  | 1028 | Nalik              | 31144 |

|      |                 |       |      |            |       |
|------|-----------------|-------|------|------------|-------|
| 1007 | Mangseng        | 12021 | 1028 | Nalik      | 31161 |
| 1029 | Notsi           | 32061 | 1035 | Aita       | 36121 |
| 1029 | Notsi           | 32091 | 1035 | Aita       | 36151 |
| 1029 | Notsi           | 32171 | 1035 | Aita       | 36231 |
| 1029 | Notsi           | 32181 | 1037 | Nasioi     | 490   |
| 1030 | Kuot (Kabil)    | 28021 | 1037 | Nasioi     | 657   |
| 1030 | Kuot (Kabil)    | 28091 | 1037 | Nasioi     | 658   |
| 1030 | Kuot (Kabil)    | 28101 | 1037 | Nasioi     | 662   |
| 1031 | Kuot (Lamalaua) | 29001 | 1037 | Nasioi     | 663   |
| 1032 | Madak           | 30081 | 1037 | Nasioi     | 664   |
| 1032 | Madak           | 30161 | 1037 | Nasioi     | 789   |
| 1032 | Madak           | 30171 | 1037 | Nasioi     | 824   |
| 1032 | Madak           | 30221 | 1037 | Nasioi     | 825   |
| 1033 | Saposa          | 34021 | 1042 | Maoris     | 62171 |
| 1034 | Teop            | 35001 | 1042 | Maoris     | 62181 |
| 1034 | Teop            | 35201 | 1042 | Maoris     | 62221 |
| 1034 | Teop            | 35211 | 1043 | Ami        | 47191 |
| 1034 | Teop            | 35221 | 1043 | Ami        | 47221 |
| 1035 | Aita            | 36003 | 1044 | Taruko     | 42141 |
| 1035 | Aita            | 36011 | 1114 | Bedzan     | 71584 |
| 1035 | Aita            | 36031 | 1222 | Australian | 79195 |



**Table S22** The 112 individuals in MS5547 but not in MS5435

| Population |                   | Identification | Population |                    | Identification |
|------------|-------------------|----------------|------------|--------------------|----------------|
| ID         | Name              | number         | ID         | Name               | number         |
| 36         | Bedouin           | 617            | 903        | Tunisian Jewish    | 2345           |
| 37         | Druze             | 570            | 903        | Tunisian Jewish    | 2348           |
| 37         | Druze             | 585            | 1001       | East Highlands     | 54011          |
| 38         | Palestinian       | 681            | 1004       | Kove               | 9091           |
| 38         | Palestinian       | 728            | 1004       | Kove               | 9111           |
| 38         | Palestinian       | 742            | 1004       | Kove               | 9133           |
| 38         | Palestinian       | 743            | 1004       | Kove               | 9151           |
| 54         | Hazara            | 128            | 1005       | Anem (Keraiai)     | 4071           |
| 56         | Kalash            | 321            | 1005       | Anem (Keraiai)     | 4091           |
| 83         | Surui             | 833            | 1005       | Anem (Keraiai)     | 4141           |
| 86         | Maya              | 874            | 1007       | Mangseng           | 12071          |
| 464        | Mandenka          | 916            | 1008       | Melamela           | 13001          |
| 464        | Mandenka          | 919            | 1008       | Melamela           | 13091          |
| 488        | Biaka Pygmy       | 448            | 1008       | Melamela           | 13131          |
| 488        | Biaka Pygmy       | 1084           | 1008       | Melamela           | 13141          |
| 488        | Biaka Pygmy       | 1085           | 1011       | Sulka (Watwat)     | 21031          |
| 488        | Biaka Pygmy       | 1091           | 1012       | Kol                | 8081           |
| 504        | Gujarati          | 42600087       | 1012       | Kol                | 8171           |
| 504        | Gujarati          | 50200040       | 1013       | Nakanai (Bileki)   | 15063          |
| 504        | Gujarati          | 51300078       | 1013       | Nakanai (Bileki)   | 15121          |
| 504        | Gujarati          | 404000112      | 1013       | Nakanai (Bileki)   | 15151          |
| 504        | Gujarati          | 503000106      | 1013       | Nakanai (Bileki)   | 15204          |
| 811        | Chipewyan         | 2156           | 1014       | Nakanai (Loso)     | 16023          |
| 811        | Chipewyan         | 2383           | 1015       | Mamusi (Kisiluvi)  | 10121          |
| 811        | Chipewyan         | 2387           | 1017       | Ata (Uasilau)      | 7181           |
| 811        | Chipewyan         | 2390           | 1018       | Ata (Lugei)        | 6081           |
| 811        | Chipewyan         | 2393           | 1019       | Baining (Malasait) | 17201          |
| 811        | Chipewyan         | 2515           | 1021       | Baining (Rangulit) | 19001          |
| 811        | Chipewyan         | 2800           | 1022       | Tolai (Kabakada)   | 22051          |
| 813        | Ojibwa            | 2428           | 1023       | Tolai (Vunairoto)  | 23131          |
| 813        | Ojibwa            | 2436           | 1023       | Tolai (Vunairoto)  | 23143          |
| 813        | Ojibwa            | 2437           | 1026       | Lavongai (South)   | 26091          |
| 813        | Ojibwa            | 2438           | 1026       | Lavongai (South)   | 26211          |
| 831        | Guaymi            | 2002           | 1027       | Tigak              | 33081          |
| 831        | Guaymi            | 2014           | 1028       | Nalik              | 31211          |
| 832        | Cabecar           | 2026           | 1030       | Kuot (Kabil)       | 28081          |
| 832        | Cabecar           | 2037           | 1030       | Kuot (Kabil)       | 28171          |
| 836        | Ache              | 2747           | 1031       | Kuot (Lamalaua)    | 29131          |
| 836        | Ache              | 2748           | 1032       | Madak              | 30072          |
| 841        | Kogi              | 2466           | 1032       | Madak              | 30104          |
| 842        | Zenu              | 2494           | 1032       | Madak              | 30111          |
| 842        | Zenu              | 2496           | 1033       | Saposa             | 34011          |
| 842        | Zenu              | 2499           | 1033       | Saposa             | 34151          |
| 843        | Inga              | 2505           | 1033       | Saposa             | 34171          |
| 846        | Ticuna (Tarapaca) | 2761           | 1033       | Saposa             | 34231          |
| 846        | Ticuna (Tarapaca) | 2792           | 1034       | Teop               | 35043          |
| 848        | Waunana           | 2599           | 1035       | Aita               | 36091          |
| 882        | Quetalmahue       | 2288           | 1035       | Aita               | 36211          |
| 883        | Paposo            | 2267           | 1037       | Nasioi             | 823            |

|      |        |       |      |               |       |
|------|--------|-------|------|---------------|-------|
| 885  | Salta  | 2180  | 1037 | Nasioi        | 978   |
| 1044 | Taruko | 42151 | 1110 | Pare          | 70446 |
| 1101 | Hadza  | 70027 | 1114 | Bedzan        | 71578 |
| 1101 | Hadza  | 70047 | 1127 | Bamoun        | 71054 |
| 1101 | Hadza  | 70048 | 1132 | Podokwo       | 73033 |
| 1101 | Hadza  | 71474 | 1200 | Tikar (South) | 71731 |
| 1103 | Iraqw  | 70204 | 1239 | Pokot         | 72636 |

---

**Table S23** Six chimpanzee populations present in the chimpanzee data set together with their sample sizes and average heterozygosities in the combined human-chimpanzee data set

| Population |            | Reported category in<br>Becquet <i>et al.</i> | Sample size |        |        | Unbiased heterozygosity |                | Source |
|------------|------------|-----------------------------------------------|-------------|--------|--------|-------------------------|----------------|--------|
| ID         | Species    |                                               | MS5879      | MS5631 | MS5519 | Mean                    | SD across loci |        |
| 1          | Chimpanzee | Central                                       | 16          | 16     | 16     | 0.738                   | 0.212          | [12]   |
| 2          | Chimpanzee | Eastern                                       | 7           | 7      | 7      | 0.698                   | 0.229          | [12]   |
| 3          | Chimpanzee | Western                                       | 41          | 41     | 41     | 0.627                   | 0.239          | [12]   |
| 4          | Chimpanzee | Unreported                                    | 11          | 11     | 11     | 0.644                   | 0.245          | [12]   |
| 5          | Chimpanzee | Hybrid                                        | 3           | 3      | 3      | 0.746                   | 0.238          | [12]   |
| 6          | Bonobo     | Bonobo                                        | 6           | 6      | 6      | 0.656                   | 0.271          | [12]   |

Population IDs are the same as those used in Becquet *et al.* [12].

**Table S24** Three individuals with >27.5% missing data in the combined human-chimpanzee data set

| Population |                |                    | Identification number<br>of individual | Fraction of loci with<br>missing genotypes |
|------------|----------------|--------------------|----------------------------------------|--------------------------------------------|
| ID         | Name           | Data set of origin |                                        |                                            |
| 1270       | Nyimang        | African            | 103351                                 | 0.382                                      |
| 886        | Tucuman        | Latino             | 2194                                   | 0.317                                      |
| 1014       | Nakanai (Loso) | Pacific Islander   | 16024                                  | 0.297                                      |

**Table S25** 27 loci from the combined human data set of 645 loci with no genotype data in at least one population

| <b>ID in combined data set</b> | <b>Populations with no genotype data</b>                                       |
|--------------------------------|--------------------------------------------------------------------------------|
| GATA35_11                      | Cape Mixed Ancestry, Venda, !Xun/Kxoe, Xhosa, Koma, Beta Israel, Dogon, Temani |
| GATA11B08P_6                   | Koma, Beta Israel, Dogon, Temani                                               |
| TCTA017M_9                     | Koma, Beta Israel, Dogon, Temani                                               |
| AGAT139P_20                    | Koma, Beta Israel, Dogon, Temani                                               |
| TTTA063P_1                     | Dogon, Fulani (Nigeria)                                                        |
| TTAT027P_15                    | Nuer, Shilook                                                                  |
| D1S1653                        | Dogon                                                                          |
| GATA51H01_1                    | Dogon                                                                          |
| AGAT117_2                      | Dogon                                                                          |
| D3S3045                        | Dogon                                                                          |
| GATA138B05_5                   | Australian                                                                     |
| GATA142H05P_5                  | Fulani (Nigeria)                                                               |
| D6S1027                        | Dogon                                                                          |
| GATA61G06_7                    | Dogon                                                                          |
| AGAT049P_7                     | Nuer                                                                           |
| GATA65D11_9                    | Fulani (Nigeria)                                                               |
| D10S1208                       | Ewondo                                                                         |
| ATA20B07_10                    | Dogon                                                                          |
| ATA44G07M_10                   | Dogon                                                                          |
| D11S4459                       | Nuer                                                                           |
| AGAT110P_13                    | Shilook                                                                        |
| GATA137B09_13                  | Fulani (Nigeria)                                                               |
| ATA70B03P_14                   | Nuer                                                                           |
| D16S753                        | Dogon                                                                          |
| D17S1294                       | Dogon                                                                          |
| D18S858                        | Dogon                                                                          |
| D19S1034                       | !Xun\Kxoe                                                                      |

**Table S26** 10 loci from the combined human-chimpanzee data set of 246 loci with no genotype data in at least one population

| <b>ID in combined data set</b> | <b>Populations with no genotype data</b> |
|--------------------------------|------------------------------------------|
| TCTA017M_9                     | Koma, Beta Israel, Dogon, Temani         |
| D1S1653                        | Dogon                                    |
| GATA138B05_5                   | Australian                               |
| D6S1027                        | Dogon                                    |
| GATA61G06_7                    | Dogon                                    |
| D11S4459                       | Nuer                                     |
| D12S1042                       | Bonobo                                   |
| ATA70B03P_14                   | Nuer                                     |
| D17S1294                       | Dogon                                    |
| D18S858                        | Dogon                                    |

## References

1. Rosenberg N. A., 2006 Standardized subsets of the HGDP-CEPH Human Genome Diversity Cell Line Panel, accounting for atypical and duplicated samples and pairs of close relatives. *Ann. Hum. Genet.* 70: 841-847.
2. Friedlaender J. S., F. R. Friedlaender, F. A. Reed, K. K. Kidd, J. R. Kidd, G. K. Chambers, R. A. Lea, J. H. Loo, G. Koki, J. A. Hodgson, *et al.*, 2008 The genetic structure of Pacific Islanders. *PLoS Genet.* 4: e19.
3. Tishkoff S. A., F. A. Reed, F. R. Friedlaender, C. Ehret, A. Ranciaro, A. Froment, J. B. Hirbo, A. A. Awomoyi, J. M. Bodo, O. Doumbo, *et al.*, 2009 The genetic structure and history of Africans and African Americans. *Science* 324: 1035-1044.
4. Ramachandran S., O. Deshpande, C. C. Roseman, N. A. Rosenberg, M. W. Feldman, and L. L. Cavalli-Sforza, 2005 Support from the relationship of genetic and geographic distance in human populations for a serial founder effect originating in Africa. *Proc. Natl. Acad. Sci. U S A* 102: 15942-15947.
5. Rosenberg N. A., S. Mahajan, S. Ramachandran, C. Zhao, J. K. Pritchard, and M. W. Feldman, 2005 Clines, clusters, and the effect of study design on the inference of human population structure. *PLoS Genet.* 1: e70.
6. Rosenberg N. A., J. K. Pritchard, J. L. Weber, H. M. Cann, K. K. Kidd, L. A. Zhivotovsky, and M. W. Feldman, 2002 Genetic structure of human populations. *Science* 298: 2381-2385.
7. Wang S., C. M. Lewis, M. Jakobsson, S. Ramachandran, N. Ray, G. Bedoya, W. Rojas, M. V. Parra, J. A. Molina, C. Gallo, *et al.*, 2007 Genetic variation and population structure in Native Americans. *PLoS Genet.* 3: e185.
8. Wang S., N. Ray, W. Rojas, M. V. Parra, G. Bedoya, C. Gallo, G. Poletti, G. Mazzotti, K. Hill, A. M. Hurtado, *et al.*, 2008 Geographic patterns of genome admixture in Latin American Mestizos. *PLoS Genet.* 4: e1000037.
9. Kopelman N. M., L. Stone, C. Wang, D. Gefel, M. W. Feldman, J. Hillel, and N. A. Rosenberg, 2009 Genomic microsatellites identify shared Jewish ancestry intermediate between Middle Eastern and European populations. *BMC Genet.* 10: 80.
10. Rosenberg N. A., S. Mahajan, C. Gonzalez-Quevedo, M. G. Blum, L. Nino-Rosales, V. Ninis, P. Das, M. Hegde, L. Molinari, G. Zapata, *et al.*, 2006 Low levels of genetic divergence across geographically and linguistically diverse populations from India. *PLoS Genet.* 2: e215.
11. Pemberton T. J., F-Y. Li, E. K. Hanson, N. U. Mehta, S. Choi, J. Ballantyne, J. W. Belmont, N. A. Rosenberg, C. Tyler-Smith, and P. I. Patel, 2012 Impact of restricted marital practices on genetic variation in an endogamous Gujarati group. *Am. J. Phys. Anthropol.* 149: 92-103.
12. Becquet C., N. Patterson, A. C. Stone, M. Przeworski, and D. Reich, 2007 Genetic structure of chimpanzee populations. *PLoS Genet.* 3: e66.
