# Supplementary material for: Population Structure in a Comprehensive Genomic Data Set on Human Microsatellite Variation
Source: Oxford University Press journal article supplement (doi:10.1534/g3.113.005728), 2013-03-28
Supplement: 005728_figures1.pdf [file 005728_figures1.pdf]

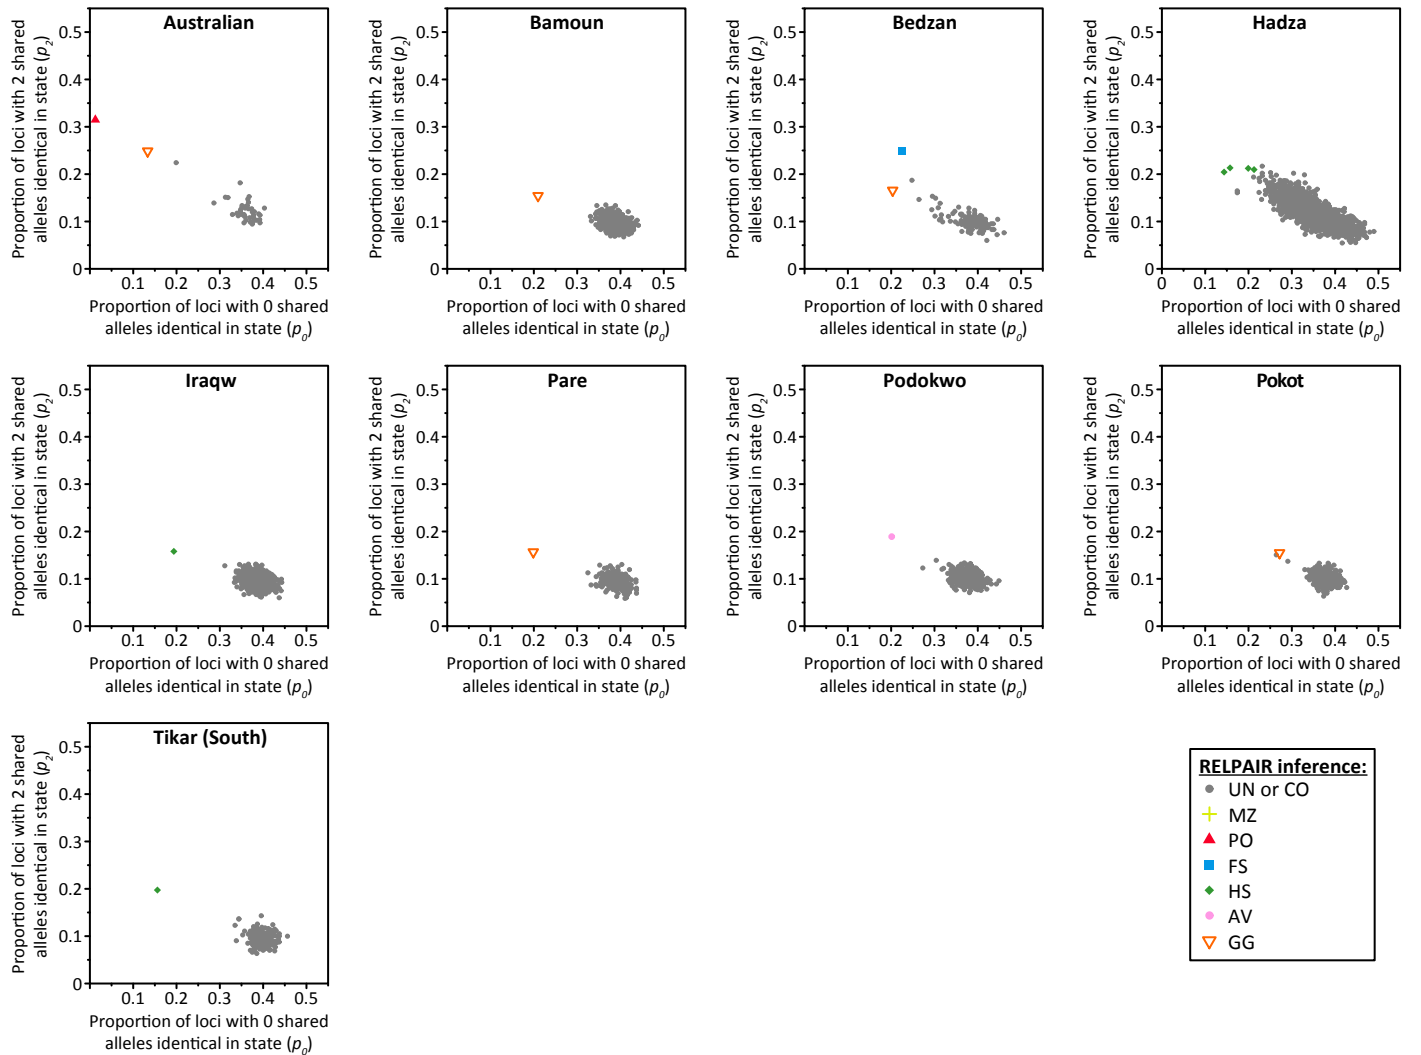

**Figure S1** Intra-population allele-sharing for pairs of individuals in those populations in the African data set for which we inferred at least one relative pair. First- and second-degree intra-population relative pairs are reported in Tables S5 and S6, respectively.
