# Supplementary material for: Population Structure in a Comprehensive Genomic Data Set on Human Microsatellite Variation
Source: Oxford University Press journal article supplement (doi:10.1534/g3.113.005728), 2013-03-28
Supplement: 005728_figures2.pdf [file 005728_figures2.pdf]

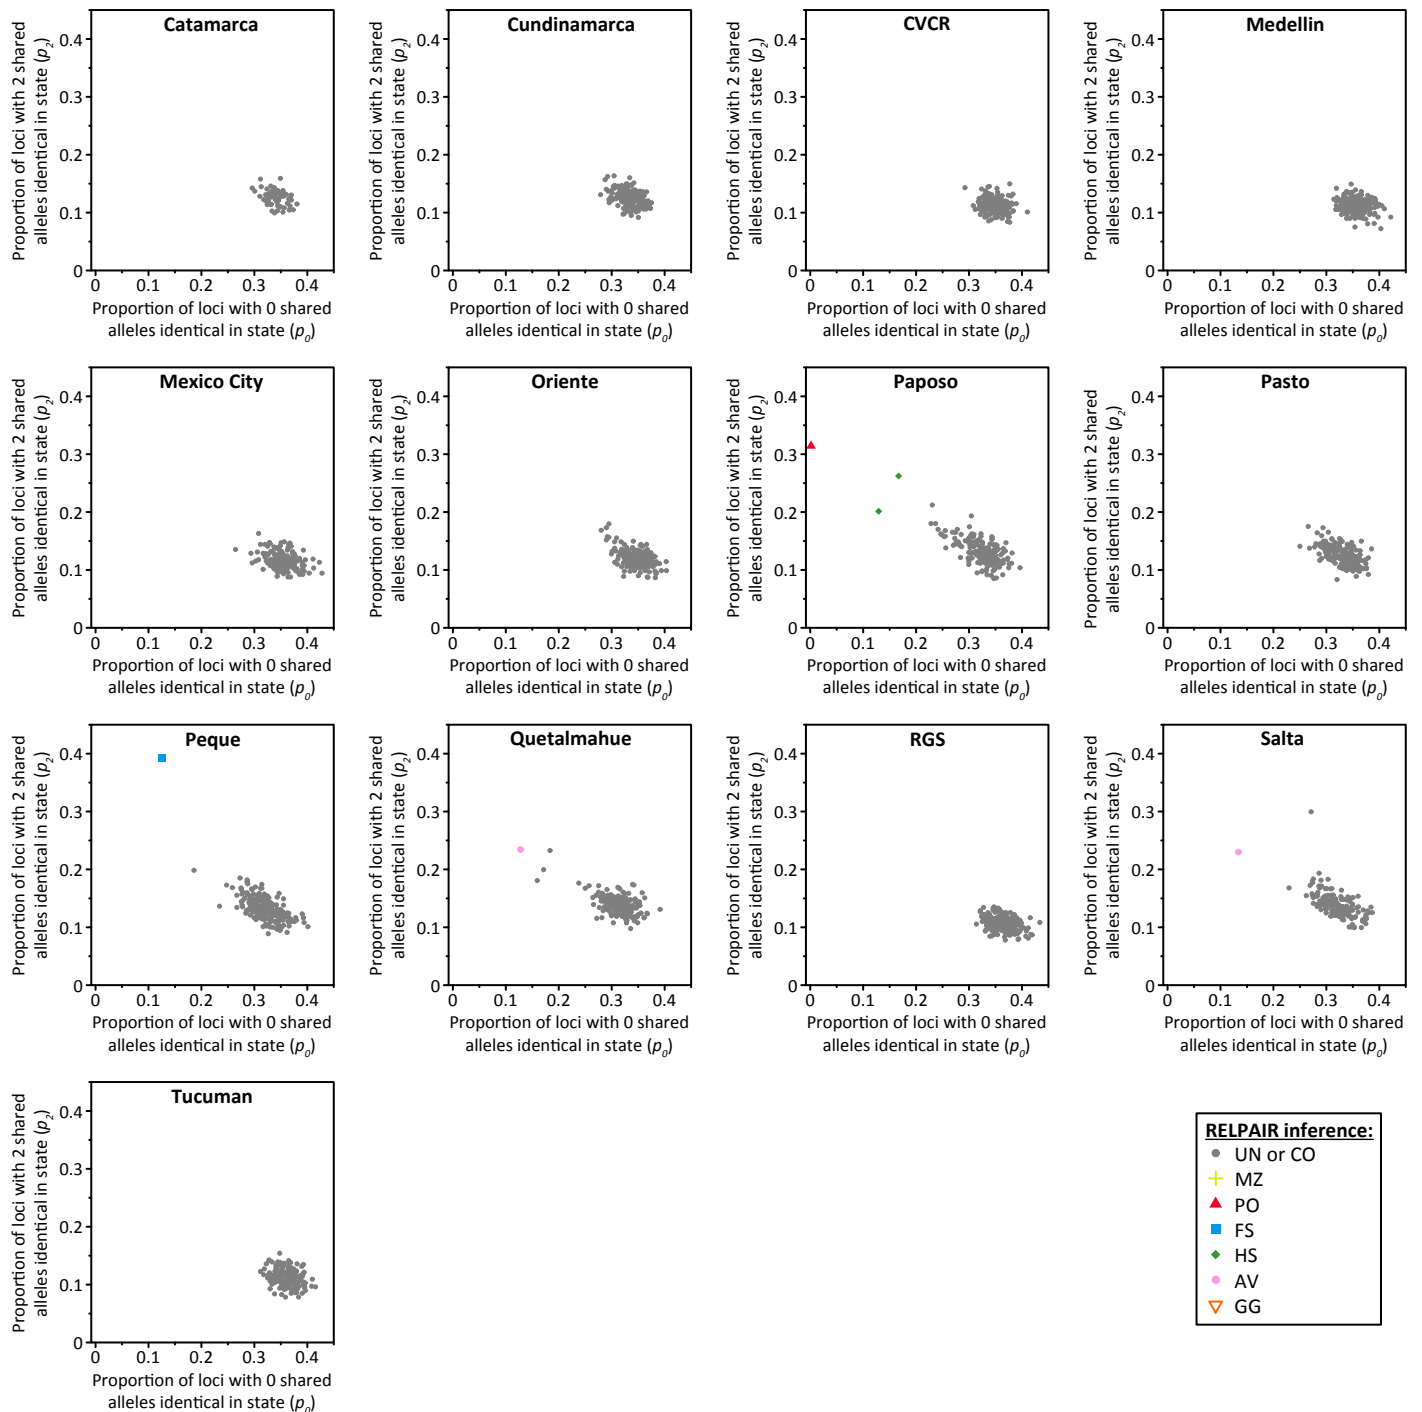

**Figure S2** Intra-population allele-sharing for pairs of individuals in the Latino data set. First- and second-degree relative pairs are reported in Tables S7 and S8, respectively.
