# Supplementary material for: Population Structure in a Comprehensive Genomic Data Set on Human Microsatellite Variation
Source: Oxford University Press journal article supplement (doi:10.1534/g3.113.005728), 2013-03-28
Supplement: 005728_figures4.pdf [file 005728_figures4.pdf]

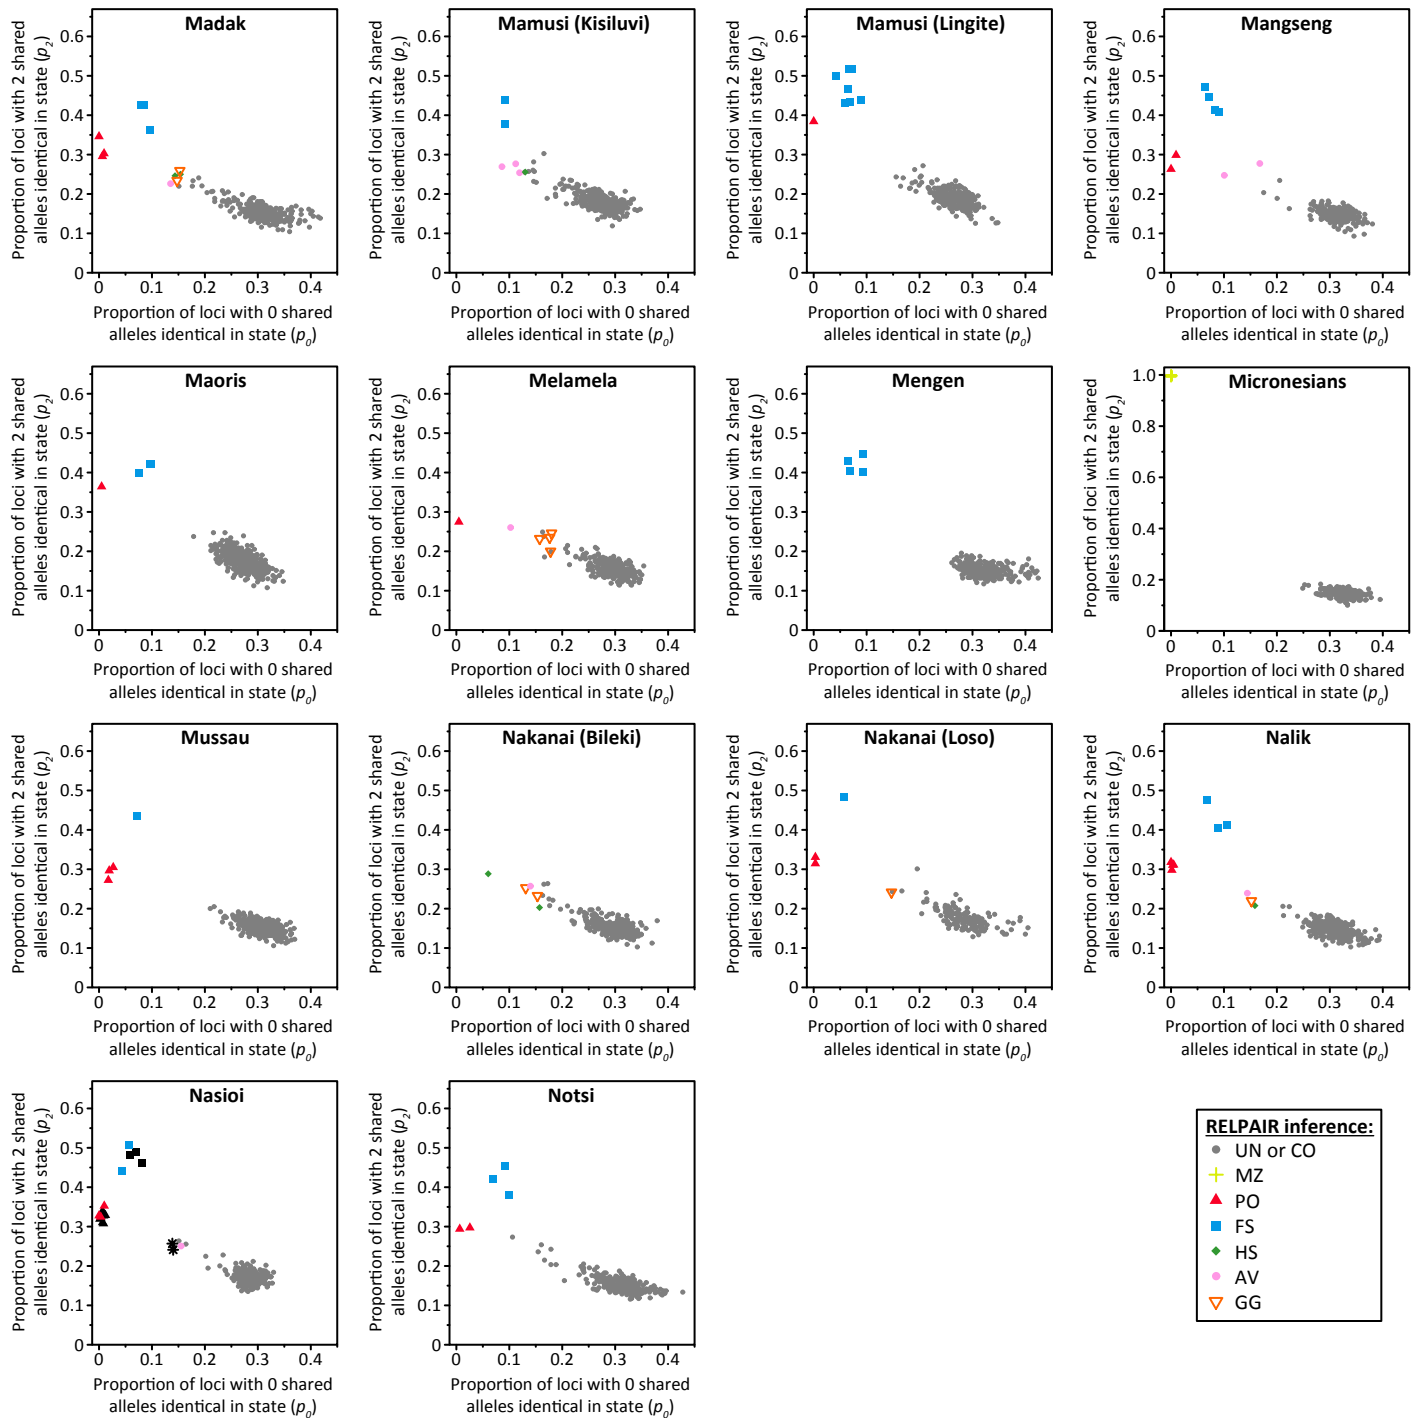

**Figure S4** Intra-population allele-sharing for pairs of individuals in the Pacific Islander data set (part 2). Symbols colored black in the Nasioi population are relative pairs identified in Rosenberg [1]. Monozygotic, first-degree, and second-degree relative pairs are reported in Tables S9, S10, and S11, respectively.
