# Supplementary material for: Population Structure in a Comprehensive Genomic Data Set on Human Microsatellite Variation
Source: Oxford University Press journal article supplement (doi:10.1534/g3.113.005728), 2013-03-28
Supplement: 005728_tables1.pdf [file 005728_tables1.pdf]

**Table S1** Allele size adjustments used to make the Pacific Islander data set comparable to the combined HGDP-CEPH, Native American, Latino, Jewish, Asian Indian, and CGP data set

| ID in combined data set | ID in Pacific Islander data set | Amount added to genotypes in the Pacific Islander data set (c*) |
|-------------------------|---------------------------------|-----------------------------------------------------------------|
| AAT107_16               | AAT107Z                         | -53                                                             |
| AAT200_1                | AAT200ZP                        | -137                                                            |
| AATA019_8               | AATA019ZP                       | -131                                                            |
| ATA50C05_6              | ATA50C05ZP                      | 116                                                             |
| ATA70B03P_14            | ATA70B03ZP                      | -124                                                            |
| ATA77F05_14             | ATA77F05Z                       | 74                                                              |
| D10S1221                | ATA21A03Z                       | 73                                                              |
| D10S1412                | ATA31G11P                       | -7                                                              |
| D10S1430                | GATA84C01ZP                     | -39                                                             |
| D11S1304                | UT2095M                         | -1                                                              |
| D11S1392                | GATA6B09P                       | -7                                                              |
| D11S1984                | GGAA17G05P                      | -7                                                              |
| D11S1998                | GATA23E06L                      | -3                                                              |
| D11S1999                | GATA23F06L                      | -3                                                              |
| D11S2000                | GATA28D01M                      | -1                                                              |
| D12S1042                | ATA27A06P                       | -7                                                              |
| D12S1045                | ATA29A06P                       | -7                                                              |
| D12S1052                | GATA26D02M                      | -1                                                              |
| D12S1064                | GATA63D12P                      | -7                                                              |
| D12S1300                | GATA85A04M                      | -1                                                              |
| D12S1301                | GATA91H06M                      | -1                                                              |
| D12S2070                | ATA25F09M                       | -1                                                              |
| D13S1807                | GATA11C08P                      | -7                                                              |
| D13S787                 | GATA23C03P                      | -7                                                              |
| D13S796 <sup>a</sup>    | GATA51B02ZP                     | -46                                                             |
| D13S895                 | GGAA22G01ZP                     | 17                                                              |
| D14S608                 | GATA43H01M                      | -1                                                              |
| D14S617                 | GGAA21G11L                      | -2                                                              |
| D15S1515                | GATA197B10P                     | -7                                                              |
| D15S816                 | GATA73F01M                      | -1                                                              |
| D16S2624                | GATA81D12M                      | -1                                                              |
| D16S3253                | GATA22F09P                      | -7                                                              |
| D17S1298                | GAAT2C03P                       | -7                                                              |
| D17S2180                | ATC6A06M                        | -1                                                              |
| D17S2195                | ATA58A02P                       | -7                                                              |
| D18S1376 <sup>b</sup>   | GATA185C06Z                     | -17                                                             |
| D19S589                 | GATA29B01L                      | 1                                                               |
| D19S591                 | GATA44F10P                      | -7                                                              |
| D1S1596                 | GATA26G09P                      | -7                                                              |
| D1S1612                 | GGAA3A07M                       | -1                                                              |
| D1S1627                 | ATA25E07M                       | -1                                                              |
| D1S1728                 | GATA109Z                        | -130                                                            |
| D1S3669                 | GATA29A05P                      | -7                                                              |
| D20S477                 | GATA29F06Z                      | -1                                                              |
| D21S1411                | UT1355Z                         | -3                                                              |

|                      |              |      |
|----------------------|--------------|------|
| D2S686               | GGAA10F06M   | -1   |
| D2S1352              | ATA27D04P    | -7   |
| D2S1363              | GATA23D03ZP  | -107 |
| D2S1384              | GATA52A04M   | -1   |
| D2S1391              | GATA65C03M   | -1   |
| D2S1394              | GATA69E12M   | -1   |
| D2S1400              | GGAA20G10M   | -1   |
| D2S2944              | GATA30E06P   | -7   |
| D2S2968              | GATA178G09M  | -1   |
| D3S1744 <sup>c</sup> | GATA3C02ZP   | -26  |
| D3S1768              | GATA8B05M    | -1   |
| D3S2427              | GATA22F11NZ  | 58   |
| D3S2432              | GATA27C08P   | -7   |
| D3S4529              | GATA128C02M  | -1   |
| D4S1627              | GATA7D01ZP   | 37   |
| D4S1652              | GATA5B02M    | -1   |
| D4S2366              | GATA22G05M   | -1   |
| D4S2397              | ATA27C07P    | -7   |
| D4S2417              | GATA42H02P   | -8   |
| D4S2623              | GATA62A12Z   | -35  |
| D4S2632              | GATA72G09Z   | 25   |
| D5S1456              | GATA11A11P   | -7   |
| D5S1462              | GATA3H06M    | -1   |
| D5S1470              | GATA7C06M    | -1   |
| D5S1480              | ATA23A10M    | -1   |
| D5S1725 <sup>d</sup> | GATA89G08Z   | 31   |
| D5S2488              | ATA20G07M    | -1   |
| D6S1017              | GGAT3H10M    | -1   |
| D6S1027              | ATA22G07P    | -7   |
| D6S2436              | GATA165G02M  | -1   |
| D7S1802              | GATA41G07M   | -1   |
| D7S1818              | GATA24D12P   | -7   |
| D7S2204              | GATA73D10L   | 4    |
| D7S2477              | 035XB9ZP     | -70  |
| D7S3056              | GATA24F03ZP  | 7    |
| D7S3070              | GATA189C06M  | -1   |
| D8S1048              | UT7129L      | 1    |
| D8S1110              | GATA8G10M    | -1   |
| D8S1132              | GATA26E03M   | -1   |
| D8S1477 <sup>e</sup> | GGAA20C10Z   | -104 |
| D8S373               | UT721M       | -1   |
| D8S592               | GATA6B02P    | -7   |
| D9S1120              | GATA81C04M   | -1   |
| D9S2169              | GATA62F03M   | -1   |
| D9S910               | ATA18A07M    | -1   |
| GATA138B05_5         | GATA138B05ZP | 49   |
| GATA169E06_14        | GATA169E06ZP | 38   |
| GATA66D01_2          | GATA66D01ZP  | -110 |
| GGAA30H04_14         | GGAA30H04ZP  | -103 |
| NA.D18S.1            | GATA178F11Z  | 67   |

|          |             |    |
|----------|-------------|----|
| NA.D1S.3 | GATA133A08Q | -4 |
| TPO.D2S  | SRAP        | -7 |

---

<sup>a</sup>Friedlaender *et al.* [2] used an adjustment of -45 nt.

<sup>b</sup>This locus was not present in the list of adjusted loci reported by Friedlaender *et al.* [2].

<sup>c</sup>Friedlaender *et al.* [2] used an adjustment of -25 nt.

<sup>d</sup>Friedlaender *et al.* [2] used an adjustment of 27 nt.

<sup>e</sup>Friedlaender *et al.* [2] used an adjustment of -103 nt.
