# Supplementary material for: Population Structure in a Comprehensive Genomic Data Set on Human Microsatellite Variation
Source: Oxford University Press journal article supplement (doi:10.1534/g3.113.005728), 2013-03-28
Supplement: 005728_tables2.pdf [file 005728_tables2.pdf]

**Table S2** Allele size adjustments used to make the African data set comparable to the combined HGDP-CEPH, Native American, Latino, Jewish, Asian Indian, CGP, and Pacific Islander data set

| ID in combined data set | ID in African data set | Amount added to genotypes in the African data set (c*) |
|-------------------------|------------------------|--------------------------------------------------------|
| D10S1412                | ATA31G11P              | -7                                                     |
| D11S1304                | UT2095M                | -1                                                     |
| D11S1392                | GATA6B09P              | -7                                                     |
| D11S1984                | GGAA17G05P             | -7                                                     |
| D11S1998                | GATA23E06L             | -3                                                     |
| D11S1999                | GATA23F06L             | -3                                                     |
| D11S2000                | GATA28D01M             | -1                                                     |
| D12S1042                | ATA27A06P              | -7                                                     |
| D12S1045                | ATA29A06P              | -7                                                     |
| D12S1052                | GATA26D02M             | -1                                                     |
| D12S1064                | GATA63D12P             | -7                                                     |
| D12S1300                | GATA85A04M             | -1                                                     |
| D12S1301                | GATA91H06M             | -1                                                     |
| D12S2070                | ATA25F09M              | -1                                                     |
| D13S1807                | GATA11C08P             | -7                                                     |
| D13S787                 | GATA23C03P             | -7                                                     |
| D13S796                 | GATA51B02M             | -1                                                     |
| D14S608                 | GATA43H01M             | -1                                                     |
| D14S617                 | GGAA21G11L             | -2                                                     |
| D15S1515                | GATA197B10P            | -7                                                     |
| D15S816                 | GATA73F01M             | -1                                                     |
| D16S2624                | GATA81D12M             | -1                                                     |
| D16S3253                | GATA22F09P             | -7                                                     |
| D17S1298                | GAAT2C03P              | -7                                                     |
| D17S2180                | ATC6A06M               | -1                                                     |
| D17S2195                | ATA58A02P              | -7                                                     |
| D18S1376 <sup>a</sup>   | GATA185C06Z            | -17                                                    |
| D19S589                 | GATA29B01L             | 1                                                      |
| D19S591                 | GATA44F10P             | -7                                                     |
| D1S1596                 | GATA26G09P             | -7                                                     |
| D1S1612                 | GGAA3A07M              | -1                                                     |
| D1S1627                 | ATA25E07M              | -1                                                     |
| D1S3669                 | GATA29A05P             | -7                                                     |
| D20S477                 | GATA29F06Z             | -1                                                     |
| D22S686                 | GGAA10F06M             | -1                                                     |
| D2S1352                 | ATA27D04P              | -7                                                     |
| D2S1384                 | GATA52A04M             | -1                                                     |
| D2S1391                 | GATA65C03M             | -1                                                     |
| D2S1394                 | GATA69E12M             | -1                                                     |
| D2S1400                 | GGAA20G10M             | -1                                                     |
| D2S2944                 | GATA30E06P             | -7                                                     |
| D2S2968                 | GATA178G09M            | -1                                                     |
| D3S1744                 | GATA3C02M              | -1                                                     |
| D3S1768                 | GATA8B05M              | -1                                                     |
| D3S2427                 | GATA22F11NZ            | 58                                                     |

|                      |             |    |
|----------------------|-------------|----|
| D3S2432              | GATA27C08P  | -7 |
| D3S4529              | GATA128C02M | -1 |
| D4S1627              | GATA7D01ZP  | 37 |
| D4S1652              | GATA5B02M   | -1 |
| D4S2366              | GATA22G05M  | -1 |
| D4S2397              | ATA27C07P   | -7 |
| D4S2417              | GATA42H02P  | -8 |
| D5S1456              | GATA11A11P  | -7 |
| D5S1462              | GATA3H06M   | -1 |
| D5S1470              | GATA7C06M   | -1 |
| D5S1480              | ATA23A10M   | -1 |
| D5S1725 <sup>b</sup> | GATA89G08Z  | 31 |
| D5S2488              | ATA20G07M   | -1 |
| D6S1017              | GGAT3H10M   | -1 |
| D6S1027              | ATA22G07P   | -7 |
| D6S2436              | GATA165G02M | -1 |
| D7S1802              | GATA41G07M  | -1 |
| D7S1818              | GATA24D12P  | -7 |
| D7S2204              | GATA73D10L  | 4  |
| D7S3070              | GATA189C06M | -1 |
| D8S1048              | UT7129L     | 1  |
| D8S1110              | GATA8G10M   | -1 |
| D8S1132              | GATA26E03M  | -1 |
| D8S1477              | GGAA20C10M  | -1 |
| D8S373               | UT721M      | -1 |
| D8S592               | GATA6B02P   | -7 |
| D9S1120              | GATA81C04M  | -1 |
| D9S2169              | GATA62F03M  | -1 |
| D9S910               | ATA18A07M   | -1 |
| NA.D18S.1            | GATA178F11Z | 67 |
| NA.D1S.3             | GATA133A08Q | -4 |
| TPO.D2S              | SRAP        | -7 |

<sup>a</sup>This locus was not present in the list of adjusted loci reported by Tishkoff *et al.* [3].

<sup>b</sup>Tishkoff *et al.* [3] used an adjustment of 27 nt.
