# Supplementary material for: Population Structure in a Comprehensive Genomic Data Set on Human Microsatellite Variation
Source: Oxford University Press journal article supplement (doi:10.1534/g3.113.005728), 2013-03-28
Supplement: 005728_tables5.pdf [file 005728_tables5.pdf]

**Table S5** Two previously unreported intra-population first-degree relative pairs in the African data set

| Population |            | Identification number |                      | RELPAIR inference:<br>parent/offspring (PO)<br>or full-sibling (FS) | Support for inference:<br>RELPAIR (R) or<br>allele-sharing (A) |
|------------|------------|-----------------------|----------------------|---------------------------------------------------------------------|----------------------------------------------------------------|
| ID         | Name       | First<br>individual   | Second<br>individual |                                                                     |                                                                |
| 1222       | Australian | 79193                 | 79195                | PO                                                                  | R,A                                                            |
| 1114       | Bedzan     | 71580                 | 71584                | FS                                                                  | R <sup>†</sup>                                                 |

<sup>†</sup> Allele-sharing suggests this pair is a second-degree relative pair (Figure S1). However, in the RELPAIR analysis, the likelihood ratio statistic for all other relative types was <0.0001 for this pair. To be conservative, this pair was treated as a first-degree relative pair when creating the standardized subsets MS5547 and MS5435.
