# Supplementary material for: Population Structure in a Comprehensive Genomic Data Set on Human Microsatellite Variation
Source: Oxford University Press journal article supplement (doi:10.1534/g3.113.005728), 2013-03-28
Supplement: 005728_tables7.pdf [file 005728_tables7.pdf]

**Table S7** Two previously unreported intra-population first-degree relative pairs in the Latino data set

| Population |        | Identification number |                      | RELPAIR inference:<br>parent/offspring (PO)<br>or full-sibling (FS) | Support for inference:<br>RELPAIR (R) or<br>allele-sharing (A) |
|------------|--------|-----------------------|----------------------|---------------------------------------------------------------------|----------------------------------------------------------------|
| ID         | Name   | First<br>individual   | Second<br>individual |                                                                     |                                                                |
| 883        | Paposo | 2264                  | 2266                 | PO                                                                  | R,A                                                            |
| 892        | Peque  | 2623                  | 2639                 | FS                                                                  | R,A                                                            |
