# Supplementary material for: Population Structure in a Comprehensive Genomic Data Set on Human Microsatellite Variation
Source: Oxford University Press journal article supplement (doi:10.1534/g3.113.005728), 2013-03-28
Supplement: 005728_tables9.pdf [file 005728_tables9.pdf]

**Table S9** Six previously unreported intra-population monozygotic pairs in the Pacific Islander data set

| Population |              | Identification number |                   | Support for inference:<br>RELPAIR (R) or<br>allele-sharing (A) |
|------------|--------------|-----------------------|-------------------|----------------------------------------------------------------|
| ID         | Name         | First individual      | Second individual |                                                                |
| 1040       | Micronesians | 53071                 | 53141             | R,A                                                            |
| 1040       | Micronesians | 53081                 | 53151             | R,A                                                            |
| 1040       | Micronesians | 53091                 | 53161             | R,A                                                            |
| 1040       | Micronesians | 53101                 | 53181             | R,A                                                            |
| 1040       | Micronesians | 53111                 | 53191             | R,A                                                            |
| 1040       | Micronesians | 53131                 | 53061             | R,A                                                            |
