# Supplementary material for: Population Structure in a Comprehensive Genomic Data Set on Human Microsatellite Variation
Source: Oxford University Press journal article supplement (doi:10.1534/g3.113.005728), 2013-03-28
Supplement: 005728_tables10.pdf [file 005728_tables10.pdf]

**Table S10** 127 previously unreported intra-population first-degree relative pairs in the Pacific Islander data set

| ID   | Population                     | Identification number |                   | RELPAIR inference:<br>parent/offspring (PO)<br>or full-sibling (FS) | Support for inference:<br>RELPAIR (R) or<br>allele-sharing (A) |
|------|--------------------------------|-----------------------|-------------------|---------------------------------------------------------------------|----------------------------------------------------------------|
|      | Name                           | First individual      | Second individual |                                                                     |                                                                |
| 1001 | East Highlands (Gimi & Goroka) | 54071                 | 54061             | PO                                                                  | R,A                                                            |
| 1001 | East Highlands (Gimi & Goroka) | 54091                 | 54071             | PO                                                                  | R,A                                                            |
| 1005 | Anem (Keraiai)                 | 4051                  | 4091              | PO                                                                  | R,A                                                            |
| 1005 | Anem (Keraiai)                 | 4061                  | 4051              | PO                                                                  | R,A                                                            |
| 1005 | Anem (Keraiai)                 | 4141                  | 4021              | PO                                                                  | R,A                                                            |
| 1006 | Anem (Purailing)               | 5041                  | 5061              | PO                                                                  | R,A                                                            |
| 1006 | Anem (Purailing)               | 5053                  | 5061              | PO                                                                  | R,A                                                            |
| 1007 | Mangseng                       | 12021                 | 12111             | PO                                                                  | R,A                                                            |
| 1007 | Mangseng                       | 12041                 | 12091             | PO                                                                  | R,A                                                            |
| 1008 | Melamela                       | 13071                 | 13111             | PO                                                                  | R,A                                                            |
| 1010 | Sulka (Ganai)                  | 20171                 | 20193             | PO                                                                  | R,A                                                            |
| 1010 | Sulka (Ganai)                  | 20171                 | 20201             | PO                                                                  | R,A                                                            |
| 1012 | Kol                            | 8021                  | 8071              | PO                                                                  | R,A                                                            |
| 1012 | Kol                            | 8113                  | 8051              | PO                                                                  | R,A                                                            |
| 1014 | Nakanai (Loso)                 | 16001                 | 16041             | PO                                                                  | R,A                                                            |
| 1014 | Nakanai (Loso)                 | 16131                 | 16061             | PO                                                                  | R,A                                                            |
| 1016 | Mamusi (Lingite)               | 11121                 | 11101             | PO                                                                  | R,A                                                            |
| 1018 | Ata (Lugei)                    | 6013                  | 6123              | PO                                                                  | R,A                                                            |
| 1018 | Ata (Lugei)                    | 6161                  | 6231              | PO                                                                  | R,A                                                            |
| 1020 | Baining (Marabu)               | 18191                 | 18111             | PO                                                                  | R,A                                                            |
| 1020 | Baining (Marabu)               | 18221                 | 18153             | PO                                                                  | R,A                                                            |
| 1020 | Baining (Marabu)               | 18241                 | 18021             | PO                                                                  | R,A                                                            |
| 1020 | Baining (Marabu)               | 18241                 | 18041             | PO                                                                  | R,A                                                            |
| 1023 | Tolai (Vunairoto)              | 23212                 | 23214             | PO                                                                  | R,A                                                            |
| 1023 | Tolai (Vunairoto)              | 23213                 | 23212             | PO                                                                  | R,A                                                            |
| 1024 | Mussau                         | 27041                 | 27201             | PO                                                                  | R,A                                                            |
| 1024 | Mussau                         | 27201                 | 27101             | PO                                                                  | R,A                                                            |
| 1024 | Mussau                         | 27221                 | 27181             | PO                                                                  | R,A                                                            |
| 1025 | Lavongai (North)               | 25033                 | 25001             | PO                                                                  | R,A                                                            |
| 1025 | Lavongai (North)               | 25041                 | 25181             | PO                                                                  | R,A                                                            |
| 1025 | Lavongai (North)               | 25051                 | 25121             | PO                                                                  | R,A                                                            |
| 1026 | Lavongai (South)               | 26141                 | 26154             | PO                                                                  | R,A                                                            |
| 1026 | Lavongai (South)               | 26141                 | 26171             | PO                                                                  | R,A                                                            |
| 1026 | Lavongai (South)               | 26231                 | 26201             | PO                                                                  | R,A                                                            |
| 1028 | Nalik                          | 31071                 | 31101             | PO                                                                  | R,A                                                            |
| 1028 | Nalik                          | 31071                 | 31111             | PO                                                                  | R,A                                                            |
| 1028 | Nalik                          | 31161                 | 31173             | PO                                                                  | R,A                                                            |
| 1028 | Nalik                          | 31161                 | 31193             | PO                                                                  | R,A                                                            |
| 1029 | Notsi                          | 32131                 | 32171             | PO                                                                  | R,A                                                            |
| 1029 | Notsi                          | 32143                 | 32181             | PO                                                                  | R,A                                                            |
| 1030 | Kuot (Kabil)                   | 28101                 | 28211             | PO                                                                  | R,A                                                            |
| 1032 | Madak                          | 30021                 | 30081             | PO                                                                  | R,A                                                            |
| 1032 | Madak                          | 30053                 | 30221             | PO                                                                  | R,A                                                            |
| 1032 | Madak                          | 30211                 | 30161             | PO                                                                  | R,A                                                            |
| 1034 | Teop                           | 35061                 | 35221             | PO                                                                  | R,A                                                            |

|      |                    |       |       |    |     |
|------|--------------------|-------|-------|----|-----|
| 1034 | Teop               | 35071 | 35001 | PO | R,A |
| 1034 | Teop               | 35181 | 35211 | PO | R,A |
| 1034 | Teop               | 35201 | 35221 | PO | R,A |
| 1035 | Aita               | 36061 | 36121 | PO | R,A |
| 1035 | Aita               | 36073 | 36003 | PO | R,A |
| 1035 | Aita               | 36073 | 36011 | PO | R,A |
| 1037 | Nasioi             | 663   | 52004 | PO | R,A |
| 1037 | Nasioi             | 52004 | 662   | PO | R,A |
| 1037 | Nasioi             | 52041 | 658   | PO | R,A |
| 1042 | Maoris             | 62161 | 62181 | PO | R,A |
| 1044 | Taruko             | 42161 | 42141 | PO | R,A |
| 1004 | Kove               | 9201  | 9241  | FS | R,A |
| 1005 | Anem (Keraiai)     | 4101  | 4013  | FS | R,A |
| 1006 | Anem (Purailing)   | 5053  | 5041  | FS | R,A |
| 1006 | Anem (Purailing)   | 5071  | 5151  | FS | R,A |
| 1006 | Anem (Purailing)   | 5181  | 5101  | FS | R,A |
| 1007 | Mangseng           | 12021 | 12034 | FS | R,A |
| 1007 | Mangseng           | 12033 | 12021 | FS | R,A |
| 1007 | Mangseng           | 12033 | 12034 | FS | R,A |
| 1007 | Mangseng           | 12131 | 12101 | FS | R,A |
| 1009 | Mengen             | 14001 | 14021 | FS | R,A |
| 1009 | Mengen             | 14081 | 14071 | FS | R,A |
| 1009 | Mengen             | 14111 | 14071 | FS | R,A |
| 1009 | Mengen             | 14111 | 14081 | FS | R,A |
| 1010 | Sulka (Ganai)      | 20013 | 20161 | FS | R,A |
| 1010 | Sulka (Ganai)      | 20031 | 20001 | FS | R,A |
| 1010 | Sulka (Ganai)      | 20201 | 20193 | FS | R,A |
| 1010 | Sulka (Ganai)      | 20241 | 20221 | FS | R,A |
| 1014 | Nakanai (Loso)     | 16051 | 16001 | FS | R,A |
| 1015 | Mamusi (Kisiluvi)  | 10091 | 10161 | FS | R,A |
| 1015 | Mamusi (Kisiluvi)  | 10241 | 10111 | FS | R,A |
| 1016 | Mamusi (Lingite)   | 11011 | 11141 | FS | R,A |
| 1016 | Mamusi (Lingite)   | 11031 | 11131 | FS | R,A |
| 1016 | Mamusi (Lingite)   | 11051 | 11011 | FS | R,A |
| 1016 | Mamusi (Lingite)   | 11051 | 11141 | FS | R,A |
| 1016 | Mamusi (Lingite)   | 11071 | 11031 | FS | R,A |
| 1016 | Mamusi (Lingite)   | 11071 | 11131 | FS | R,A |
| 1016 | Mamusi (Lingite)   | 11091 | 11191 | FS | R,A |
| 1018 | Ata (Lugei)        | 6003  | 6013  | FS | R,A |
| 1018 | Ata (Lugei)        | 6101  | 6071  | FS | R,A |
| 1018 | Ata (Lugei)        | 6181  | 6051  | FS | R,A |
| 1019 | Baining (Malasait) | 17011 | 17211 | FS | R,A |
| 1019 | Baining (Malasait) | 17051 | 17141 | FS | R,A |
| 1019 | Baining (Malasait) | 17091 | 17081 | FS | R,A |
| 1020 | Baining (Marabu)   | 18041 | 18021 | FS | R,A |
| 1020 | Baining (Marabu)   | 18171 | 18131 | FS | R,A |
| 1020 | Baining (Marabu)   | 18171 | 18201 | FS | R,A |
| 1020 | Baining (Marabu)   | 18201 | 18131 | FS | R,A |
| 1020 | Baining (Marabu)   | 18211 | 18001 | FS | R,A |
| 1021 | Baining (Rangulit) | 19011 | 19101 | FS | R,A |

|      |                    |       |       |    |                |
|------|--------------------|-------|-------|----|----------------|
| 1021 | Baining (Rangulit) | 19071 | 19201 | FS | R,A            |
| 1021 | Baining (Rangulit) | 19081 | 19151 | FS | R,A            |
| 1022 | Tolai (Kabakada)   | 22113 | 22091 | FS | R,A            |
| 1022 | Tolai (Kabakada)   | 22113 | 22121 | FS | R,A            |
| 1022 | Tolai (Kabakada)   | 22121 | 22091 | FS | R,A            |
| 1022 | Tolai (Kabakada)   | 22191 | 22211 | FS | R,A            |
| 1023 | Tolai (Vunairoto)  | 23213 | 23214 | FS | R,A            |
| 1024 | Mussau             | 27081 | 27031 | FS | R,A            |
| 1026 | Lavongai (South)   | 26171 | 26154 | FS | R,A            |
| 1028 | Nalik              | 31101 | 31111 | FS | R,A            |
| 1028 | Nalik              | 31134 | 31031 | FS | R,A            |
| 1028 | Nalik              | 31144 | 31121 | FS | R,A            |
| 1029 | Notsi              | 32061 | 32081 | FS | R,A            |
| 1029 | Notsi              | 32061 | 32091 | FS | R,A            |
| 1029 | Notsi              | 32091 | 32081 | FS | R,A            |
| 1030 | Kuot (Kabil)       | 28031 | 28021 | FS | R,A            |
| 1030 | Kuot (Kabil)       | 28091 | 28073 | FS | R,A            |
| 1031 | Kuot (Lamalaua)    | 29171 | 29001 | FS | R,A            |
| 1032 | Madak              | 30061 | 30171 | FS | R,A            |
| 1032 | Madak              | 30061 | 30221 | FS | R,A            |
| 1032 | Madak              | 30221 | 30171 | FS | R,A            |
| 1033 | Saposa             | 34021 | 34121 | FS | R,A            |
| 1035 | Aita               | 36021 | 36151 | FS | R,A            |
| 1035 | Aita               | 36031 | 36081 | FS | R,A            |
| 1035 | Aita               | 36221 | 36231 | FS | R,A            |
| 1037 | Nasioi             | 52004 | 490   | FS | R,A            |
| 1037 | Nasioi             | 52041 | 664   | FS | R,A            |
| 1042 | Maoris             | 62011 | 62171 | FS | R,A            |
| 1042 | Maoris             | 62221 | 62011 | FS | R,A            |
| 1042 | Maoris             | 62221 | 62171 | FS | R,A            |
| 1043 | Ami                | 47181 | 47221 | FS | R <sup>†</sup> |
| 1043 | Ami                | 47211 | 47191 | FS | R,A            |

<sup>†</sup>Allele-sharing suggests this pair is a second-degree relative pair (Figure S3). In the RELPAIR analysis, the likelihood ratio statistic for HS was the next highest after FS for this pair. To be conservative, this pair was treated as a first-degree relative pair when creating the standardized subsets MS5547 and MS5435.
