# Supplementary material for: Population Structure in a Comprehensive Genomic Data Set on Human Microsatellite Variation
Source: Oxford University Press journal article supplement (doi:10.1534/g3.113.005728), 2013-03-28
Supplement: 005728_tables12.pdf [file 005728_tables12.pdf]

**Table S12** 13 previously unreported intra-population parent/parent/offspring trios in the Pacific Islander data set

| Population |                                | Identification number |          |           | Support for inference:<br>RELPAIR (R) or<br>allele-sharing (A) |
|------------|--------------------------------|-----------------------|----------|-----------|----------------------------------------------------------------|
| ID         | Name                           | Parent 1              | Parent 2 | Offspring |                                                                |
| 1001       | East Highlands (Gimi & Goroka) | 54061                 | 54091    | 54071     | R,A                                                            |
| 1005       | Anem (Keraiai)                 | 4061                  | 4091     | 4051      | R,A                                                            |
| 1006       | Anem (Purailing)               | 5041                  | 5053     | 5061      | R,A                                                            |
| 1010       | Sulka (Ganai)                  | 20193                 | 20201    | 20171     | R,A                                                            |
| 1020       | Baining (Marabu)               | 18021                 | 18041    | 18241     | R,A                                                            |
| 1023       | Tolai (Vunairoto)              | 23213                 | 23214    | 23212     | R,A                                                            |
| 1024       | Mussau                         | 27041                 | 27101    | 27201     | R,A                                                            |
| 1026       | Lavongai (South)               | 26154                 | 26171    | 26141     | R,A                                                            |
| 1028       | Nalik                          | 31101                 | 31111    | 31071     | R,A                                                            |
| 1028       | Nalik                          | 31173                 | 31193    | 31161     | R,A                                                            |
| 1034       | Teop                           | 35061                 | 35201    | 35221     | R,A                                                            |
| 1035       | Aita                           | 36003                 | 36011    | 36073     | R,A                                                            |
| 1037       | Nasioi                         | 662                   | 663      | 52004     | R,A                                                            |
