# Supplementary material for: Population Structure in a Comprehensive Genomic Data Set on Human Microsatellite Variation
Source: Oxford University Press journal article supplement (doi:10.1534/g3.113.005728), 2013-03-28
Supplement: 005728_tables16.pdf [file 005728_tables16.pdf]

**Table S16** 24 previously unreported inter-population first-degree relative pairs in the Pacific Islander data set

| First individual |                          |       | Second individual |                          |       | RELP AIR inference:<br>parent/offspring (PO)<br>or full-sibling (FS) | Support for inference:<br>RELP AIR (R) or<br>allele-sharing (A) |
|------------------|--------------------------|-------|-------------------|--------------------------|-------|----------------------------------------------------------------------|-----------------------------------------------------------------|
| Population       | Identification<br>number | ID    | Population        | Identification<br>number | ID    |                                                                      |                                                                 |
| 1003             | Sepik                    | 3091  | 1026              | Lavongai (North)         | 26163 | PO                                                                   | R,A                                                             |
| 1003             | Sepik                    | 3191  | 1029              | Madak                    | 32161 | PO                                                                   | R,A                                                             |
| 1003             | Sepik                    | 3171  | 1032              | Notsi                    | 30201 | PO                                                                   | R,A                                                             |
| 1005             | Anem (Keraiai)           | 4021  | 1006              | Anem (Purailing)         | 5021  | PO                                                                   | R,A                                                             |
| 1005             | Anem (Keraiai)           | 4081  | 1006              | Anem (Purailing)         | 5011  | PO                                                                   | R,A                                                             |
| 1005             | Anem (Keraiai)           | 4181  | 1006              | Anem (Purailing)         | 5111  | PO                                                                   | R,A                                                             |
| 1005             | Anem (Keraiai)           | 4201  | 1006              | Anem (Purailing)         | 5101  | PO                                                                   | R,A                                                             |
| 1005             | Anem (Keraiai)           | 4201  | 1006              | Anem (Purailing)         | 5181  | PO                                                                   | R,A                                                             |
| 1010             | Sulka (Ganai)            | 20101 | 1011              | Sulka (Watwat)           | 21081 | PO                                                                   | R,A                                                             |
| 1015             | Mamusi (Kisiluvi)        | 10103 | 1016              | Mamusi (Lingite)         | 11081 | PO                                                                   | R,A                                                             |
| 1022             | Tolai (Kabakada)         | 22131 | 1023              | Tolai (Vunairoto)        | 23212 | PO                                                                   | R,A                                                             |
| 1028             | Nalik                    | 31221 | 1029              | Notsi                    | 32021 | PO                                                                   | R,A                                                             |
| 1005             | Anem (Keraiai)           | 4114  | 1006              | Anem (Purailing)         | 5091  | FS                                                                   | R,A                                                             |
| 1010             | Sulka (Ganai)            | 20091 | 1011              | Sulka (Watwat)           | 21101 | FS                                                                   | R,A                                                             |
| 1014             | Nakanai (Loso)           | 16061 | 1018              | Ata (Lugei)              | 6211  | FS                                                                   | R,A                                                             |
| 1015             | Mamusi (Kisiluvi)        | 10051 | 1016              | Mamusi (Lingite)         | 11031 | FS                                                                   | R,A                                                             |
| 1015             | Mamusi (Kisiluvi)        | 10051 | 1016              | Mamusi (Lingite)         | 11071 | FS                                                                   | R,A                                                             |
| 1015             | Mamusi (Kisiluvi)        | 10051 | 1016              | Mamusi (Lingite)         | 11131 | FS                                                                   | R,A                                                             |
| 1015             | Mamusi (Kisiluvi)        | 10181 | 1016              | Mamusi (Lingite)         | 11221 | FS                                                                   | R <sup>†</sup>                                                  |
| 1022             | Tolai (Kabakada)         | 22091 | 1023              | Tolai (Vunairoto)        | 23152 | FS                                                                   | R,A                                                             |
| 1022             | Tolai (Kabakada)         | 22113 | 1023              | Tolai (Vunairoto)        | 23152 | FS                                                                   | R,A                                                             |
| 1022             | Tolai (Kabakada)         | 22121 | 1023              | Tolai (Vunairoto)        | 23152 | FS                                                                   | R,A                                                             |
| 1022             | Tolai (Kabakada)         | 22131 | 1023              | Tolai (Vunairoto)        | 23213 | FS                                                                   | R,A                                                             |
| 1022             | Tolai (Kabakada)         | 22131 | 1023              | Tolai (Vunairoto)        | 23214 | FS                                                                   | R,A                                                             |

<sup>†</sup> Allele-sharing suggests this pair is a second-degree relative pair (Figure S6). In the RELPAIR analysis, the likelihood ratio statistic for AV was the next highest after FS for this pair. To be conservative, this pair was treated as a first-degree relative pair when creating the MS5795 and MS5879 data sets.
