# Supplementary material for: Population Structure in a Comprehensive Genomic Data Set on Human Microsatellite Variation
Source: Oxford University Press journal article supplement (doi:10.1534/g3.113.005728), 2013-03-28
Supplement: 005728_tables17.pdf [file 005728_tables17.pdf]

**Table S17** 54 previously unreported inter-population second-degree relative pairs in the Pacific Islander data set

| First individual |                    |                          | Second individual |                    |                          | RELP AIR inference:<br>Avuncular (AV),<br>grandparental (GG),<br>or half-sibling (HS) | Support for inference:<br>RELP AIR (R) or<br>allele-sharing (A) |
|------------------|--------------------|--------------------------|-------------------|--------------------|--------------------------|---------------------------------------------------------------------------------------|-----------------------------------------------------------------|
| Population       |                    | Identification<br>number | Population        |                    | Identification<br>number |                                                                                       |                                                                 |
| ID               | Name               |                          | Name              |                    |                          |                                                                                       |                                                                 |
| 1005             | Anem (Keraiai)     | 4001                     | 1006              | Anem (Purailing)   | 5031                     | AV                                                                                    | R,A                                                             |
| 1005             | Anem (Keraiai)     | 4051                     | 1006              | Anem (Purailing)   | 5091                     | AV                                                                                    | R,A                                                             |
| 1005             | Anem (Keraiai)     | 4071                     | 1006              | Anem (Purailing)   | 5191                     | AV                                                                                    | R,A                                                             |
| 1005             | Anem (Keraiai)     | 4131                     | 1006              | Anem (Purailing)   | 5021                     | AV                                                                                    | R,A                                                             |
| 1005             | Anem (Keraiai)     | 4181                     | 1006              | Anem (Purailing)   | 5191                     | AV                                                                                    | R,A                                                             |
| 1005             | Anem (Keraiai)     | 4191                     | 1006              | Anem (Purailing)   | 5083                     | AV                                                                                    | R,A                                                             |
| 1005             | Anem (Keraiai)     | 4191                     | 1006              | Anem (Purailing)   | 5101                     | AV                                                                                    | R,A                                                             |
| 1007             | Mangseng           | 12011                    | 1013              | Nakanai (Bileki)   | 15001                    | AV                                                                                    | R,A                                                             |
| 1009             | Mengen             | 14201                    | 1012              | Kol                | 8261                     | AV                                                                                    | R,A                                                             |
| 1010             | Sulka (Ganai)      | 20041                    | 1011              | Sulka (Watwat)     | 21021                    | AV                                                                                    | R,A                                                             |
| 1010             | Sulka (Ganai)      | 20171                    | 1011              | Sulka (Watwat)     | 21021                    | AV                                                                                    | R,A                                                             |
| 1010             | Sulka (Ganai)      | 20131                    | 1027              | Tigak              | 33241                    | AV                                                                                    | R,A                                                             |
| 1014             | Nakanai (Loso)     | 16161                    | 1015              | Mamusi (Kisiluvi)  | 10091                    | AV                                                                                    | R,A                                                             |
| 1014             | Nakanai (Loso)     | 16161                    | 1015              | Mamusi (Kisiluvi)  | 10161                    | AV                                                                                    | R,A                                                             |
| 1014             | Nakanai (Loso)     | 16131                    | 1018              | Ata (Lugei)        | 6211                     | AV                                                                                    | R,A                                                             |
| 1015             | Mamusi (Kisiluvi)  | 10041                    | 1016              | Mamusi (Lingite)   | 11081                    | AV                                                                                    | R,A                                                             |
| 1015             | Mamusi (Kisiluvi)  | 10071                    | 1016              | Mamusi (Lingite)   | 11031                    | AV                                                                                    | R,A                                                             |
| 1015             | Mamusi (Kisiluvi)  | 10071                    | 1016              | Mamusi (Lingite)   | 11071                    | AV                                                                                    | R,A                                                             |
| 1015             | Mamusi (Kisiluvi)  | 10071                    | 1016              | Mamusi (Lingite)   | 11131                    | AV                                                                                    | R,A                                                             |
| 1015             | Mamusi (Kisiluvi)  | 10181                    | 1016              | Mamusi (Lingite)   | 11231                    | AV                                                                                    | R,A                                                             |
| 1015             | Mamusi (Kisiluvi)  | 10191                    | 1016              | Mamusi (Lingite)   | 11021                    | AV                                                                                    | R,A                                                             |
| 1015             | Mamusi (Kisiluvi)  | 10201                    | 1016              | Mamusi (Lingite)   | 11175                    | AV                                                                                    | R,A                                                             |
| 1015             | Mamusi (Kisiluvi)  | 10231                    | 1016              | Mamusi (Lingite)   | 11043                    | AV                                                                                    | R,A                                                             |
| 1018             | Ata (Lugei)        | 6201                     | 1026              | Lavongai (South)   | 26051                    | AV                                                                                    | R,A                                                             |
| 1019             | Baining (Malasait) | 17001                    | 1021              | Baining (Rangulit) | 19141                    | AV                                                                                    | R,A                                                             |
| 1019             | Baining (Malasait) | 17031                    | 1021              | Baining (Rangulit) | 19181                    | AV                                                                                    | R,A                                                             |
| 1019             | Baining (Malasait) | 17051                    | 1021              | Baining (Rangulit) | 19071                    | AV                                                                                    | R,A                                                             |
| 1019             | Baining (Malasait) | 17051                    | 1021              | Baining (Rangulit) | 19201                    | AV                                                                                    | R,A                                                             |
| 1019             | Baining (Malasait) | 17081                    | 1021              | Baining (Rangulit) | 19171                    | AV                                                                                    | R,A                                                             |
| 1019             | Baining (Malasait) | 17141                    | 1021              | Baining (Rangulit) | 19071                    | AV                                                                                    | R,A                                                             |

|      |                    |       |      |                    |       |    |     |
|------|--------------------|-------|------|--------------------|-------|----|-----|
| 1019 | Baining (Malasait) | 17141 | 1021 | Baining (Rangulit) | 19201 | AV | R,A |
| 1019 | Baining (Malasait) | 17151 | 1021 | Baining (Rangulit) | 19201 | AV | R,A |
| 1019 | Baining (Malasait) | 17211 | 1021 | Baining (Rangulit) | 19131 | AV | R,A |
| 1019 | Baining (Malasait) | 17221 | 1021 | Baining (Rangulit) | 19051 | AV | R,A |
| 1019 | Baining (Malasait) | 17221 | 1021 | Baining (Rangulit) | 19181 | AV | R,A |
| 1019 | Baining (Malasait) | 17241 | 1021 | Baining (Rangulit) | 19181 | AV | R,A |
| 1022 | Tolai (Kabakada)   | 22001 | 1023 | Tolai (Vunairoto)  | 23171 | AV | R,A |
| 1022 | Tolai (Kabakada)   | 22161 | 1023 | Tolai (Vunairoto)  | 23201 | AV | R,A |
| 1022 | Tolai (Kabakada)   | 22211 | 1023 | Tolai (Vunairoto)  | 23152 | AV | R,A |
| 1024 | Mussau             | 27051 | 1030 | Kuot (Kabil)       | 28201 | AV | R,A |
| 1027 | Tigak              | 33021 | 1029 | Notsi              | 32223 | AV | R,A |
| 1027 | Tigak              | 33051 | 1029 | Notsi              | 32231 | AV | R,A |
| 1028 | Nalik              | 31181 | 1029 | Notsi              | 32021 | AV | R,A |
| 1028 | Nalik              | 31121 | 1030 | Kuot (Kabil)       | 28151 | AV | R,A |
| 1028 | Nalik              | 31144 | 1030 | Kuot (Kabil)       | 28151 | AV | R,A |
| 1029 | Notsi              | 32211 | 1032 | Madak              | 30091 | AV | R,A |
| 1005 | Anem (Keraiai)     | 4161  | 1006 | Anem (Purailing)   | 5061  | GG | R,A |
| 1005 | Anem (Keraiai)     | 4181  | 1006 | Anem (Purailing)   | 5131  | GG | R,A |
| 1015 | Mamusi (Kisiluvi)  | 10173 | 1016 | Mamusi (Lingite)   | 11151 | GG | R,A |
| 1026 | Lavongai (South)   | 26081 | 1030 | Kuot (Kabil)       | 28031 | GG | R,A |
| 1005 | Anem (Keraiai)     | 4001  | 1006 | Anem (Purailing)   | 5141  | HS | R,A |
| 1005 | Anem (Keraiai)     | 4191  | 1006 | Anem (Purailing)   | 5181  | HS | R,A |
| 1022 | Tolai (Kabakada)   | 22191 | 1023 | Tolai (Vunairoto)  | 23152 | HS | R,A |
| 1026 | Lavongai (South)   | 26081 | 1030 | Kuot (Kabil)       | 28021 | HS | R,A |
