# Supplementary material for: Population Structure in a Comprehensive Genomic Data Set on Human Microsatellite Variation
Source: Oxford University Press journal article supplement (doi:10.1534/g3.113.005728), 2013-03-28
Supplement: 005728_tables18.pdf [file 005728_tables18.pdf]

**Table S18** Three previously unreported inter-population parent/parent/offspring trios in the Pacific Islander data set

| Parent 1   |                  |                          | Parent 2   |                   |                          | Offspring  |                   |                          | Support for inference:<br>RELPAIR (R) or<br>allele-sharing (A) |
|------------|------------------|--------------------------|------------|-------------------|--------------------------|------------|-------------------|--------------------------|----------------------------------------------------------------|
| Population |                  | Identification<br>number | Population |                   | Identification<br>number | Population |                   | Identification<br>number |                                                                |
| ID         | Name             |                          | ID         | Name              |                          | ID         | Name              |                          |                                                                |
| 1005       | Anem (Keraiai)   | 4141                     | 1006       | Anem (Purailing)  | 5021                     | 1005       | Anem (Keraiai)    | 4021                     | R,A                                                            |
| 1006       | Anem (Purailing) | 5101                     | 1006       | Anem (Purailing)  | 5181                     | 1005       | Anem (Keraiai)    | 4201                     | R,A                                                            |
| 1022       | Tolai (Kabakada) | 22131                    | 1023       | Tolai (Vunairoto) | 23213                    | 1023       | Tolai (Vunairoto) | 23212                    | R,A                                                            |
