# Supplementary material for: Population Structure in a Comprehensive Genomic Data Set on Human Microsatellite Variation
Source: Oxford University Press journal article supplement (doi:10.1534/g3.113.005728), 2013-03-28
Supplement: 005728_tables19.pdf [file 005728_tables19.pdf]

**Table S19** 10 previously unreported inter-population second-degree relative pairs in the Native American data set

| First individual |                |                          | Second individual |                   |                          | RELPAIR inference:<br>Avuncular (AV),<br>grandparental (GG),<br>or half-sibling (HS) | Support for inference:<br>RELPAIR (R) or<br>allele-sharing (A) |
|------------------|----------------|--------------------------|-------------------|-------------------|--------------------------|--------------------------------------------------------------------------------------|----------------------------------------------------------------|
| Population       |                | Identification<br>number | Population        |                   | Identification<br>number |                                                                                      |                                                                |
| ID               | Name           |                          | ID                | Name              |                          |                                                                                      |                                                                |
| 841              | Kogi           | 2463                     | 849               | Arhuaco           | 2157                     | AV                                                                                   | R,A                                                            |
| 841              | Kogi           | 2463                     | 849               | Arhuaco           | 2158                     | AV                                                                                   | R,A                                                            |
| 841              | Kogi           | 2463                     | 849               | Arhuaco           | 2159                     | AV                                                                                   | R,A                                                            |
| 841              | Kogi           | 2463                     | 849               | Arhuaco           | 2160                     | AV                                                                                   | R,A                                                            |
| 841              | Kogi           | 2463                     | 849               | Arhuaco           | 2419                     | AV                                                                                   | R,A                                                            |
| 841              | Kogi           | 2463                     | 849               | Arhuaco           | 2420                     | AV                                                                                   | R,A                                                            |
| 841              | Kogi           | 2463                     | 849               | Arhuaco           | 2578                     | AV                                                                                   | R,A                                                            |
| 841              | Kogi           | 2463                     | 849               | Arhuaco           | 2732                     | AV                                                                                   | R,A                                                            |
| 845              | Ticuna (Arara) | 2543                     | 846               | Ticuna (Tarapaca) | 2794                     | AV                                                                                   | R,A                                                            |
| 845              | Ticuna (Arara) | 2545                     | 846               | Ticuna (Tarapaca) | 2794                     | AV                                                                                   | R,A                                                            |
