# Supplementary material for: Population Structure in a Comprehensive Genomic Data Set on Human Microsatellite Variation
Source: Oxford University Press journal article supplement (doi:10.1534/g3.113.005728), 2013-03-28
Supplement: 005728_tables20.pdf [file 005728_tables20.pdf]

**Table S20** 267 human populations present in the combined data set together with their geographic coordinates, sample sizes, and mean heterozygosities

| Population      |                   | Location                 | Geographic region  | Latitude<br>[Degrees North] | Longitude<br>[Degrees East] | Sample size |        |        | Unbiased heterozygosity |                | Source |
|-----------------|-------------------|--------------------------|--------------------|-----------------------------|-----------------------------|-------------|--------|--------|-------------------------|----------------|--------|
| ID              | Name              |                          |                    |                             |                             | MS5795      | MS5547 | MS5435 | Mean                    | SD across loci |        |
| 20              | Orcadian          | Orkney Islands           | Europe             | 59                          | -3                          | 16          | 15     | 15     | 0.724                   | 0.096          | [4-6]  |
| 21              | Adygei            | Russia (Caucasus)        | Europe             | 44                          | 39                          | 17          | 17     | 17     | 0.728                   | 0.088          | [4-6]  |
| 22              | Russian           | Russia                   | Europe             | 61                          | 40                          | 25          | 25     | 25     | 0.731                   | 0.084          | [4-6]  |
| 24              | Basque            | France                   | Europe             | 43                          | 0                           | 24          | 24     | 24     | 0.718                   | 0.096          | [4-6]  |
| 25              | French            | France                   | Europe             | 46                          | 2                           | 29          | 28     | 28     | 0.730                   | 0.083          | [4-6]  |
| 27              | Italian           | Italy (Bergamo)          | Europe             | 46                          | 10                          | 13          | 13     | 13     | 0.727                   | 0.095          | [4-6]  |
| 28              | Sardinian         | Italy                    | Europe             | 40                          | 9                           | 28          | 28     | 28     | 0.723                   | 0.086          | [4-6]  |
| 29              | Tuscan            | Italy                    | Europe             | 43                          | 11                          | 8           | 8      | 8      | 0.735                   | 0.109          | [4-6]  |
| 34              | Mozabite          | Algeria (Mzab)           | Middle East        | 32                          | 3                           | 30          | 29     | 29     | 0.738                   | 0.082          | [4-6]  |
| 36              | Bedouin           | Israel (Negev)           | Middle East        | 31                          | 35                          | 48          | 47     | 46     | 0.734                   | 0.078          | [4-6]  |
| 37              | Druze             | Israel (Carmel)          | Middle East        | 32                          | 35                          | 47          | 44     | 42     | 0.722                   | 0.085          | [4-6]  |
| 38              | Palestinian       | Israel (Central)         | Middle East        | 32                          | 35                          | 51          | 50     | 46     | 0.732                   | 0.080          | [4-6]  |
| 50              | Balochi           | Pakistan                 | Central/South Asia | 30.49871492                 | 66.5                        | 25          | 24     | 24     | 0.733                   | 0.084          | [4-6]  |
| 51              | Brahui            | Pakistan                 | Central/South Asia | 30.49871492                 | 66.5                        | 25          | 25     | 25     | 0.730                   | 0.087          | [4-6]  |
| 52              | Burusho           | Pakistan                 | Central/South Asia | 36.49838568                 | 74                          | 25          | 25     | 25     | 0.729                   | 0.085          | [4-6]  |
| 54              | Hazara            | Pakistan                 | Central/South Asia | 33.49855601                 | 70                          | 23          | 22     | 21     | 0.728                   | 0.093          | [4-6]  |
| 56              | Kalash            | Pakistan                 | Central/South Asia | 35.99366014                 | 71.5                        | 25          | 24     | 23     | 0.698                   | 0.112          | [4-6]  |
| 57              | Makrani           | Pakistan                 | Central/South Asia | 26                          | 64                          | 24          | 24     | 24     | 0.737                   | 0.086          | [4-6]  |
| 58              | Pathan            | Pakistan                 | Central/South Asia | 33.48700562                 | 70.5                        | 24          | 24     | 24     | 0.734                   | 0.088          | [4-6]  |
| 59              | Sindhi            | Pakistan                 | Central/South Asia | 25.49063551                 | 69                          | 25          | 24     | 24     | 0.733                   | 0.084          | [4-6]  |
| 81 <sup>a</sup> | Piapoco           | Colombia                 | America            | 3                           | -68                         | 13          | 7      | 7      | 0.625                   | 0.162          | [4-6]  |
| 82              | Karitiana         | Brazil                   | America            | -10                         | -63                         | 24          | 14     | 14     | 0.561                   | 0.178          | [4-6]  |
| 83              | Surui             | Brazil                   | America            | -11                         | -62                         | 21          | 9      | 8      | 0.507                   | 0.203          | [4-6]  |
| 86              | Maya              | Mexico                   | America            | 19                          | -91                         | 25          | 22     | 21     | 0.676                   | 0.122          | [4-6]  |
| 87              | Pima              | Mexico                   | America            | 29                          | -108                        | 25          | 14     | 14     | 0.617                   | 0.161          | [4-6]  |
| 430             | Bantu (S. Africa) | Southern Africa          | Africa             | -25.56926433                | 24.25                       | 8           | 8      | 8      | 0.765                   | 0.103          | [4-6]  |
| 441             | Bantu (Kenya)     | Kenya                    | Africa             | -3                          | 37                          | 12          | 11     | 11     | 0.758                   | 0.097          | [4-6]  |
| 464             | Mandenka          | Senegal                  | Africa             | 12                          | -12                         | 24          | 24     | 22     | 0.753                   | 0.085          | [4-6]  |
| 465             | Yoruba            | Nigeria                  | Africa             | 7.995094727                 | 5                           | 25          | 22     | 22     | 0.760                   | 0.083          | [4-6]  |
| 488             | Biaka Pygmy       | Central African Republic | Africa             | 4                           | 17                          | 32          | 27     | 23     | 0.758                   | 0.084          | [4-6]  |
| 489             | Mbuti Pygmy       | Congo                    | Africa             | 1                           | 29                          | 15          | 13     | 13     | 0.752                   | 0.099          | [4-6]  |
| 494             | San               | Namibia                  | Africa             | -21                         | 20                          | 7           | 6      | 6      | 0.745                   | 0.128          | [4-6]  |

|     |                |            |                    |             |        |    |    |    |       |       |       |
|-----|----------------|------------|--------------------|-------------|--------|----|----|----|-------|-------|-------|
| 601 | Han            | China      | East Asia          | 32.26566812 | 114    | 34 | 34 | 34 | 0.708 | 0.105 | [4-6] |
| 602 | Han (N. China) | China      | East Asia          | 32.26566812 | 114    | 10 | 10 | 10 | 0.714 | 0.117 | [4-6] |
| 606 | Dai            | China      | East Asia          | 21          | 100    | 10 | 10 | 10 | 0.700 | 0.133 | [4-6] |
| 607 | Daur           | China      | East Asia          | 48.49753416 | 124    | 10 | 10 | 10 | 0.711 | 0.119 | [4-6] |
| 608 | Hezhen         | China      | East Asia          | 47.4976192  | 133.5  | 9  | 9  | 9  | 0.707 | 0.119 | [4-6] |
| 611 | Lahu           | China      | East Asia          | 22          | 100    | 10 | 8  | 8  | 0.688 | 0.139 | [4-6] |
| 612 | Miao           | China      | East Asia          | 28          | 109    | 10 | 10 | 10 | 0.700 | 0.127 | [4-6] |
| 613 | Oroqen         | China      | East Asia          | 50.43389257 | 126.5  | 10 | 9  | 9  | 0.696 | 0.130 | [4-6] |
| 615 | She            | China      | East Asia          | 27          | 119    | 10 | 10 | 10 | 0.694 | 0.122 | [4-6] |
| 616 | Tujia          | China      | East Asia          | 29          | 109    | 10 | 10 | 10 | 0.702 | 0.127 | [4-6] |
| 617 | Tu             | China      | East Asia          | 36          | 101    | 10 | 10 | 10 | 0.707 | 0.118 | [4-6] |
| 618 | Xibo           | China      | East Asia          | 43.49792973 | 81.5   | 9  | 9  | 9  | 0.709 | 0.126 | [4-6] |
| 619 | Yi             | China      | East Asia          | 28          | 103    | 10 | 10 | 10 | 0.709 | 0.124 | [4-6] |
| 622 | Mongola        | China      | East Asia          | 45          | 111    | 10 | 10 | 10 | 0.711 | 0.122 | [4-6] |
| 625 | Naxi           | China      | East Asia          | 26          | 100    | 10 | 9  | 9  | 0.699 | 0.122 | [4-6] |
| 629 | Uygur          | China      | Central/South Asia | 44          | 81     | 10 | 10 | 10 | 0.733 | 0.108 | [4-6] |
| 677 | Cambodian      | Cambodia   | East Asia          | 12          | 105    | 11 | 10 | 10 | 0.711 | 0.127 | [4-6] |
| 684 | Japanese       | Japan      | East Asia          | 38          | 138    | 29 | 29 | 29 | 0.702 | 0.113 | [4-6] |
| 699 | Yakut          | Siberia    | East Asia          | 62.98287845 | 129.5  | 25 | 25 | 25 | 0.700 | 0.104 | [4-6] |
| 690 | Tundra Nentsi  | Siberia    | East Asia          | 66.08       | 76.5   | 13 | 13 | 13 | 0.716 | 0.105 | [7]   |
| 811 | Chipewyan      | Canada     | America            | 59.55       | -107.3 | 28 | 24 | 17 | 0.671 | 0.115 | [7]   |
| 812 | Cree           | Canada     | America            | 50.33       | -102.5 | 17 | 16 | 16 | 0.695 | 0.116 | [7]   |
| 813 | Ojibwa         | Canada     | America            | 46.5        | -81    | 20 | 16 | 12 | 0.696 | 0.115 | [7]   |
| 821 | Kaqchikel      | Guatemala  | America            | 15          | -91    | 12 | 11 | 11 | 0.665 | 0.138 | [7]   |
| 822 | Mixtec         | Mexico     | America            | 17          | -97    | 19 | 17 | 17 | 0.644 | 0.143 | [7]   |
| 823 | Mixe           | Mexico     | America            | 17          | -96    | 20 | 20 | 20 | 0.641 | 0.134 | [7]   |
| 824 | Zapotec        | Mexico     | America            | 16          | -97    | 17 | 17 | 17 | 0.665 | 0.140 | [7]   |
| 831 | Guaymi         | Panama     | America            | 8.5         | -82    | 16 | 16 | 14 | 0.582 | 0.176 | [7]   |
| 832 | Cabecar        | Costa Rica | America            | 9.5         | -84    | 20 | 19 | 17 | 0.623 | 0.147 | [7]   |
| 833 | Aymara         | Chile      | America            | -22         | -70    | 18 | 18 | 18 | 0.660 | 0.132 | [7]   |
| 834 | Huilliche      | Chile      | America            | -41         | -73    | 19 | 19 | 19 | 0.667 | 0.120 | [7]   |
| 835 | Guarani        | Brazil     | America            | -23         | -54    | 10 | 8  | 8  | 0.649 | 0.146 | [7]   |
| 836 | Ache           | Paraguay   | America            | -24         | -56    | 17 | 16 | 14 | 0.483 | 0.207 | [7]   |
| 837 | Kaingang       | Brazil     | America            | -24         | -52.5  | 5  | 5  | 5  | 0.624 | 0.189 | [7]   |
| 838 | Quechua        | Peru       | America            | -14         | -74    | 20 | 20 | 20 | 0.669 | 0.124 | [7]   |
| 841 | Kogi           | Colombia   | America            | 11          | -74    | 16 | 8  | 7  | 0.580 | 0.180 | [7]   |

|                  |                   |                   |                    |             |             |     |     |     |       |       |          |
|------------------|-------------------|-------------------|--------------------|-------------|-------------|-----|-----|-----|-------|-------|----------|
| 842              | Zenu              | Colombia          | America            | 9           | -75         | 18  | 16  | 13  | 0.643 | 0.143 | [7]      |
| 843              | Inga              | Colombia          | America            | 1           | -77         | 16  | 15  | 14  | 0.640 | 0.140 | [7]      |
| 844              | Wayuu             | Colombia          | America            | 11          | -73         | 17  | 15  | 15  | 0.671 | 0.126 | [7]      |
| 845              | Ticuna (Arara)    | Colombia          | America            | -4          | -70         | 15  | 14  | 14  | 0.590 | 0.163 | [7]      |
| 846              | Ticuna (Tarapaca) | Colombia          | America            | -4          | -70         | 18  | 12  | 10  | 0.587 | 0.175 | [7]      |
| 847              | Embera            | Colombia          | America            | 7           | -76         | 11  | 7   | 7   | 0.625 | 0.158 | [7]      |
| 848              | Waunana           | Colombia          | America            | 5           | -77         | 20  | 12  | 11  | 0.625 | 0.160 | [7]      |
| 849              | Arhuaco           | Colombia          | America            | 11          | -73.8       | 16  | 9   | 9   | 0.633 | 0.148 | [7]      |
| 871              | Oriente           | Guatemala         | Latino             | 14.633333   | -90.516667  | 19  | 19  | 19  | 0.727 | 0.085 | [8]      |
| 872              | Mexico City       | Mexico            | Latino             | 19.4        | -99.2       | 19  | 19  | 19  | 0.732 | 0.088 | [8]      |
| 881              | CVCR              | Costa Rica        | Latino             | 9.933333    | -84.083333  | 20  | 20  | 20  | 0.736 | 0.084 | [8]      |
| 882              | Quetalmahue       | Chile             | Latino             | -41.466667  | -73.533333  | 20  | 20  | 19  | 0.703 | 0.103 | [8]      |
| 883              | Paposo            | Chile             | Latino             | -25.05      | -70.266667  | 20  | 19  | 18  | 0.710 | 0.099 | [8]      |
| 884              | Catamarca         | Argentina         | Latino             | -28.466667  | -65.783333  | 12  | 12  | 12  | 0.723 | 0.101 | [8]      |
| 885              | Salta             | Argentina         | Latino             | -24.783333  | -65.416667  | 19  | 19  | 18  | 0.703 | 0.107 | [8]      |
| 886              | Tucuman           | Argentina         | Latino             | -26.816667  | -65.216667  | 19  | 19  | 19  | 0.737 | 0.086 | [8]      |
| 887              | RGS               | Brazil            | Latino             | -31         | -54         | 20  | 20  | 20  | 0.744 | 0.076 | [8]      |
| 891              | Pasto             | Colombia          | Latino             | 1.216667    | -77.283333  | 19  | 19  | 19  | 0.718 | 0.092 | [8]      |
| 892              | Peque             | Colombia          | Latino             | 7.316667    | -75.833333  | 20  | 19  | 19  | 0.708 | 0.099 | [8]      |
| 893              | Medellin          | Colombia          | Latino             | 6.25        | -75.583333  | 20  | 20  | 20  | 0.738 | 0.082 | [8]      |
| 894              | Cundinamarca      | Colombia          | Latino             | 4.6         | -74.083333  | 19  | 19  | 19  | 0.721 | 0.096 | [8]      |
| 901 <sup>b</sup> | Ashkenazi Jewish  | Israel (Ashkelon) | Europe             | 31.666667   | 34.566667   | 19  | 19  | 19  | 0.732 | 0.088 | [9]      |
| 902 <sup>b</sup> | Moroccan Jewish   | Israel (Ashkelon) | Middle East        | 31.666667   | 34.566667   | 20  | 20  | 20  | 0.728 | 0.089 | [9]      |
| 903 <sup>b</sup> | Tunisian Jewish   | Israel (Ashkelon) | Middle East        | 31.666667   | 34.566667   | 20  | 20  | 18  | 0.722 | 0.095 | [9]      |
| 904 <sup>b</sup> | Turkish Jewish    | Israel (Ashkelon) | Middle East        | 31.666667   | 34.566667   | 20  | 20  | 20  | 0.735 | 0.084 | [9]      |
| 501              | Assamese          | India             | Central/South Asia | 26          | 93          | 25  | 25  | 25  | 0.732 | 0.086 | [10]     |
| 502              | Bengali           | India             | Central/South Asia | 23.25766454 | 87.66666667 | 27  | 27  | 27  | 0.732 | 0.087 | [10]     |
| 504 <sup>c</sup> | Gujarati          | India             | Central/South Asia | 23          | 72          | 252 | 234 | 229 | 0.725 | 0.083 | [10, 11] |
| 505              | Hindi             | India             | Central/South Asia | 26.98091726 | 78.39357143 | 28  | 28  | 28  | 0.729 | 0.087 | [10]     |
| 506              | Kannada           | India             | Central/South Asia | 15          | 75          | 24  | 24  | 24  | 0.731 | 0.088 | [10]     |
| 507              | Kashmiri          | India             | Central/South Asia | 32.44       | 74.54       | 25  | 25  | 25  | 0.735 | 0.087 | [10]     |
| 508              | Konkani           | India             | Central/South Asia | 14.57081522 | 75.13095238 | 42  | 42  | 42  | 0.726 | 0.083 | [10]     |
| 509              | Malayalam         | India             | Central/South Asia | 10          | 76.25       | 25  | 25  | 25  | 0.729 | 0.091 | [10]     |
| 510              | Marathi           | India             | Central/South Asia | 19.81684261 | 75.94230769 | 26  | 26  | 26  | 0.734 | 0.084 | [10]     |
| 511              | Marwari           | India             | Central/South Asia | 26.67171131 | 74.264      | 25  | 25  | 25  | 0.725 | 0.092 | [10]     |
| 512              | Oriya             | India             | Central/South Asia | 20          | 85          | 26  | 26  | 26  | 0.728 | 0.088 | [10]     |

|                   |                                   |             |                    |             |             |    |    |    |       |       |      |
|-------------------|-----------------------------------|-------------|--------------------|-------------|-------------|----|----|----|-------|-------|------|
| 513               | Parsi                             | India       | Central/South Asia | 19          | 72.8        | 25 | 25 | 25 | 0.724 | 0.090 | [10] |
| 514               | Punjabi                           | India       | Central/South Asia | 30.47159766 | 75.29071429 | 27 | 27 | 27 | 0.732 | 0.085 | [10] |
| 515               | Tamil                             | India       | Central/South Asia | 11.10167224 | 77.94827586 | 29 | 29 | 29 | 0.732 | 0.087 | [10] |
| 516               | Telugu                            | India       | Central/South Asia | 15.9257581  | 79.62962963 | 27 | 27 | 27 | 0.727 | 0.091 | [10] |
| 1001 <sup>d</sup> | East Highlands<br>(Gimi & Goroka) | New Guinea  | Oceania            | -6.083      | 145.4       | 29 | 28 | 27 | 0.677 | 0.134 | [2]  |
| 1003              | Sepik                             | New Guinea  | Oceania            | -3.583      | 143.333     | 20 | 20 | 20 | 0.682 | 0.134 | [2]  |
| 1004              | Kove                              | New Britain | Oceania            | -5.4667     | 148.95      | 25 | 24 | 20 | 0.677 | 0.125 | [2]  |
| 1005              | Anem (Keraiai)                    | New Britain | Oceania            | -5.45       | 148.9833    | 16 | 14 | 11 | 0.684 | 0.128 | [2]  |
| 1006              | Anem (Purailing)                  | New Britain | Oceania            | -5.45       | 148.984     | 17 | 14 | 14 | 0.674 | 0.136 | [2]  |
| 1007              | Mangseng                          | New Britain | Oceania            | -5.933      | 150.7       | 20 | 16 | 15 | 0.697 | 0.121 | [2]  |
| 1008              | Melamela                          | New Britain | Oceania            | -5          | 151.25      | 25 | 24 | 20 | 0.685 | 0.119 | [2]  |
| 1009              | Mengen                            | New Britain | Oceania            | -5.1        | 151.4       | 23 | 20 | 20 | 0.688 | 0.129 | [2]  |
| 1010              | Sulka (Ganai)                     | New Britain | Oceania            | -4.5        | 152.333     | 22 | 17 | 17 | 0.689 | 0.128 | [2]  |
| 1011              | Sulka (Watwat)                    | New Britain | Oceania            | -4.483      | 152.3       | 15 | 15 | 14 | 0.686 | 0.136 | [2]  |
| 1012              | Kol                               | New Britain | Oceania            | -5.383      | 151.633     | 20 | 18 | 16 | 0.672 | 0.135 | [2]  |
| 1013              | Nakanai (Bileki)                  | New Britain | Oceania            | -5.75       | 150.8       | 24 | 24 | 20 | 0.686 | 0.123 | [2]  |
| 1014              | Nakanai (Loso)                    | New Britain | Oceania            | -5.483      | 150.8       | 17 | 16 | 15 | 0.657 | 0.135 | [2]  |
| 1015              | Mamusi (Kisiluvi)                 | New Britain | Oceania            | -5.7333     | 151.0833    | 22 | 20 | 19 | 0.655 | 0.138 | [2]  |
| 1016              | Mamusi (Lingite)                  | New Britain | Oceania            | -5.867      | 151.1       | 20 | 16 | 16 | 0.646 | 0.148 | [2]  |
| 1017              | Ata (Uasilau)                     | New Britain | Oceania            | -5.683      | 151         | 24 | 24 | 23 | 0.649 | 0.136 | [2]  |
| 1018              | Ata (Lugei)                       | New Britain | Oceania            | -5.6        | 151         | 23 | 18 | 17 | 0.661 | 0.130 | [2]  |
| 1019              | Baining (Malasait)                | New Britain | Oceania            | -4.467      | 151.9       | 25 | 22 | 21 | 0.620 | 0.155 | [2]  |
| 1020              | Baining (Marabu)                  | New Britain | Oceania            | -4.633      | 152.3       | 25 | 18 | 18 | 0.624 | 0.156 | [2]  |
| 1021              | Baining (Rangulit)                | New Britain | Oceania            | -4.4        | 151.9       | 22 | 19 | 18 | 0.628 | 0.151 | [2]  |
| 1022              | Tolai (Kabakada)                  | New Britain | Oceania            | -4.483      | 152.1       | 18 | 17 | 16 | 0.684 | 0.132 | [2]  |
| 1023              | Tolai (Vunairoto)                 | New Britain | Oceania            | -4.2        | 152.1       | 21 | 21 | 19 | 0.690 | 0.124 | [2]  |
| 1024              | Mussau                            | Mussau      | Oceania            | -1.583      | 149.733     | 25 | 22 | 22 | 0.691 | 0.121 | [2]  |
| 1025              | Lavongai (North)                  | New Hanover | Oceania            | -2.433      | 150.35      | 24 | 21 | 21 | 0.686 | 0.122 | [2]  |
| 1026              | Lavongai (South)                  | New Hanover | Oceania            | -2.5667     | 150.4333    | 22 | 19 | 17 | 0.688 | 0.126 | [2]  |
| 1027              | Tigak                             | New Ireland | Oceania            | -2.6        | 150.87      | 23 | 23 | 22 | 0.691 | 0.120 | [2]  |
| 1028              | Nalik                             | New Ireland | Oceania            | -2.983      | 151.52      | 24 | 19 | 18 | 0.693 | 0.122 | [2]  |
| 1029              | Notsi                             | New Ireland | Oceania            | -3.05       | 151.65      | 23 | 19 | 19 | 0.690 | 0.126 | [2]  |
| 1030              | Kuot (Kabil)                      | New Ireland | Oceania            | -3.067      | 151.7       | 25 | 22 | 20 | 0.684 | 0.124 | [2]  |
| 1031              | Kuot (Lamalaua)                   | New Ireland | Oceania            | -3          | 151.5       | 18 | 17 | 16 | 0.690 | 0.128 | [2]  |
| 1032              | Madak                             | New Ireland | Oceania            | -3.1        | 151.7       | 24 | 20 | 17 | 0.687 | 0.126 | [2]  |

|                   |                   |              |           |         |         |    |    |    |       |       |     |
|-------------------|-------------------|--------------|-----------|---------|---------|----|----|----|-------|-------|-----|
| 1033              | Saposa            | Bougainville | Oceania   | -5.5833 | 154.67  | 25 | 24 | 20 | 0.685 | 0.126 | [2] |
| 1034              | Teop              | Bougainville | Oceania   | -5.85   | 155.18  | 23 | 19 | 18 | 0.690 | 0.128 | [2] |
| 1035              | Aita              | Bougainville | Oceania   | -5.9    | 155.083 | 25 | 19 | 17 | 0.643 | 0.143 | [2] |
| 1037 <sup>e</sup> | Nasioi            | Bougainville | Oceania   | -6.483  | 155.833 | 23 | 14 | 12 | 0.667 | 0.147 | [2] |
| 1040              | Micronesians      | Micronesia   | Oceania   | 12.5    | 150     | 16 | 16 | 16 | 0.693 | 0.123 | [2] |
| 1041              | Samoans           | Polynesia    | Oceania   | -13.35  | -172.2  | 10 | 10 | 10 | 0.680 | 0.142 | [2] |
| 1042              | Maoris            | Polynesia    | Oceania   | -41     | 174     | 30 | 27 | 27 | 0.662 | 0.122 | [2] |
| 1043              | Ami               | Taiwan       | East Asia | 23.3    | 121     | 25 | 23 | 23 | 0.672 | 0.126 | [2] |
| 1044              | Taruko            | Taiwan       | East Asia | 23.3    | 121     | 25 | 24 | 23 | 0.653 | 0.142 | [2] |
| 1101              | Hadza             | Tanzania     | Africa    | -3.8    | 35.3    | 61 | 61 | 57 | 0.730 | 0.092 | [3] |
| 1102              | Sandawe           | Tanzania     | Africa    | -5.5    | 35.5    | 51 | 51 | 51 | 0.763 | 0.074 | [3] |
| 1103              | Iraqw             | Tanzania     | Africa    | -4      | 35.5    | 46 | 46 | 45 | 0.758 | 0.073 | [3] |
| 1104              | Turu              | Tanzania     | Africa    | -5      | 35      | 32 | 32 | 32 | 0.768 | 0.072 | [3] |
| 1105              | Mbugwe            | Tanzania     | Africa    | -3.8    | 35.8    | 21 | 21 | 21 | 0.765 | 0.082 | [3] |
| 1106              | Rangi             | Tanzania     | Africa    | -5      | 36      | 36 | 36 | 36 | 0.765 | 0.077 | [3] |
| 1107              | Burunge           | Tanzania     | Africa    | -5.3    | 36      | 21 | 21 | 21 | 0.767 | 0.082 | [3] |
| 1108              | Maasai (Tanzania) | Tanzania     | Africa    | -4      | 37      | 36 | 36 | 36 | 0.767 | 0.072 | [3] |
| 1109              | Akie              | Tanzania     | Africa    | -5      | 37.5    | 23 | 23 | 23 | 0.756 | 0.087 | [3] |
| 1110              | Pare              | Tanzania     | Africa    | -4.5    | 38      | 23 | 23 | 22 | 0.762 | 0.082 | [3] |
| 1111              | Mbugu             | Tanzania     | Africa    | -4.8    | 38.5    | 22 | 22 | 22 | 0.750 | 0.084 | [3] |
| 1112              | Baka              | Cameroon     | Africa    | 2.5     | 13.5    | 48 | 48 | 48 | 0.761 | 0.083 | [3] |
| 1113              | Bakola            | Cameroon     | Africa    | 2.8     | 10      | 42 | 42 | 42 | 0.760 | 0.082 | [3] |
| 1114              | Bedzan            | Cameroon     | Africa    | 5.5     | 11.6    | 17 | 16 | 15 | 0.756 | 0.094 | [3] |
| 1115              | Mvae              | Cameroon     | Africa    | 3       | 12      | 24 | 24 | 24 | 0.764 | 0.081 | [3] |
| 1116              | Ngumba            | Cameroon     | Africa    | 3       | 10.3    | 26 | 26 | 26 | 0.762 | 0.083 | [3] |
| 1117              | Fulani (Adamawa)  | Cameroon     | Africa    | 9       | 13.5    | 41 | 41 | 41 | 0.755 | 0.078 | [3] |
| 1118              | Kanuri            | Cameroon     | Africa    | 11.3    | 14.3    | 31 | 31 | 31 | 0.760 | 0.079 | [3] |
| 1119              | Mada              | Cameroon     | Africa    | 10.8    | 14.1    | 28 | 28 | 28 | 0.754 | 0.082 | [3] |
| 1120              | Zime              | Cameroon     | Africa    | 9       | 14.5    | 30 | 30 | 30 | 0.763 | 0.082 | [3] |
| 1121              | Ouldeme           | Cameroon     | Africa    | 11      | 14.3    | 26 | 26 | 26 | 0.753 | 0.085 | [3] |
| 1122              | Giziga            | Cameroon     | Africa    | 10.3    | 14.3    | 24 | 24 | 24 | 0.756 | 0.086 | [3] |
| 1123              | Mandara           | Cameroon     | Africa    | 11.3    | 14      | 26 | 26 | 26 | 0.756 | 0.080 | [3] |
| 1124              | Baggara           | Cameroon     | Africa    | 12.5    | 14.5    | 23 | 23 | 23 | 0.758 | 0.079 | [3] |
| 1125              | Kotoko            | Cameroon     | Africa    | 11.8    | 14.8    | 17 | 17 | 17 | 0.756 | 0.086 | [3] |
| 1126              | Zulgo             | Cameroon     | Africa    | 10.8    | 14      | 22 | 22 | 22 | 0.751 | 0.087 | [3] |
| 1127              | Bamoun            | Cameroon     | Africa    | 5.5     | 10.8    | 31 | 31 | 30 | 0.760 | 0.081 | [3] |

|                   |                   |          |               |           |            |    |    |    |       |       |     |
|-------------------|-------------------|----------|---------------|-----------|------------|----|----|----|-------|-------|-----|
| 1128              | Banen             | Cameroon | Africa        | 4.8       | 10.8       | 25 | 25 | 25 | 0.760 | 0.084 | [3] |
| 1129              | Bafia             | Cameroon | Africa        | 4.8       | 11         | 30 | 30 | 30 | 0.762 | 0.082 | [3] |
| 1130              | Lemande           | Cameroon | Africa        | 4.5       | 11         | 26 | 26 | 26 | 0.758 | 0.083 | [3] |
| 1131              | Batanga           | Cameroon | Africa        | 3         | 10         | 20 | 20 | 20 | 0.757 | 0.089 | [3] |
| 1132              | Podokwo           | Cameroon | Africa        | 11        | 12.1       | 30 | 30 | 29 | 0.751 | 0.084 | [3] |
| 1159              | Yoruba            | Nigeria  | Africa        | 8         | 4          | 25 | 25 | 25 | 0.756 | 0.086 | [3] |
| 1185              | Bassange          | Nigeria  | Africa        | 9         | 5.5        | 20 | 20 | 20 | 0.754 | 0.090 | [3] |
| 1186              | Igbo              | Nigeria  | Africa        | 6         | 7          | 28 | 28 | 28 | 0.760 | 0.084 | [3] |
| 1187              | Igala             | Nigeria  | Africa        | 7         | 7          | 17 | 17 | 17 | 0.758 | 0.084 | [3] |
| 1188              | Gwari             | Nigeria  | Africa        | 10        | 7          | 22 | 22 | 22 | 0.758 | 0.086 | [3] |
| 1189              | Hausa (Nigeria)   | Nigeria  | Africa        | 12        | 8          | 16 | 16 | 16 | 0.755 | 0.093 | [3] |
| 1190              | Beja (Banuamir)   | Sudan    | Middle East   | 21        | 36         | 23 | 23 | 23 | 0.752 | 0.080 | [3] |
| 1191              | Dinka             | Sudan    | Africa        | 8         | 30         | 16 | 16 | 16 | 0.750 | 0.090 | [3] |
| 1192              | Datoga            | Tanzania | Africa        | -4.5      | 35.5       | 54 | 54 | 54 | 0.760 | 0.072 | [3] |
| 1193              | Sukuma            | Tanzania | Africa        | -3        | 33.5       | 10 | 10 | 10 | 0.766 | 0.090 | [3] |
| 1194              | Gogo              | Tanzania | Africa        | -6        | 36         | 13 | 13 | 13 | 0.767 | 0.084 | [3] |
| 1195              | Fiome (Gorowa)    | Tanzania | Africa        | -4.3      | 35.8       | 22 | 22 | 22 | 0.762 | 0.081 | [3] |
| 1196              | Iyassa            | Cameroon | Africa        | 2.5       | 9.8        | 37 | 37 | 37 | 0.761 | 0.081 | [3] |
| 1197              | Fang              | Cameroon | Africa        | 2.5       | 13         | 19 | 19 | 19 | 0.759 | 0.087 | [3] |
| 1198              | Mabea             | Cameroon | Africa        | 2.9       | 10.3       | 13 | 13 | 13 | 0.761 | 0.090 | [3] |
| 1199              | Yambassa          | Cameroon | Africa        | 4.8       | 11.3       | 17 | 17 | 17 | 0.758 | 0.090 | [3] |
| 1200              | Tikar (South)     | Cameroon | Africa        | 5.5       | 11.5       | 21 | 21 | 20 | 0.763 | 0.085 | [3] |
| 1201              | Tikar (North)     | Cameroon | Africa        | 6.3       | 11.5       | 13 | 13 | 13 | 0.759 | 0.092 | [3] |
| 1202              | Ntumu             | Cameroon | Africa        | 2.3       | 10.5       | 11 | 11 | 11 | 0.762 | 0.091 | [3] |
| 1203              | Massa             | Cameroon | Africa        | 10.3      | 15.3       | 15 | 15 | 15 | 0.754 | 0.093 | [3] |
| 1204              | Tupuri            | Cameroon | Africa        | 10.3      | 14.8       | 22 | 22 | 22 | 0.757 | 0.086 | [3] |
| 1205              | Bulu              | Cameroon | Africa        | 3         | 11         | 22 | 22 | 22 | 0.765 | 0.081 | [3] |
| 1206              | Ashanti           | Ghana    | Africa        | 6         | -1         | 15 | 15 | 15 | 0.759 | 0.092 | [3] |
| 1207              | Brong             | Ghana    | Africa        | 7.5       | -2         | 26 | 26 | 26 | 0.757 | 0.084 | [3] |
| 1209 <sup>b</sup> | Chicago           | USA      | Afro-European | 41.881944 | -87.627778 | 15 | 15 | 15 | 0.766 | 0.082 | [3] |
| 1210 <sup>b</sup> | Pittsburgh        | USA      | Afro-European | 40.441667 | -80        | 21 | 21 | 21 | 0.766 | 0.079 | [3] |
| 1211 <sup>b</sup> | Baltimore         | USA      | Afro-European | 39.283333 | -76.616667 | 44 | 44 | 44 | 0.767 | 0.073 | [3] |
| 1212              | North Carolina    | USA      | Afro-European | -         | -          | 18 | 18 | 18 | 0.768 | 0.080 | [3] |
| 1214              | Maasai (Mumonyot) | Kenya    | Africa        | 0.6       | 37         | 12 | 12 | 12 | 0.759 | 0.083 | [3] |
| 1215              | Maasai (Ilgwesi)  | Kenya    | Africa        | 0.3       | 36.8       | 21 | 21 | 21 | 0.758 | 0.082 | [3] |
| 1216              | Samburu           | Kenya    | Africa        | 1.5       | 37         | 18 | 18 | 18 | 0.763 | 0.082 | [3] |

|      |                   |                          |             |      |      |    |    |    |       |       |     |
|------|-------------------|--------------------------|-------------|------|------|----|----|----|-------|-------|-----|
| 1217 | Yaaku             | Kenya                    | Africa      | 0.5  | 37   | 19 | 19 | 19 | 0.750 | 0.082 | [3] |
| 1219 | Sambaa            | Tanzania                 | Africa      | -4.5 | 38.3 | 18 | 18 | 18 | 0.760 | 0.085 | [3] |
| 1220 | Dorobo            | Tanzania                 | Africa      | -5   | 37   | 10 | 10 | 10 | 0.759 | 0.097 | [3] |
| 1222 | Australian        | Australia                | Oceania     | -    | -    | 10 | 9  | 9  | 0.719 | 0.121 | [3] |
| 1223 | Beja (Hadandawa)  | Sudan                    | Middle East | 21   | 36   | 19 | 19 | 19 | 0.745 | 0.084 | [3] |
| 1224 | Tugen             | Kenya                    | Africa      | 0.8  | 35.8 | 22 | 22 | 22 | 0.757 | 0.077 | [3] |
| 1225 | Burji             | Ethiopia                 | Africa      | 5.5  | 37.8 | 24 | 24 | 24 | 0.763 | 0.076 | [3] |
| 1226 | Marakwet          | Kenya                    | Africa      | 1.3  | 35.5 | 14 | 14 | 14 | 0.754 | 0.094 | [3] |
| 1227 | Luhya             | Kenya                    | Africa      | 0.5  | 34.5 | 17 | 17 | 17 | 0.763 | 0.086 | [3] |
| 1228 | Luo               | Kenya                    | Africa      | -0.5 | 34.5 | 28 | 28 | 28 | 0.763 | 0.082 | [3] |
| 1229 | Kikuyu            | Kenya                    | Africa      | -1   | 37   | 21 | 21 | 21 | 0.764 | 0.080 | [3] |
| 1230 | Sengwer           | Kenya                    | Africa      | 1    | 35   | 21 | 21 | 21 | 0.754 | 0.079 | [3] |
| 1231 | Okiek             | Kenya                    | Africa      | 0.3  | 36   | 22 | 22 | 22 | 0.746 | 0.085 | [3] |
| 1232 | Wata              | Kenya                    | Africa      | 3.5  | 37   | 6  | 6  | 6  | 0.762 | 0.105 | [3] |
| 1233 | Nandi             | Kenya                    | Africa      | 0    | 35.5 | 11 | 11 | 11 | 0.761 | 0.094 | [3] |
| 1234 | El Molo           | Kenya                    | Africa      | 2.8  | 36.8 | 16 | 16 | 16 | 0.749 | 0.088 | [3] |
| 1235 | Gabra             | Kenya                    | Africa      | 3    | 37.5 | 16 | 16 | 16 | 0.755 | 0.083 | [3] |
| 1236 | Sabaot            | Kenya                    | Africa      | 1    | 34.8 | 20 | 20 | 20 | 0.762 | 0.079 | [3] |
| 1237 | Rendille          | Kenya                    | Africa      | 2.3  | 37.5 | 28 | 28 | 28 | 0.755 | 0.075 | [3] |
| 1238 | Turkana           | Kenya                    | Africa      | 3    | 36   | 26 | 26 | 26 | 0.760 | 0.081 | [3] |
| 1239 | Pokot             | Kenya                    | Africa      | 1.5  | 35.5 | 23 | 23 | 22 | 0.755 | 0.082 | [3] |
| 1240 | Borana            | Kenya                    | Africa      | 3    | 38   | 32 | 32 | 32 | 0.760 | 0.078 | [3] |
| 1241 | Maasai (Ilchamus) | Kenya                    | Africa      | 1.5  | 37.1 | 26 | 26 | 26 | 0.759 | 0.079 | [3] |
| 1242 | Konso             | Ethiopia                 | Africa      | 5.5  | 37.5 | 14 | 14 | 14 | 0.762 | 0.090 | [3] |
| 1243 | Laka              | Chad                     | Africa      | 8    | 16   | 33 | 33 | 33 | 0.760 | 0.084 | [3] |
| 1244 | Ngambaye          | Chad                     | Africa      | 9    | 16   | 30 | 30 | 30 | 0.758 | 0.082 | [3] |
| 1245 | Kaba              | Chad                     | Africa      | 8    | 16.8 | 27 | 27 | 27 | 0.760 | 0.080 | [3] |
| 1246 | Bulala            | Chad                     | Africa      | 13   | 18   | 15 | 15 | 15 | 0.754 | 0.089 | [3] |
| 1247 | Kanembou          | Chad                     | Africa      | 14   | 15   | 5  | 5  | 5  | 0.756 | 0.119 | [3] |
| 1248 | Mbum              | Central African Republic | Africa      | 5.5  | 13.5 | 13 | 13 | 13 | 0.755 | 0.099 | [3] |
| 1249 | Tutsi/Hutu        | Rwanda                   | Africa      | -2   | 30   | 8  | 8  | 8  | 0.764 | 0.097 | [3] |
| 1250 | Yakoma            | Central African Republic | Africa      | 4.3  | 22.3 | 6  | 6  | 6  | 0.759 | 0.121 | [3] |
| 1252 | Gbaya             | Central African Republic | Africa      | 5    | 15   | 15 | 15 | 15 | 0.760 | 0.085 | [3] |
| 1253 | Fulani (Mbororo)  | Cameroon                 | Africa      | 11.8 | 14.8 | 13 | 13 | 13 | 0.737 | 0.093 | [3] |
| 1254 | Wimbum            | Cameroon                 | Africa      | 6.5  | 10.8 | 14 | 14 | 14 | 0.756 | 0.095 | [3] |
| 1255 | Batie             | Cameroon                 | Africa      | 4.3  | 11   | 16 | 16 | 16 | 0.760 | 0.093 | [3] |

|      |                     |                           |               |       |      |    |    |    |       |       |     |
|------|---------------------|---------------------------|---------------|-------|------|----|----|----|-------|-------|-----|
| 1256 | Hausa (Cameroon)    | Cameroon                  | Africa        | 10.5  | 14.5 | 27 | 27 | 27 | 0.760 | 0.083 | [3] |
| 1257 | Kongo               | Democratic Republic Congo | Africa        | -5.5  | 15   | 17 | 17 | 17 | 0.759 | 0.088 | [3] |
| 1258 | Barega              | Democratic Republic Congo | Africa        | -3.5  | 28   | 4  | 4  | 4  | 0.763 | 0.135 | [3] |
| 1259 | Baluba              | Democratic Republic Congo | Africa        | -9    | 25   | 5  | 5  | 5  | 0.757 | 0.130 | [3] |
| 1262 | Dioula              | Ivory Coast               | Africa        | 9.5   | -4.5 | 5  | 5  | 5  | 0.756 | 0.119 | [3] |
| 1266 | Ewondo              | Cameroon                  | Africa        | 3.8   | 11.5 | 3  | 3  | 3  | 0.760 | 0.163 | [3] |
| 1267 | Eton                | Cameroon                  | Africa        | 4.3   | 11.5 | 4  | 4  | 4  | 0.764 | 0.130 | [3] |
| 1268 | Nuer                | Sudan                     | Africa        | 8.5   | 31   | 17 | 17 | 17 | 0.750 | 0.087 | [3] |
| 1269 | Shilook             | Sudan                     | Africa        | 10    | 32   | 15 | 15 | 15 | 0.751 | 0.094 | [3] |
| 1270 | Nyimang             | Sudan                     | Africa        | 12.3  | 29.5 | 12 | 12 | 12 | 0.750 | 0.095 | [3] |
| 1271 | Sara (various)      | Chad                      | Africa        | 8     | 17.5 | 26 | 26 | 26 | 0.759 | 0.084 | [3] |
| 1272 | Cape Mixed Ancestry | South Africa (Cape Town)  | Afro-European | -34   | 18.5 | 33 | 33 | 33 | 0.767 | 0.074 | [3] |
| 1273 | Venda               | South Africa              | Africa        | -22.5 | 30   | 11 | 11 | 11 | 0.752 | 0.096 | [3] |
| 1274 | !Xun/Kxoe           | South Africa              | Africa        | -30   | 18   | 6  | 6  | 6  | 0.757 | 0.129 | [3] |
| 1275 | Xhosa               | South Africa              | Africa        | -32   | 28   | 27 | 27 | 27 | 0.762 | 0.086 | [3] |
| 1276 | Koma                | Nigeria                   | Africa        | 8.5   | 12.7 | 9  | 9  | 9  | 0.743 | 0.113 | [3] |
| 1277 | Beta Israel         | Ethiopia                  | Africa        | 12    | 38   | 17 | 17 | 17 | 0.753 | 0.081 | [3] |
| 1278 | Dogon               | Mali                      | Africa        | 14    | -3   | 3  | 3  | 3  | 0.371 | 0.305 | [3] |
| 1280 | Temani              | Yemen                     | Middle East   | 15    | 45   | 18 | 18 | 18 | 0.724 | 0.093 | [3] |
| 1281 | Fulani (Nigeria)    | Nigeria                   | Africa        | 11    | 11   | 4  | 4  | 4  | 0.757 | 0.138 | [3] |

<sup>a</sup>Referred to as 'Colombian' in Rosenberg *et al.* [6], Rosenberg *et al.* [5], and Ramachandran *et al.* [4].

<sup>b</sup>The geographic coordinates of the city where sampling took place are provided.

<sup>c</sup>This population includes the Gujarati individuals studied by Pemberton *et al.* [11].

<sup>d</sup>This population includes the individuals from the HGDP-CEPH Papuan population.

<sup>e</sup>This population includes the individuals from the HGDP-CEPH Melanesian population.
