# Supplementary material for: Population Structure in a Comprehensive Genomic Data Set on Human Microsatellite Variation
Source: Oxford University Press journal article supplement (doi:10.1534/g3.113.005728), 2013-03-28
Supplement: 005728_tables21.pdf [file 005728_tables21.pdf]

**Table S21** The 248 individuals in MS5795 but not in MS5547

| Population |             |                       | Population |               |                       |
|------------|-------------|-----------------------|------------|---------------|-----------------------|
| ID         | Name        | Identification number | ID         | Name          | Identification number |
| 20         | Orcadian    | 801                   | 87         | Pima          | 1049                  |
| 25         | French      | 532                   | 87         | Pima          | 1052                  |
| 34         | Mozabite    | 1281                  | 87         | Pima          | 1054                  |
| 36         | Bedouin     | 633                   | 87         | Pima          | 1061                  |
| 37         | Druze       | 592                   | 441        | Bantu (Kenya) | 1413                  |
| 37         | Druze       | 603                   | 465        | Yoruba        | 921                   |
| 37         | Druze       | 605                   | 465        | Yoruba        | 922                   |
| 38         | Palestinian | 695                   | 465        | Yoruba        | 923                   |
| 50         | Balochi     | 84                    | 488        | Biaka Pygmy   | 451                   |
| 54         | Hazara      | 113                   | 488        | Biaka Pygmy   | 477                   |
| 56         | Kalash      | 292                   | 488        | Biaka Pygmy   | 1088                  |
| 59         | Sindhi      | 203                   | 488        | Biaka Pygmy   | 1089                  |
| 81         | Piapoco     | 705                   | 488        | Biaka Pygmy   | 1093                  |
| 81         | Piapoco     | 707                   | 489        | Mbuti Pygmy   | 468                   |
| 81         | Piapoco     | 709                   | 489        | Mbuti Pygmy   | 983                   |
| 81         | Piapoco     | 792                   | 494        | San           | 988                   |
| 81         | Piapoco     | 793                   | 504        | Gujarati      | 4250001               |
| 81         | Piapoco     | 827                   | 504        | Gujarati      | 46500080              |
| 82         | Karitiana   | 996                   | 504        | Gujarati      | 48900024              |
| 82         | Karitiana   | 997                   | 504        | Gujarati      | 48900027              |
| 82         | Karitiana   | 1000                  | 504        | Gujarati      | 425000471             |
| 82         | Karitiana   | 1004                  | 504        | Gujarati      | 425000474             |
| 82         | Karitiana   | 1005                  | 504        | Gujarati      | 425000475             |
| 82         | Karitiana   | 1007                  | 504        | Gujarati      | 425000476             |
| 82         | Karitiana   | 1008                  | 504        | Gujarati      | 425000477             |
| 82         | Karitiana   | 1011                  | 504        | Gujarati      | 425000478             |
| 82         | Karitiana   | 1016                  | 504        | Gujarati      | 425000480             |
| 82         | Karitiana   | 1017                  | 504        | Gujarati      | 425000481             |
| 83         | Surui       | 830                   | 504        | Gujarati      | 425000482             |
| 83         | Surui       | 834                   | 504        | Gujarati      | 425000485             |
| 83         | Surui       | 835                   | 504        | Gujarati      | 425000489             |
| 83         | Surui       | 839                   | 504        | Gujarati      | 425000501             |
| 83         | Surui       | 840                   | 504        | Gujarati      | 425000502             |
| 83         | Surui       | 841                   | 504        | Gujarati      | 506000139             |
| 83         | Surui       | 842                   | 611        | Lahu          | 1324                  |
| 83         | Surui       | 844                   | 611        | Lahu          | 1325                  |
| 83         | Surui       | 847                   | 613        | Oroqen        | 1210                  |
| 83         | Surui       | 848                   | 625        | Naxi          | 1343                  |
| 83         | Surui       | 850                   | 677        | Cambodian     | 718                   |
| 83         | Surui       | 851                   | 811        | Chipewyan     | 2395                  |
| 86         | Maya        | 866                   | 811        | Chipewyan     | 2399                  |
| 86         | Maya        | 867                   | 811        | Chipewyan     | 2400                  |
| 86         | Maya        | 878                   | 811        | Chipewyan     | 2560                  |
| 87         | Pima        | 1038                  | 812        | Cree          | 2418                  |
| 87         | Pima        | 1039                  | 813        | Ojibwa        | 2421                  |
| 87         | Pima        | 1040                  | 813        | Ojibwa        | 2430                  |
| 87         | Pima        | 1042                  | 813        | Ojibwa        | 2432                  |
| 87         | Pima        | 1045                  | 813        | Ojibwa        | 2440                  |
| 87         | Pima        | 1046                  | 821        | Kaqchikel     | 2690                  |

|      |                   |       |      |                    |       |
|------|-------------------|-------|------|--------------------|-------|
| 87   | Pima              | 1048  | 822  | Mixtec             | 2054  |
| 822  | Mixtec            | 2055  | 1007 | Mangseng           | 12034 |
| 832  | Cabecar           | 2034  | 1007 | Mangseng           | 12041 |
| 835  | Guarani           | 2726  | 1007 | Mangseng           | 12131 |
| 835  | Guarani           | 2729  | 1008 | Melamela           | 13111 |
| 836  | Ache              | 2746  | 1009 | Mengen             | 14021 |
| 841  | Kogi              | 2461  | 1009 | Mengen             | 14081 |
| 841  | Kogi              | 2462  | 1009 | Mengen             | 14111 |
| 841  | Kogi              | 2463  | 1010 | Sulka (Ganai)      | 20001 |
| 841  | Kogi              | 2464  | 1010 | Sulka (Ganai)      | 20161 |
| 841  | Kogi              | 2467  | 1010 | Sulka (Ganai)      | 20171 |
| 841  | Kogi              | 2473  | 1010 | Sulka (Ganai)      | 20201 |
| 841  | Kogi              | 2475  | 1010 | Sulka (Ganai)      | 20241 |
| 841  | Kogi              | 2476  | 1012 | Kol                | 8021  |
| 842  | Zenu              | 2485  | 1012 | Kol                | 8051  |
| 842  | Zenu              | 2487  | 1014 | Nakanai (Loso)     | 16001 |
| 843  | Inga              | 2518  | 1015 | Mamusi (Kisiluvi)  | 10161 |
| 844  | Wayuu             | 2525  | 1015 | Mamusi (Kisiluvi)  | 10241 |
| 844  | Wayuu             | 2539  | 1016 | Mamusi (Lingite)   | 11011 |
| 845  | Ticuna (Arara)    | 2543  | 1016 | Mamusi (Lingite)   | 11051 |
| 846  | Ticuna (Tarapaca) | 2764  | 1016 | Mamusi (Lingite)   | 11121 |
| 846  | Ticuna (Tarapaca) | 2767  | 1016 | Mamusi (Lingite)   | 11191 |
| 846  | Ticuna (Tarapaca) | 2768  | 1018 | Ata (Lugei)        | 6003  |
| 846  | Ticuna (Tarapaca) | 2793  | 1018 | Ata (Lugei)        | 6101  |
| 846  | Ticuna (Tarapaca) | 2795  | 1018 | Ata (Lugei)        | 6123  |
| 846  | Ticuna (Tarapaca) | 2797  | 1018 | Ata (Lugei)        | 6161  |
| 847  | Embera            | 2562  | 1018 | Ata (Lugei)        | 6181  |
| 847  | Embera            | 2564  | 1019 | Baining (Malasait) | 17051 |
| 847  | Embera            | 2566  | 1019 | Baining (Malasait) | 17081 |
| 847  | Embera            | 2569  | 1019 | Baining (Malasait) | 17211 |
| 848  | Wanana            | 2584  | 1020 | Baining (Marabu)   | 18001 |
| 848  | Wanana            | 2585  | 1020 | Baining (Marabu)   | 18021 |
| 848  | Wanana            | 2586  | 1020 | Baining (Marabu)   | 18131 |
| 848  | Wanana            | 2587  | 1020 | Baining (Marabu)   | 18171 |
| 848  | Wanana            | 2588  | 1020 | Baining (Marabu)   | 18191 |
| 848  | Wanana            | 2590  | 1020 | Baining (Marabu)   | 18221 |
| 848  | Wanana            | 2597  | 1020 | Baining (Marabu)   | 18241 |
| 848  | Wanana            | 2600  | 1021 | Baining (Rangulit) | 19071 |
| 849  | Arhuaco           | 2158  | 1021 | Baining (Rangulit) | 19081 |
| 849  | Arhuaco           | 2159  | 1021 | Baining (Rangulit) | 19101 |
| 849  | Arhuaco           | 2458  | 1022 | Tolai (Kabakada)   | 22191 |
| 849  | Arhuaco           | 2460  | 1024 | Mussau             | 27081 |
| 849  | Arhuaco           | 2576  | 1024 | Mussau             | 27181 |
| 849  | Arhuaco           | 2577  | 1024 | Mussau             | 27201 |
| 849  | Arhuaco           | 2579  | 1025 | Lavongai (North)   | 25001 |
| 883  | Paposo            | 2266  | 1025 | Lavongai (North)   | 25121 |
| 892  | Peque             | 2623  | 1025 | Lavongai (North)   | 25181 |
| 1001 | East Highlands    | 54071 | 1026 | Lavongai (North)   | 26141 |
| 1004 | Kove              | 9201  | 1026 | Lavongai (North)   | 26171 |
| 1005 | Anem (Keraiai)    | 4051  | 1026 | Lavongai (North)   | 26231 |
| 1005 | Anem (Keraiai)    | 4101  | 1028 | Nalik              | 31031 |
| 1006 | Anem (Purailing)  | 5041  | 1028 | Nalik              | 31071 |
| 1006 | Anem (Purailing)  | 5053  | 1028 | Nalik              | 31101 |
| 1006 | Anem (Purailing)  | 5151  | 1028 | Nalik              | 31144 |

|      |                 |       |      |            |       |
|------|-----------------|-------|------|------------|-------|
| 1007 | Mangseng        | 12021 | 1028 | Nalik      | 31161 |
| 1029 | Notsi           | 32061 | 1035 | Aita       | 36121 |
| 1029 | Notsi           | 32091 | 1035 | Aita       | 36151 |
| 1029 | Notsi           | 32171 | 1035 | Aita       | 36231 |
| 1029 | Notsi           | 32181 | 1037 | Nasioi     | 490   |
| 1030 | Kuot (Kabil)    | 28021 | 1037 | Nasioi     | 657   |
| 1030 | Kuot (Kabil)    | 28091 | 1037 | Nasioi     | 658   |
| 1030 | Kuot (Kabil)    | 28101 | 1037 | Nasioi     | 662   |
| 1031 | Kuot (Lamalaua) | 29001 | 1037 | Nasioi     | 663   |
| 1032 | Madak           | 30081 | 1037 | Nasioi     | 664   |
| 1032 | Madak           | 30161 | 1037 | Nasioi     | 789   |
| 1032 | Madak           | 30171 | 1037 | Nasioi     | 824   |
| 1032 | Madak           | 30221 | 1037 | Nasioi     | 825   |
| 1033 | Saposa          | 34021 | 1042 | Maoris     | 62171 |
| 1034 | Teop            | 35001 | 1042 | Maoris     | 62181 |
| 1034 | Teop            | 35201 | 1042 | Maoris     | 62221 |
| 1034 | Teop            | 35211 | 1043 | Ami        | 47191 |
| 1034 | Teop            | 35221 | 1043 | Ami        | 47221 |
| 1035 | Aita            | 36003 | 1044 | Taruko     | 42141 |
| 1035 | Aita            | 36011 | 1114 | Bedzan     | 71584 |
| 1035 | Aita            | 36031 | 1222 | Australian | 79195 |
