# Supplementary material for: Population Structure in a Comprehensive Genomic Data Set on Human Microsatellite Variation
Source: Oxford University Press journal article supplement (doi:10.1534/g3.113.005728), 2013-03-28
Supplement: 005728_tables22.pdf [file 005728_tables22.pdf]

**Table S22** The 112 individuals in MS5547 but not in MS5435

| Population |                   | Identification | Population |                    | Identification |
|------------|-------------------|----------------|------------|--------------------|----------------|
| ID         | Name              | number         | ID         | Name               | number         |
| 36         | Bedouin           | 617            | 903        | Tunisian Jewish    | 2345           |
| 37         | Druze             | 570            | 903        | Tunisian Jewish    | 2348           |
| 37         | Druze             | 585            | 1001       | East Highlands     | 54011          |
| 38         | Palestinian       | 681            | 1004       | Kove               | 9091           |
| 38         | Palestinian       | 728            | 1004       | Kove               | 9111           |
| 38         | Palestinian       | 742            | 1004       | Kove               | 9133           |
| 38         | Palestinian       | 743            | 1004       | Kove               | 9151           |
| 54         | Hazara            | 128            | 1005       | Anem (Keraiai)     | 4071           |
| 56         | Kalash            | 321            | 1005       | Anem (Keraiai)     | 4091           |
| 83         | Surui             | 833            | 1005       | Anem (Keraiai)     | 4141           |
| 86         | Maya              | 874            | 1007       | Mangseng           | 12071          |
| 464        | Mandenka          | 916            | 1008       | Melamela           | 13001          |
| 464        | Mandenka          | 919            | 1008       | Melamela           | 13091          |
| 488        | Biaka Pygmy       | 448            | 1008       | Melamela           | 13131          |
| 488        | Biaka Pygmy       | 1084           | 1008       | Melamela           | 13141          |
| 488        | Biaka Pygmy       | 1085           | 1011       | Sulka (Watwat)     | 21031          |
| 488        | Biaka Pygmy       | 1091           | 1012       | Kol                | 8081           |
| 504        | Gujarati          | 42600087       | 1012       | Kol                | 8171           |
| 504        | Gujarati          | 50200040       | 1013       | Nakanai (Bileki)   | 15063          |
| 504        | Gujarati          | 51300078       | 1013       | Nakanai (Bileki)   | 15121          |
| 504        | Gujarati          | 404000112      | 1013       | Nakanai (Bileki)   | 15151          |
| 504        | Gujarati          | 503000106      | 1013       | Nakanai (Bileki)   | 15204          |
| 811        | Chipewyan         | 2156           | 1014       | Nakanai (Loso)     | 16023          |
| 811        | Chipewyan         | 2383           | 1015       | Mamusi (Kisiluvi)  | 10121          |
| 811        | Chipewyan         | 2387           | 1017       | Ata (Uasilau)      | 7181           |
| 811        | Chipewyan         | 2390           | 1018       | Ata (Lugei)        | 6081           |
| 811        | Chipewyan         | 2393           | 1019       | Baining (Malasait) | 17201          |
| 811        | Chipewyan         | 2515           | 1021       | Baining (Rangulit) | 19001          |
| 811        | Chipewyan         | 2800           | 1022       | Tolai (Kabakada)   | 22051          |
| 813        | Ojibwa            | 2428           | 1023       | Tolai (Vunairoto)  | 23131          |
| 813        | Ojibwa            | 2436           | 1023       | Tolai (Vunairoto)  | 23143          |
| 813        | Ojibwa            | 2437           | 1026       | Lavongai (South)   | 26091          |
| 813        | Ojibwa            | 2438           | 1026       | Lavongai (South)   | 26211          |
| 831        | Guaymi            | 2002           | 1027       | Tigak              | 33081          |
| 831        | Guaymi            | 2014           | 1028       | Nalik              | 31211          |
| 832        | Cabecar           | 2026           | 1030       | Kuot (Kabil)       | 28081          |
| 832        | Cabecar           | 2037           | 1030       | Kuot (Kabil)       | 28171          |
| 836        | Ache              | 2747           | 1031       | Kuot (Lamalaua)    | 29131          |
| 836        | Ache              | 2748           | 1032       | Madak              | 30072          |
| 841        | Kogi              | 2466           | 1032       | Madak              | 30104          |
| 842        | Zenu              | 2494           | 1032       | Madak              | 30111          |
| 842        | Zenu              | 2496           | 1033       | Saposa             | 34011          |
| 842        | Zenu              | 2499           | 1033       | Saposa             | 34151          |
| 843        | Inga              | 2505           | 1033       | Saposa             | 34171          |
| 846        | Ticuna (Tarapaca) | 2761           | 1033       | Saposa             | 34231          |
| 846        | Ticuna (Tarapaca) | 2792           | 1034       | Teop               | 35043          |
| 848        | Waunana           | 2599           | 1035       | Aita               | 36091          |
| 882        | Quetalmahue       | 2288           | 1035       | Aita               | 36211          |
| 883        | Paposo            | 2267           | 1037       | Nasioi             | 823            |

|      |        |       |      |               |       |
|------|--------|-------|------|---------------|-------|
| 885  | Salta  | 2180  | 1037 | Nasioi        | 978   |
| 1044 | Taruko | 42151 | 1110 | Pare          | 70446 |
| 1101 | Hadza  | 70027 | 1114 | Bedzan        | 71578 |
| 1101 | Hadza  | 70047 | 1127 | Bamoun        | 71054 |
| 1101 | Hadza  | 70048 | 1132 | Podokwo       | 73033 |
| 1101 | Hadza  | 71474 | 1200 | Tikar (South) | 71731 |
| 1103 | Iraqw  | 70204 | 1239 | Pokot         | 72636 |

---
