# Supplementary material for: Population Structure in a Comprehensive Genomic Data Set on Human Microsatellite Variation
Source: Oxford University Press journal article supplement (doi:10.1534/g3.113.005728), 2013-03-28
Supplement: 005728_tables24.pdf [file 005728_tables24.pdf]

**Table S24** Three individuals with >27.5% missing data in the combined human-chimpanzee data set

| Population |                |                    | Identification number<br>of individual | Fraction of loci with<br>missing genotypes |
|------------|----------------|--------------------|----------------------------------------|--------------------------------------------|
| ID         | Name           | Data set of origin |                                        |                                            |
| 1270       | Nyimang        | African            | 103351                                 | 0.382                                      |
| 886        | Tucuman        | Latino             | 2194                                   | 0.317                                      |
| 1014       | Nakanai (Loso) | Pacific Islander   | 16024                                  | 0.297                                      |
