# Supplementary material for: Population Structure in a Comprehensive Genomic Data Set on Human Microsatellite Variation
Source: Oxford University Press journal article supplement (doi:10.1534/g3.113.005728), 2013-03-28
Supplement: 005728_tables25.pdf [file 005728_tables25.pdf]

**Table S25** 27 loci from the combined human data set of 645 loci with no genotype data in at least one population

| <b>ID in combined data set</b> | <b>Populations with no genotype data</b>                                       |
|--------------------------------|--------------------------------------------------------------------------------|
| GATA35_11                      | Cape Mixed Ancestry, Venda, !Xun/Kxoe, Xhosa, Koma, Beta Israel, Dogon, Temani |
| GATA11B08P_6                   | Koma, Beta Israel, Dogon, Temani                                               |
| TCTA017M_9                     | Koma, Beta Israel, Dogon, Temani                                               |
| AGAT139P_20                    | Koma, Beta Israel, Dogon, Temani                                               |
| TTTA063P_1                     | Dogon, Fulani (Nigeria)                                                        |
| TTAT027P_15                    | Nuer, Shilook                                                                  |
| D1S1653                        | Dogon                                                                          |
| GATA51H01_1                    | Dogon                                                                          |
| AGAT117_2                      | Dogon                                                                          |
| D3S3045                        | Dogon                                                                          |
| GATA138B05_5                   | Australian                                                                     |
| GATA142H05P_5                  | Fulani (Nigeria)                                                               |
| D6S1027                        | Dogon                                                                          |
| GATA61G06_7                    | Dogon                                                                          |
| AGAT049P_7                     | Nuer                                                                           |
| GATA65D11_9                    | Fulani (Nigeria)                                                               |
| D10S1208                       | Ewondo                                                                         |
| ATA20B07_10                    | Dogon                                                                          |
| ATA44G07M_10                   | Dogon                                                                          |
| D11S4459                       | Nuer                                                                           |
| AGAT110P_13                    | Shilook                                                                        |
| GATA137B09_13                  | Fulani (Nigeria)                                                               |
| ATA70B03P_14                   | Nuer                                                                           |
| D16S753                        | Dogon                                                                          |
| D17S1294                       | Dogon                                                                          |
| D18S858                        | Dogon                                                                          |
| D19S1034                       | !Xun\Kxoe                                                                      |
