# Supplementary material for: Population Structure in a Comprehensive Genomic Data Set on Human Microsatellite Variation
Source: Oxford University Press journal article supplement (doi:10.1534/g3.113.005728), 2013-03-28
Supplement: 005728_tables26.pdf [file 005728_tables26.pdf]

**Table S26** 10 loci from the combined human-chimpanzee data set of 246 loci with no genotype data in at least one population

| <b>ID in combined data set</b> | <b>Populations with no genotype data</b> |
|--------------------------------|------------------------------------------|
| TCTA017M_9                     | Koma, Beta Israel, Dogon, Temani         |
| D1S1653                        | Dogon                                    |
| GATA138B05_5                   | Australian                               |
| D6S1027                        | Dogon                                    |
| GATA61G06_7                    | Dogon                                    |
| D11S4459                       | Nuer                                     |
| D12S1042                       | Bonobo                                   |
| ATA70B03P_14                   | Nuer                                     |
| D17S1294                       | Dogon                                    |
| D18S858                        | Dogon                                    |
