# Supplementary material for: Population Structure in a Comprehensive Genomic Data Set on Human Microsatellite Variation
Source: PubMed Central journal article supplement (PMC3656735; doi:10.1534/g3.113.005728), 2013-05-01
Supplement: supp_g3.113.005728_FigureS5.pdf [file supp_g3.113.005728_FigureS5.pdf]

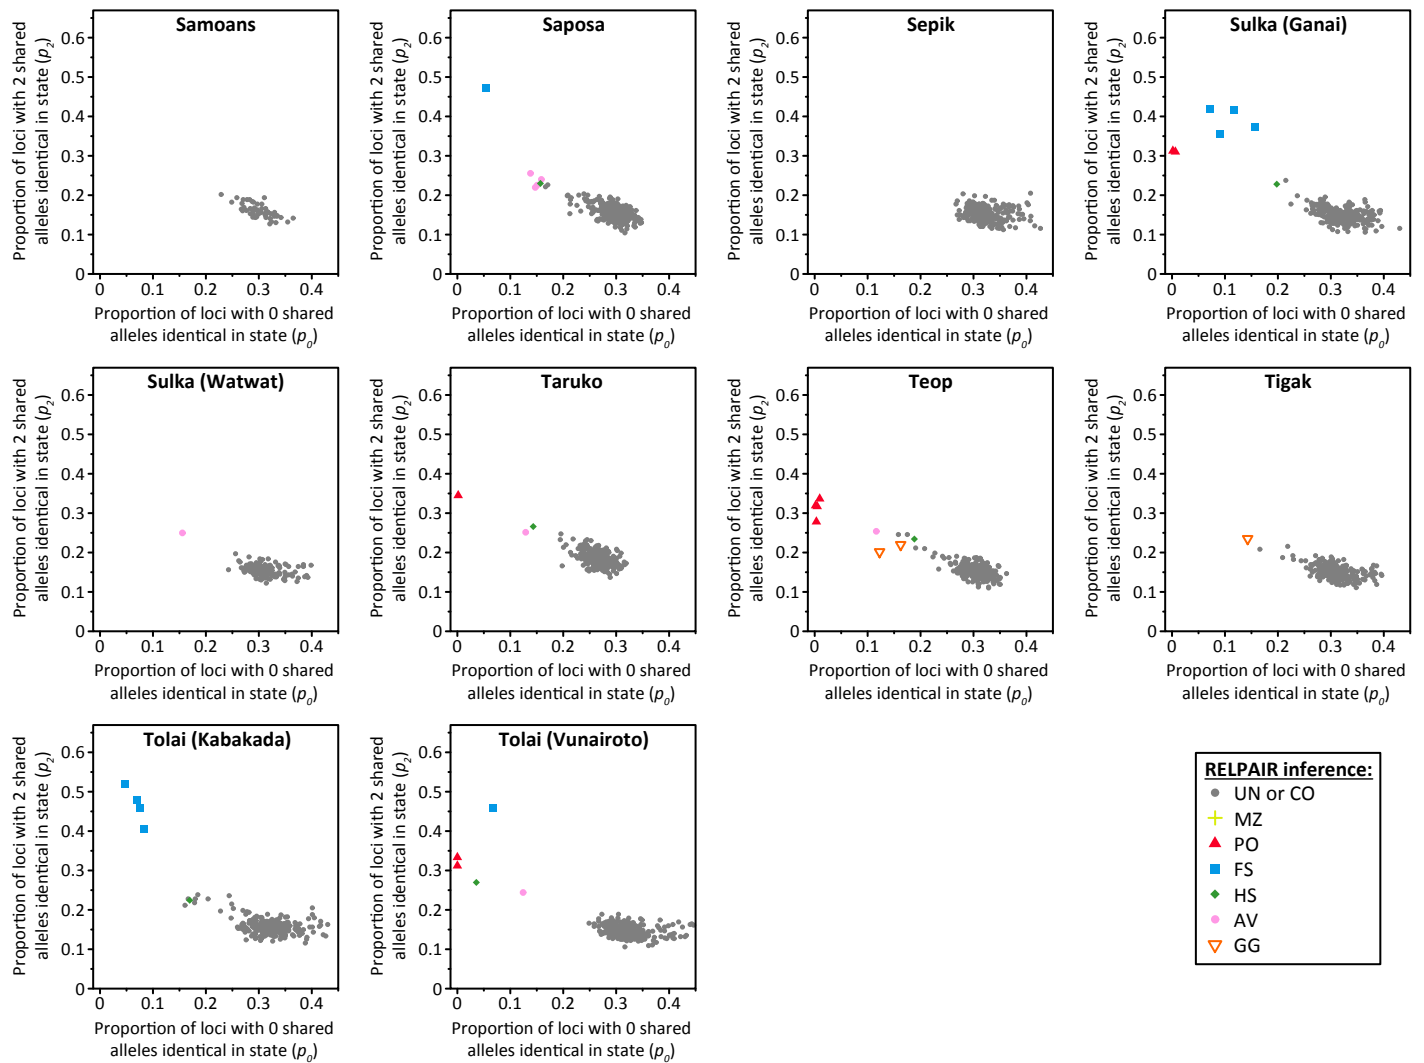

**Figure S5** Intra-population allele-sharing for pairs of individuals in the Pacific Islander data set (part 3). First- and second-degree relative pairs are reported in Tables S10 and S11, respectively.
