# Supplementary material for: Population Structure in a Comprehensive Genomic Data Set on Human Microsatellite Variation
Source: PubMed Central journal article supplement (PMC3656735; doi:10.1534/g3.113.005728), 2013-05-01
Supplement: supp_g3.113.005728_FigureS7.pdf [file supp_g3.113.005728_FigureS7.pdf]

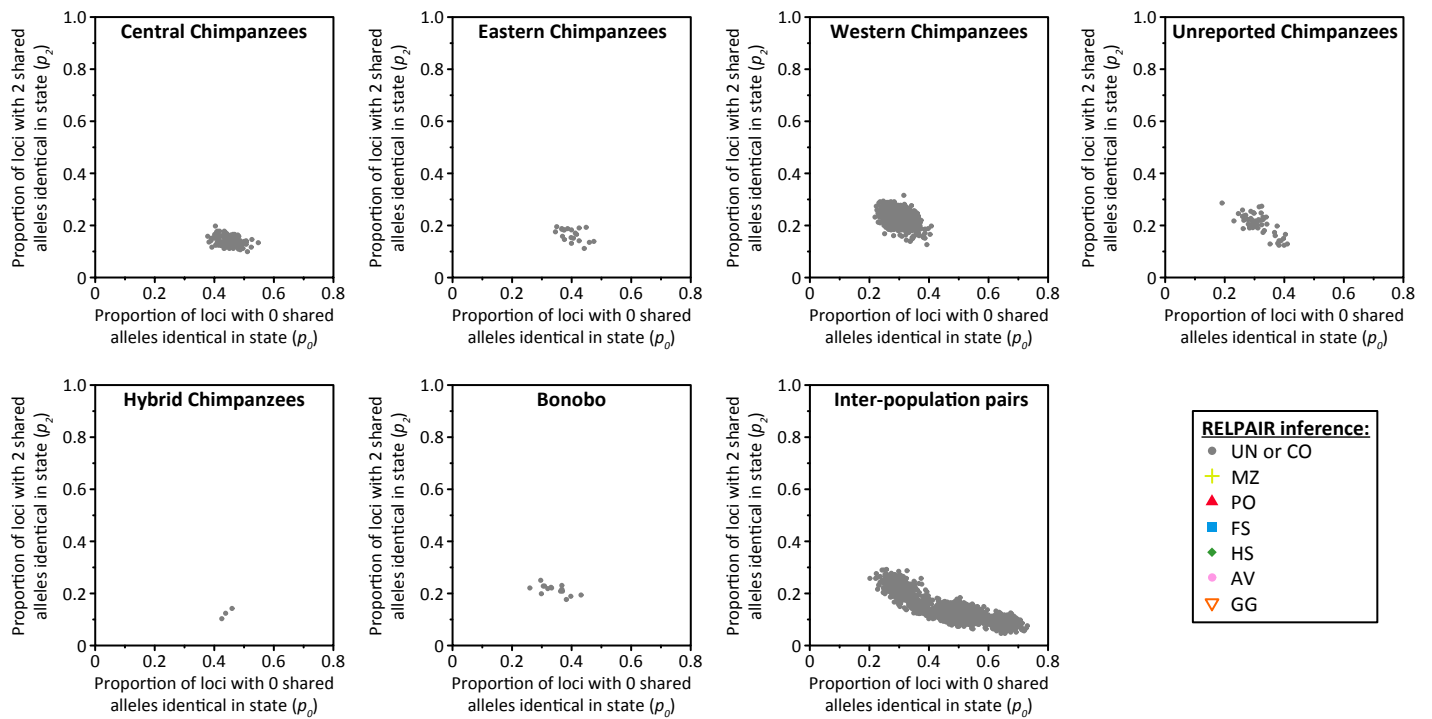

**Figure S7** Intra- and inter-population allele-sharing for pairs of individuals in the chimpanzee data set.
