# Supplementary material for: Population Structure in a Comprehensive Genomic Data Set on Human Microsatellite Variation
Source: PubMed Central journal article supplement (PMC3656735; doi:10.1534/g3.113.005728), 2013-05-01
Supplement: supp_g3.113.005728_TableS3.pdf [file supp_g3.113.005728_TableS3.pdf]

**Table S3** 11 loci excluded from the combined data set of 656 loci due to >10% missing data

| <b>Locus ID</b> | <b>Fraction of individuals with missing genotypes</b> |
|-----------------|-------------------------------------------------------|
| D2S1780         | 0.287                                                 |
| D9S938          | 0.192                                                 |
| GTTTT002        | 0.188                                                 |
| AGAT135         | 0.177                                                 |
| AAT258          | 0.175                                                 |
| NA.D1S.1        | 0.171                                                 |
| D1S2134         | 0.167                                                 |
| AAT267          | 0.161                                                 |
| AGAT017         | 0.157                                                 |
| D1S3721         | 0.147                                                 |
| D3S2432         | 0.147                                                 |
