# Supplementary material for: Population Structure in a Comprehensive Genomic Data Set on Human Microsatellite Variation
Source: PubMed Central journal article supplement (PMC3656735; doi:10.1534/g3.113.005728), 2013-05-01
Supplement: supp_g3.113.005728_TableS4.pdf [file supp_g3.113.005728_TableS4.pdf]

**Table S4** 68 individuals excluded from the combined data set of 5916 individuals due to >27.5% missing data

| ID   | Population          |                    | Identification number<br>of individual | Fraction of loci with<br>missing genotypes |
|------|---------------------|--------------------|----------------------------------------|--------------------------------------------|
|      | Name                | Data set of origin |                                        |                                            |
| 1009 | Mengen              | Pacific Islander   | 14131                                  | 0.868                                      |
| 1009 | Mengen              | Pacific Islander   | 14141                                  | 0.786                                      |
| 1116 | Ngumba              | African            | 70753                                  | 0.586                                      |
| 1280 | Temani              | African            | 103376                                 | 0.524                                      |
| 1278 | Dogon               | African            | 103335                                 | 0.513                                      |
| 1280 | Temani              | African            | 103372                                 | 0.510                                      |
| 811  | Chipewyan           | Native American    | 2384                                   | 0.501                                      |
| 1013 | Nakanai (Bileki)    | Pacific Islander   | 15241                                  | 0.491                                      |
| 845  | Ticuna (Arara)      | Native American    | 2547                                   | 0.490                                      |
| 1022 | Tolai (Kabakada)    | Pacific Islander   | 22071                                  | 0.478                                      |
| 824  | Zapotec             | Native American    | 2091                                   | 0.471                                      |
| 1017 | Ata (Uasilau)       | Pacific Islander   | 7003                                   | 0.471                                      |
| 1272 | Cape Mixed Ancestry | African            | 103215                                 | 0.468                                      |
| 1005 | Anem (Keraiai)      | Pacific Islander   | 4031                                   | 0.457                                      |
| 1268 | Nuer                | African            | 73132                                  | 0.457                                      |
| 884  | Catamarca           | Latino             | 2154                                   | 0.456                                      |
| 1273 | Venda               | African            | 103242                                 | 0.456                                      |
| 1254 | Wimbum              | African            | 72932                                  | 0.451                                      |
| 871  | Oriente             | Latino             | 2219                                   | 0.440                                      |
| 822  | Mixtec              | Native American    | 2042                                   | 0.434                                      |
| 1034 | Teop                | Pacific Islander   | 35111                                  | 0.434                                      |
| 843  | Inga                | Native American    | 2509                                   | 0.431                                      |
| 831  | Guaymi              | Native American    | 2009                                   | 0.420                                      |
| 690  | Tundra Nentsi       | Native American    | 2457                                   | 0.419                                      |
| 1271 | Sara (Various)      | African            | 73026                                  | 0.419                                      |
| 1278 | Dogon               | African            | 103333                                 | 0.419                                      |
| 1241 | Maasai (Ilchamus)   | African            | 72708                                  | 0.411                                      |
| 1272 | Cape Mixed Ancestry | African            | 103216                                 | 0.411                                      |
| 837  | Kaingang            | Native American    | 2757                                   | 0.408                                      |
| 824  | Zapotec             | Native American    | 2082                                   | 0.406                                      |
| 831  | Guaymi              | Native American    | 2003                                   | 0.398                                      |
| 884  | Catamarca           | Latino             | 2150                                   | 0.398                                      |
| 836  | Ache                | Native American    | 2742                                   | 0.389                                      |
| 1235 | Gabra               | African            | 72527                                  | 0.388                                      |
| 1278 | Dogon               | African            | 103339                                 | 0.386                                      |
| 1278 | Dogon               | African            | 103352                                 | 0.383                                      |
| 1276 | Koma                | African            | 103304                                 | 0.369                                      |
| 1278 | Dogon               | African            | 103332                                 | 0.367                                      |
| 1012 | Kol                 | Pacific Islander   | 8281                                   | 0.364                                      |
| 1274 | !Xun/Kxoe           | African            | 103258                                 | 0.364                                      |
| 849  | Arhuaco             | Native American    | 2733                                   | 0.363                                      |
| 1280 | Temani              | African            | 103385                                 | 0.353                                      |
| 1272 | Cape Mixed Ancestry | African            | 103186                                 | 0.349                                      |
| 836  | Ache                | Native American    | 2737                                   | 0.347                                      |
| 1273 | Venda               | African            | 103248                                 | 0.346                                      |
| 1101 | Hadza               | African            | 71463                                  | 0.343                                      |
| 54   | Hazara              | HGDP-CEPH          | 127                                    | 0.341                                      |

|      |                     |                  |          |       |
|------|---------------------|------------------|----------|-------|
| 1022 | Tolai (Kabakada)    | Pacific Islander | 22041    | 0.341 |
| 812  | Cree                | Native American  | 2403     | 0.340 |
| 1272 | Cape Mixed Ancestry | African          | 103211   | 0.340 |
| 1274 | !Xun/Kxoe           | African          | 103260   | 0.338 |
| 514  | Punjabi             | Asian Indian     | 63000346 | 0.333 |
| 57   | Makrani             | HGDP-CEPH        | 139      | 0.332 |
| 837  | Kaingang            | Native American  | 2756     | 0.332 |
| 1272 | Cape Mixed Ancestry | African          | 103206   | 0.330 |
| 1275 | Xhosa               | African          | 103287   | 0.326 |
| 1101 | Hadza               | African          | 71454    | 0.322 |
| 845  | Ticuna (Arara)      | Native American  | 2541     | 0.316 |
| 834  | Huilliche           | Native American  | 2122     | 0.313 |
| 1276 | Koma                | African          | 103306   | 0.305 |
| 901  | Ashkenazi Jewish    | Jewish           | 2315     | 0.301 |
| 1011 | Sulka (Watwat)      | Pacific Islander | 21163    | 0.299 |
| 841  | Kogi                | Native American  | 2472     | 0.298 |
| 1107 | Burunge             | African          | 70347    | 0.290 |
| 1259 | Baluba              | African          | 73014    | 0.288 |
| 1272 | Cape Mixed Ancestry | African          | 103210   | 0.287 |
| 1278 | Dogon               | African          | 103343   | 0.279 |
| 1229 | Kikuyu              | African          | 72381    | 0.278 |
