# Supplementary material for: Population Structure in a Comprehensive Genomic Data Set on Human Microsatellite Variation
Source: PubMed Central journal article supplement (PMC3656735; doi:10.1534/g3.113.005728), 2013-05-01
Supplement: supp_g3.113.005728_TableS6.pdf [file supp_g3.113.005728_TableS6.pdf]

**Table S6** 12 previously unreported intra-population second-degree relative pairs in the African data set

| Population |               | Identification number |                      | RELPAIR inference:<br>Avuncular (AV),<br>grandparental (GG),<br>or half-sibling (HS) | Support for inference:<br>RELPAIR (R) or<br>allele-sharing (A) |
|------------|---------------|-----------------------|----------------------|--------------------------------------------------------------------------------------|----------------------------------------------------------------|
| ID         | Name          | First<br>individual   | Second<br>individual |                                                                                      |                                                                |
| 1132       | Podokwo       | 73033                 | 72886                | AV                                                                                   | R,A                                                            |
| 1110       | Pare          | 70446                 | 70452                | GG                                                                                   | R,A                                                            |
| 1114       | Bedzan        | 71578                 | 70672                | GG                                                                                   | R,A                                                            |
| 1127       | Bamoun        | 71053                 | 71054                | GG                                                                                   | R,A                                                            |
| 1222       | Australian    | 79194                 | 79195                | GG                                                                                   | R,A                                                            |
| 1239       | Pokot         | 72632                 | 72636                | GG                                                                                   | R,A                                                            |
| 1101       | Hadza         | 70030                 | 70027                | HS                                                                                   | R,A                                                            |
| 1101       | Hadza         | 70047                 | 70038                | HS                                                                                   | R,A                                                            |
| 1101       | Hadza         | 70048                 | 70071                | HS                                                                                   | R,A                                                            |
| 1101       | Hadza         | 71474                 | 70079                | HS                                                                                   | R,A                                                            |
| 1103       | Iraqw         | 70207                 | 70204                | HS                                                                                   | R,A                                                            |
| 1200       | Tikar (South) | 71729                 | 71731                | HS                                                                                   | R,A                                                            |
