# Supplementary material for: Population Structure in a Comprehensive Genomic Data Set on Human Microsatellite Variation
Source: PubMed Central journal article supplement (PMC3656735; doi:10.1534/g3.113.005728), 2013-05-01
Supplement: supp_g3.113.005728_TableS8.pdf [file supp_g3.113.005728_TableS8.pdf]

**Table S8** Four previously unreported intra-population second-degree relative pairs in the Latino data set

| Population |             | Identification number |                      | RELPAIR inference:<br>Avuncular (AV),<br>grandparental (GG),<br>or half-sibling (HS) | Support for inference:<br>RELPAIR (R) or<br>allele-sharing (A) |
|------------|-------------|-----------------------|----------------------|--------------------------------------------------------------------------------------|----------------------------------------------------------------|
| ID         | Name        | First<br>individual   | Second<br>individual |                                                                                      |                                                                |
| 882        | Quetalmahue | 2282                  | 2288                 | AV                                                                                   | R,A                                                            |
| 885        | Salta       | 2169                  | 2180                 | AV                                                                                   | R,A                                                            |
| 883        | Paposo      | 2267                  | 2268                 | HS                                                                                   | R,A                                                            |
| 883        | Paposo      | 2267                  | 2274                 | HS                                                                                   | R,A                                                            |
