# Supplementary material for: Population Structure in a Comprehensive Genomic Data Set on Human Microsatellite Variation
Source: PubMed Central journal article supplement (PMC3656735; doi:10.1534/g3.113.005728), 2013-05-01
Supplement: supp_g3.113.005728_TableS11.pdf [file supp_g3.113.005728_TableS11.pdf]

**Table S11** 87 previously unreported intra-population second-degree relative pairs in the Pacific Islander data set

| Population |                                | Identification number |                   | RELPAIR inference:<br>Avuncular (AV),<br>grandparental (GG),<br>or half-sibling (HS) | Support for inference:<br>RELPAIR (R) or<br>allele-sharing (A) |
|------------|--------------------------------|-----------------------|-------------------|--------------------------------------------------------------------------------------|----------------------------------------------------------------|
| ID         | Name                           | First individual      | Second individual |                                                                                      |                                                                |
| 1001       | East Highlands (Gimi & Goroka) | 54001                 | 54011             | AV                                                                                   | R,A                                                            |
| 1004       | Kove                           | 9111                  | 9221              | AV                                                                                   | R,A                                                            |
| 1004       | Kove                           | 9151                  | 9031              | AV                                                                                   | R,A                                                            |
| 1007       | Mangseng                       | 12053                 | 12041             | AV                                                                                   | R,A                                                            |
| 1007       | Mangseng                       | 12121                 | 12071             | AV                                                                                   | R,A                                                            |
| 1008       | Melamela                       | 13001                 | 13181             | AV                                                                                   | R,A                                                            |
| 1011       | Sulka (Watwat)                 | 21081                 | 21031             | AV                                                                                   | R,A                                                            |
| 1012       | Kol                            | 8171                  | 8161              | AV                                                                                   | R,A                                                            |
| 1013       | Nakanai (Bileki)               | 15111                 | 15151             | AV                                                                                   | R,A                                                            |
| 1015       | Mamusi (Kisiluvi)              | 10061                 | 10241             | AV                                                                                   | R,A                                                            |
| 1015       | Mamusi (Kisiluvi)              | 10211                 | 10121             | AV                                                                                   | R,A                                                            |
| 1015       | Mamusi (Kisiluvi)              | 10241                 | 10121             | AV                                                                                   | R,A                                                            |
| 1017       | Ata (Uasilau)                  | 7131                  | 7181              | AV                                                                                   | R,A                                                            |
| 1018       | Ata (Lugei)                    | 6003                  | 6123              | AV                                                                                   | R,A                                                            |
| 1018       | Ata (Lugei)                    | 6021                  | 6201              | AV                                                                                   | R,A                                                            |
| 1019       | Baining (Malasait)             | 17161                 | 17201             | AV                                                                                   | R,A                                                            |
| 1020       | Baining (Marabu)               | 18031                 | 18131             | AV                                                                                   | R,A                                                            |
| 1021       | Baining (Rangulit)             | 19001                 | 19021             | AV                                                                                   | R,A                                                            |
| 1021       | Baining (Rangulit)             | 19111                 | 19081             | AV                                                                                   | R,A                                                            |
| 1023       | Tolai (Vunairoto)              | 23071                 | 23131             | AV                                                                                   | R,A                                                            |
| 1025       | Lavongai (North)               | 25041                 | 25001             | AV                                                                                   | R,A                                                            |
| 1025       | Lavongai (North)               | 25121                 | 25091             | AV                                                                                   | R,A                                                            |
| 1026       | Lavongai (South)               | 26011                 | 26091             | AV                                                                                   | R,A                                                            |
| 1028       | Nalik                          | 31211                 | 31121             | AV                                                                                   | R,A                                                            |
| 1030       | Kuot (Kabil)                   | 28073                 | 28171             | AV                                                                                   | R,A                                                            |
| 1030       | Kuot (Kabil)                   | 28081                 | 28181             | AV                                                                                   | R,A                                                            |
| 1030       | Kuot (Kabil)                   | 28091                 | 28171             | AV                                                                                   | R,A                                                            |
| 1031       | Kuot (Lamalaua)                | 29041                 | 29131             | AV                                                                                   | R,A                                                            |
| 1032       | Madak                          | 30191                 | 30104             | AV                                                                                   | R,A                                                            |
| 1033       | Saposa                         | 34011                 | 34041             | AV                                                                                   | R,A                                                            |
| 1033       | Saposa                         | 34033                 | 34151             | AV                                                                                   | R,A                                                            |
| 1033       | Saposa                         | 34111                 | 34231             | AV                                                                                   | R,A                                                            |
| 1033       | Saposa                         | 34171                 | 34191             | AV                                                                                   | R,A                                                            |
| 1034       | Teop                           | 35201                 | 35211             | AV                                                                                   | R,A                                                            |
| 1035       | Aita                           | 36051                 | 36211             | AV                                                                                   | R,A                                                            |
| 1037       | Nasioi                         | 825                   | 823               | AV                                                                                   | R,A                                                            |
| 1044       | Taruko                         | 42151                 | 42201             | AV                                                                                   | R,A                                                            |
| 1004       | Kove                           | 9091                  | 9121              | GG                                                                                   | R,A                                                            |
| 1005       | Anem (Keraiai)                 | 4081                  | 4051              | GG                                                                                   | R,A                                                            |
| 1005       | Anem (Keraiai)                 | 4141                  | 4131              | GG                                                                                   | R,A                                                            |
| 1006       | Anem (Purailing)               | 5181                  | 5083              | GG                                                                                   | R,A                                                            |
| 1008       | Melamela                       | 13051                 | 13141             | GG                                                                                   | R,A                                                            |
| 1008       | Melamela                       | 13091                 | 13193             | GG                                                                                   | R,A                                                            |
| 1008       | Melamela                       | 13131                 | 13211             | GG                                                                                   | R,A                                                            |
| 1008       | Melamela                       | 13231                 | 13141             | GG                                                                                   | R,A                                                            |

|      |                    |       |       |    |     |
|------|--------------------|-------|-------|----|-----|
| 1013 | Nakanai (Bileki)   | 15121 | 15235 | GG | R,A |
| 1013 | Nakanai (Bileki)   | 15161 | 15121 | GG | R,A |
| 1014 | Nakanai (Loso)     | 16051 | 16023 | GG | R,A |
| 1018 | Ata (Lugei)        | 6181  | 6041  | GG | R,A |
| 1020 | Baining (Marabu)   | 18051 | 18191 | GG | R,A |
| 1020 | Baining (Marabu)   | 18171 | 18031 | GG | R,A |
| 1020 | Baining (Marabu)   | 18221 | 18241 | GG | R,A |
| 1021 | Baining (Rangulit) | 19111 | 19101 | GG | R,A |
| 1027 | Tigak              | 33081 | 33051 | GG | R,A |
| 1028 | Nalik              | 31051 | 31144 | GG | R,A |
| 1031 | Kuot (Lamalaua)    | 29091 | 29131 | GG | R,A |
| 1032 | Madak              | 30081 | 30141 | GG | R,A |
| 1032 | Madak              | 30184 | 30111 | GG | R,A |
| 1034 | Teop               | 35043 | 35051 | GG | R,A |
| 1034 | Teop               | 35201 | 35061 | GG | R,A |
| 1035 | Aita               | 36151 | 36003 | GG | R,A |
| 1035 | Aita               | 36191 | 36091 | GG | R,A |
| 1004 | Kove               | 9014  | 9133  | HS | R,A |
| 1004 | Kove               | 9091  | 9001  | HS | R,A |
| 1004 | Kove               | 9201  | 9051  | HS | R,A |
| 1005 | Anem (Keraiai)     | 4061  | 4091  | HS | R,A |
| 1005 | Anem (Keraiai)     | 4131  | 4021  | HS | R,A |
| 1005 | Anem (Keraiai)     | 4181  | 4071  | HS | R,A |
| 1010 | Sulka (Ganai)      | 20161 | 20072 | HS | R,A |
| 1012 | Kol                | 8001  | 8081  | HS | R,A |
| 1013 | Nakanai (Bileki)   | 15063 | 15221 | HS | R,A |
| 1013 | Nakanai (Bileki)   | 15211 | 15204 | HS | R,A |
| 1015 | Mamusi (Kisiluvi)  | 10121 | 10111 | HS | R,A |
| 1018 | Ata (Lugei)        | 6081  | 6031  | HS | R,A |
| 1022 | Tolai (Kabakada)   | 22231 | 22051 | HS | R,A |
| 1023 | Tolai (Vunairoto)  | 23142 | 23143 | HS | R,A |
| 1026 | Lavongai (South)   | 26121 | 26091 | HS | R,A |
| 1026 | Lavongai (South)   | 26191 | 26211 | HS | R,A |
| 1028 | Nalik              | 31211 | 31144 | HS | R,A |
| 1030 | Kuot (Kabil)       | 28141 | 28081 | HS | R,A |
| 1032 | Madak              | 30081 | 30171 | HS | R,A |
| 1032 | Madak              | 30231 | 30072 | HS | R,A |
| 1033 | Saposa             | 34071 | 34151 | HS | R,A |
| 1034 | Teop               | 35024 | 35001 | HS | R,A |
| 1035 | Aita               | 36003 | 36161 | HS | R,A |
| 1035 | Aita               | 36021 | 36003 | HS | R,A |
| 1044 | Taruko             | 42141 | 42111 | HS | R,A |
