# Supplementary material for: Population Structure in a Comprehensive Genomic Data Set on Human Microsatellite Variation
Source: PubMed Central journal article supplement (PMC3656735; doi:10.1534/g3.113.005728), 2013-05-01
Supplement: supp_g3.113.005728_TableS13.pdf [file supp_g3.113.005728_TableS13.pdf]

**Table S13** One previously unreported inter-population first-degree relative pair in the African data set

| First Individual |       |                          | Second Individual |      |                          | RELPAIR inference:<br>parent/offspring (PO)<br>or full-sibling (FS) | Support for inference:<br>RELPAIR (R) or<br>allele-sharing (A) |
|------------------|-------|--------------------------|-------------------|------|--------------------------|---------------------------------------------------------------------|----------------------------------------------------------------|
| Population       |       | Identification<br>number | Population        |      | Identification<br>number |                                                                     |                                                                |
| ID               | Name  |                          | ID                | Name |                          |                                                                     |                                                                |
| 1191             | Dinka | 71432                    | 1276              | Koma | 103309                   | FS                                                                  | R,A                                                            |
