# Supplementary material for: Population Structure in a Comprehensive Genomic Data Set on Human Microsatellite Variation
Source: PubMed Central journal article supplement (PMC3656735; doi:10.1534/g3.113.005728), 2013-05-01
Supplement: supp_g3.113.005728_TableS14.pdf [file supp_g3.113.005728_TableS14.pdf]

**Table S14** One previously unreported inter-population second-degree relative pair in the African data set

| First Individual |        |                          | Second Individual |      |                          | RELPAIR inference:<br>Avuncular (AV),<br>grandparental (GG),<br>or half-sibling (HS) | Support for inference:<br>RELPAIR (R) or<br>allele-sharing (A) |
|------------------|--------|--------------------------|-------------------|------|--------------------------|--------------------------------------------------------------------------------------|----------------------------------------------------------------|
| Population       |        | Identification<br>number | Population        |      | Identification<br>number |                                                                                      |                                                                |
| ID               | Name   |                          | ID                | Name |                          |                                                                                      |                                                                |
| 1113             | Bakola | 70618                    | 1115              | Mvae | 70717                    | HS                                                                                   | R,A                                                            |
