# Supplementary material for: Population Structure in a Comprehensive Genomic Data Set on Human Microsatellite Variation
Source: PubMed Central journal article supplement (PMC3656735; doi:10.1534/g3.113.005728), 2013-05-01
Supplement: supp_g3.113.005728_TableS15.pdf [file supp_g3.113.005728_TableS15.pdf]

**Table S15** Two previously unreported inter-population monozygotic pairs in the Pacific Islander data set

| First individual |              |                          | Second individual |                  |                          | Support for inference:<br>RELPAIR (R) or<br>allele-sharing (A) |
|------------------|--------------|--------------------------|-------------------|------------------|--------------------------|----------------------------------------------------------------|
| Population       |              | Identification<br>number | Population        |                  | Identification<br>number |                                                                |
| ID               | Name         |                          | ID                | Name             |                          |                                                                |
| 1018             | Ata (Lugei)  | 6021                     | 1026              | Lavongai (North) | 26051                    | R,A                                                            |
| 1040             | Micronesians | 53171                    | 1041              | Samoans          | 55001                    | R,A                                                            |
