# Supplementary material for: Population Structure in a Comprehensive Genomic Data Set on Human Microsatellite Variation
Source: PubMed Central journal article supplement (PMC3656735; doi:10.1534/g3.113.005728), 2013-05-01
Supplement: supp_g3.113.005728_TableS23.pdf [file supp_g3.113.005728_TableS23.pdf]

**Table S23** Six chimpanzee populations present in the chimpanzee data set together with their sample sizes and average heterozygosities in the combined human-chimpanzee data set

| Population |            | Reported category in<br>Becquet <i>et al.</i> | Sample size |        |        | Unbiased heterozygosity |                | Source |
|------------|------------|-----------------------------------------------|-------------|--------|--------|-------------------------|----------------|--------|
| ID         | Species    |                                               | MS5879      | MS5631 | MS5519 | Mean                    | SD across loci |        |
| 1          | Chimpanzee | Central                                       | 16          | 16     | 16     | 0.738                   | 0.212          | [12]   |
| 2          | Chimpanzee | Eastern                                       | 7           | 7      | 7      | 0.698                   | 0.229          | [12]   |
| 3          | Chimpanzee | Western                                       | 41          | 41     | 41     | 0.627                   | 0.239          | [12]   |
| 4          | Chimpanzee | Unreported                                    | 11          | 11     | 11     | 0.644                   | 0.245          | [12]   |
| 5          | Chimpanzee | Hybrid                                        | 3           | 3      | 3      | 0.746                   | 0.238          | [12]   |
| 6          | Bonobo     | Bonobo                                        | 6           | 6      | 6      | 0.656                   | 0.271          | [12]   |

Population IDs are the same as those used in Becquet *et al.* [12].
